# Supplementary material for: Photocatalyst-free visible-light-induced highly selective acylation of purine nucleosides at the C6 position
Source: Royal Society of Chemistry journal article supplement (doi:10.1039/d3cc00906h), 2023-01-01

## Supporting Information

### **Photocatalyst-Free Visible-Light Induced Highly Selective Acylation of Purine Nucleosides at C6 Position**

#### **Table of Contents**

|                                                                          |           |
|--------------------------------------------------------------------------|-----------|
| <b>1. General Information.....</b>                                       | <b>2</b>  |
| <b>2. General Procedures for Preparation 3 (3aa as an example) .....</b> | <b>2</b>  |
| <b>3. The Exploration of Reaction Conditions<sup>a</sup> .....</b>       | <b>3</b>  |
| <b>4. Scale-up Reaction .....</b>                                        | <b>4</b>  |
| <b>5. Radical Trapped Experiments .....</b>                              | <b>4</b>  |
| <b>6. UV-visible Study .....</b>                                         | <b>5</b>  |
| <b>7. Characterization of Compounds.....</b>                             | <b>6</b>  |
| <b>8. NMR Spectra of Products .....</b>                                  | <b>23</b> |

## 1. General Information

All commercial reagents were purchased from Sigma-Aldrich, Alfa-Aesar, Acros and were used without further purification unless specified. The progress of the reaction was monitored by TLC.  $^1\text{H}$  and  $^{13}\text{C}$  NMR spectra were recorded on Bruker AV-400 spectrometers operating respectively at 400 MHz for  $^1\text{H}$  and 100 MHz for  $^{13}\text{C}$ . The peaks were internally referenced to TMS (0.00 ppm) or residual undeuterated solvent signal. Peak multiplicities are reported as follows: s = singlet, brs = broad singlet, d = doublet, t = triplet, m = multiplet, hept = heptet, dd = doublet of doublets. The high-resolution mass spectra (HRMS) of the new compounds were acquired on a Bruker microTOF-Q III spectrometer. Melting points were determined using X-4 apparatus and not corrected. The source of the blue LEDs is common LED lights. The power of each light is 24W. There is 3.0 cm distance between the reactor and the LEDs. This reaction could be well-performed using a quartz reaction tube (20 mL). Below we showed some photos of the setup for the photochemical reaction and at the beginning of the experiment, the WATTCAS parallel photoreactor (WP-TEC-1020HPL) was used to find a suitable light source.

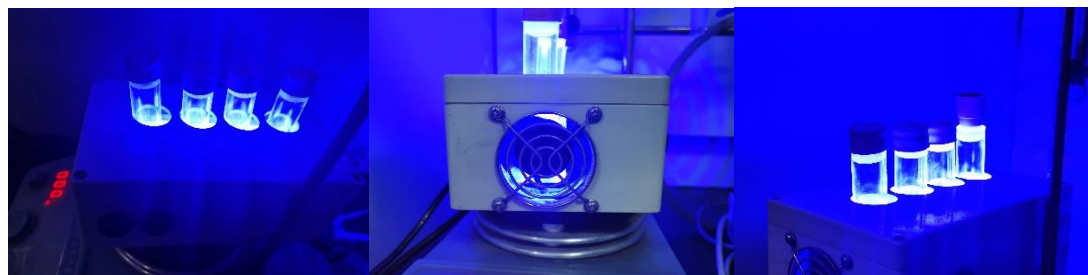

## 2. General Procedures for Preparation 3 (3aa as an example)

A mixture of (2*R*,3*R*,4*R*,5*R*)-2-(acetoxymethyl)-5-(9*H*-purin-9-yl) tetrahydrofuran-3,4-diyl diacetate **1a** (0.2 mmol), 4-methylbenzaldehyde **2a** (1.0 mmol), TBHP (0.4 mmol), TFA (0.3 mmol) and dry  $\text{MgSO}_4$  (0.6mmol) were stirred in ethyl acetate (2 mL) for 24 hours at room temperature irradiated by blue LEDs. After completion of the reaction, saturated aqueous  $\text{NaHCO}_3$  solution (10 mL) was added, then extracted with ethyl acetate 3 times (3×20 mL). The extract was washed with brine, dried over anhydrous  $\text{Na}_2\text{SO}_4$ , and concentrated. The crude mixture was purified by flash chromatography (petroleum ether/ethyl acetate = 1/2) to afford product **3aa**.

### 3. The Exploration of Reaction Conditions<sup>a</sup>

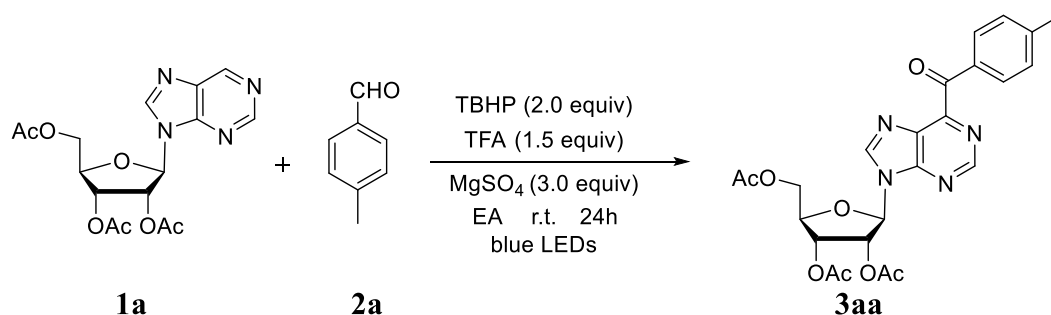

| Entry | Variation from “standard conditions”                                                                   | Yield <sup>b</sup> (%) |
|-------|--------------------------------------------------------------------------------------------------------|------------------------|
| 1     | None                                                                                                   | 82                     |
| 2     | No light irradiation                                                                                   | n.r.                   |
| 3     | No light irradiation, 120°C                                                                            | 19                     |
| 4     | No TBHP                                                                                                | n.r.                   |
| 5     | No TFA                                                                                                 | n.r.                   |
| 6     | No MgSO <sub>4</sub>                                                                                   | 46                     |
| 7     | 20 mol % of AgNO <sub>3</sub> instead of TFA                                                           | 23                     |
| 8     | 20 mol % of AgCO <sub>3</sub> instead of TFA                                                           | trace                  |
| 9     | 20 mol % of Ag <sub>2</sub> O instead of TFA                                                           | trace                  |
| 10    | 20 mol % of CF <sub>3</sub> COOAg instead of TFA                                                       | 19                     |
| 11    | 20 mol % of K <sub>2</sub> CO instead of TFA                                                           | trace                  |
| 12    | 1.5 equiv of TFAA instead of TFA                                                                       | 17                     |
| 13    | 1.5 equiv of TsOH instead of TFA                                                                       | 42                     |
| 14    | 1.5 equiv of TsOH·H <sub>2</sub> O instead of TFA                                                      | 35                     |
| 15    | 1.5 equiv of Ts <sub>2</sub> O instead of TFA                                                          | n.r.                   |
| 16    | 1.5 equiv of AcOH instead of TFA                                                                       | trace                  |
| 17    | 1.5 equiv of Ac <sub>2</sub> O instead of TFA                                                          | n.r.                   |
| 18    | 1.5 equiv of TfOH instead of TFA                                                                       | n.r.                   |
| 19    | 2.0 equiv of TBHP (in water) instead of TBHP (in decane)                                               | 29                     |
| 20    | 2.0 equiv of DTBP instead of TBHP (in decane)                                                          | 56                     |
| 21    | 2.0 equiv of K <sub>2</sub> S <sub>2</sub> O <sub>8</sub> instead of TBHP (in decane)                  | trace                  |
| 22    | 2.0 equiv of (NH <sub>4</sub> ) <sub>2</sub> S <sub>2</sub> O <sub>8</sub> instead of TBHP (in decane) | trace                  |
| 23    | 2.0 equiv of BPO instead of TBHP (in decane)                                                           | 37                     |
| 24    | 2.0 equiv of PIFA instead of TBHP (in decane)                                                          | n.r.                   |
| 25    | DCM as the solvent                                                                                     | 43                     |
| 26    | THF as the solvent                                                                                     | 25                     |
| 27    | DCE as the solvent                                                                                     | 39                     |
| 28    | CH <sub>3</sub> CN as the solvent                                                                      | 33                     |

<sup>a</sup>Reaction conditions: **1a** (0.2 mmol), **2a** (1.0 mmol), TBHP (0.4 mmol), TFA (0.3 mmol) and dry MgSO<sub>4</sub> (0.6 mmol) were stirred in ethyl acetate (2 mL) for 24 hours at room temperature irradiated by blue LEDs. <sup>b</sup> Isolated yield.

## 4. Scale-up Reaction

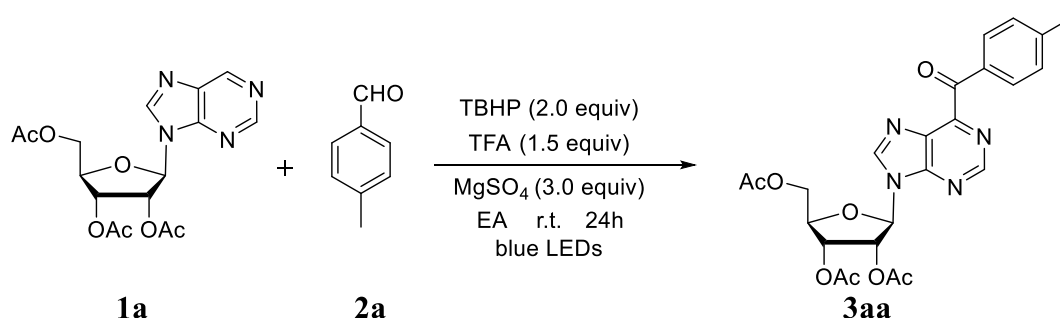

A mixture of (2*R*,3*R*,4*R*,5*R*)-2-(acetoxymethyl)-5-(9*H*-purin-9-yl) tetrahydrofuran-3,4-diyl diacetate **1a** (1.0 mmol), 4-methylbenzaldehyde **2a** (5.0 mmol), TBHP (2.0 mmol), TFA (1.5 mmol) and dry MgSO<sub>4</sub> (3.0 mmol) were stirred in ethyl acetate (5 mL) for 24 hours at room temperature irradiated by blue LEDs. After completion of the reaction, saturated aqueous NaHCO<sub>3</sub> solution (10 mL) was added, then extracted with ethyl acetate 3 times (3×20 mL). The extract was washed with brine, dried over anhydrous Na<sub>2</sub>SO<sub>4</sub> and concentrated. The crude mixture was purified by flash chromatography (petroleum ether/ethyl acetate = 1/2) as a yellow oil 307 mg, 0.618 mmol, 62% yield.

## 5. Radical Trapped Experiments

To further investigate the reaction mechanism for this acylation reaction, radical scavengers, including TEMPO and 1,1-diphenylethylene, were employed in the standard reaction, and the process was inhibited obviously. This result suggested that a free radical process might be involved in the present acylation reaction.

### (a) Reaction in the presence of TEMPO

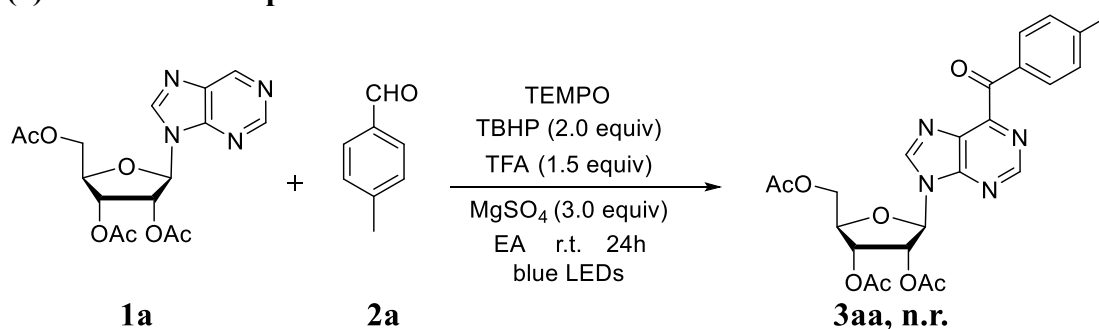

A mixture of (2*R*,3*R*,4*R*,5*R*)-2-(acetoxymethyl)-5-(9*H*-purin-9-yl) tetrahydrofuran-3,4-diyl diacetate **1a** (0.2 mmol), 4-methylbenzaldehyde **2a** (1.0 mmol), TBHP (0.4 mmol), TFA (0.3 mmol), 1,1-diphenylethylene and dry MgSO<sub>4</sub> (0.6 mmol) were stirred in ethyl acetate (2 mL) for 24 hours at room temperature irradiated by blue LEDs. The reaction was completely suppressed.

### (b) Reaction in the presence of 1,1-diphenylethylene

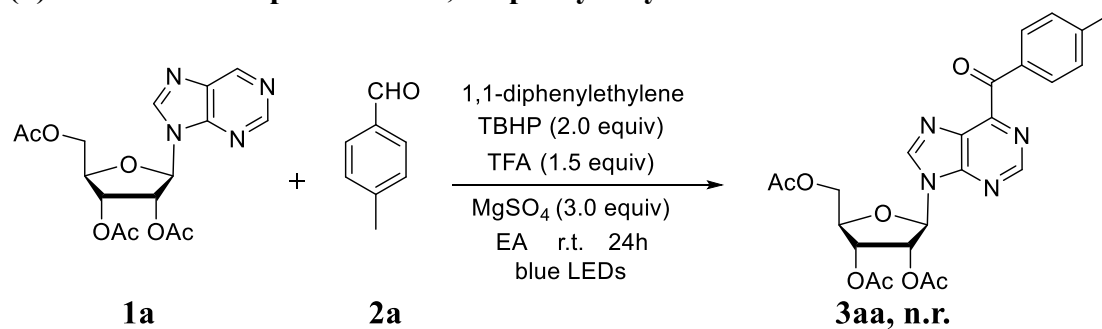

A mixture of (2*R*,3*R*,4*R*,5*R*)-2-(acetoxymethyl)-5-(9*H*-purin-9-yl) tetrahydrofuran-3,4-diyl diacetate **1a** (0.2 mmol), 4-methylbenzaldehyde **2a** (1.0 mmol), TBHP (0.4 mmol), TFA (0.3 mmol), 1,1-diphenylethylene and dry MgSO<sub>4</sub> (0.6 mmol) were stirred in ethyl acetate (2 mL) for 24 hours at room temperature irradiated by blue LEDs. The reaction was completely suppressed.

## 6. UV-visible Study

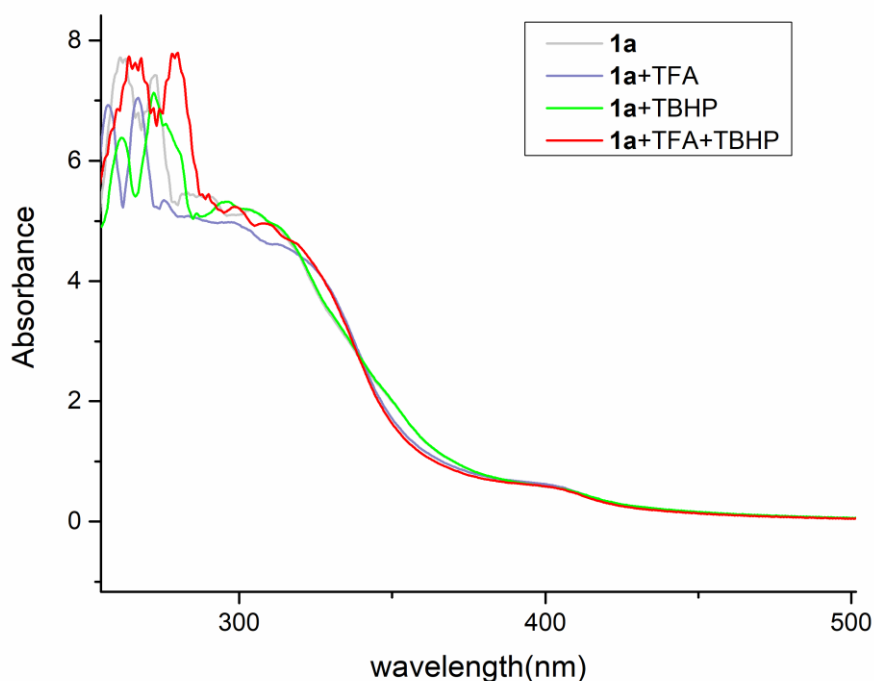

Figure S1. UV-vis absorption spectra.

## 7. Characterization of Compounds

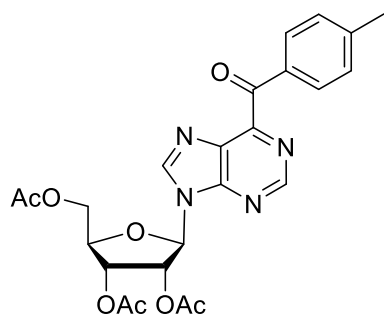

**(2*R*,3*R*,4*R*,5*R*)-2-(acetoxymethyl)-5-(6-(4-methylbenzoyl)-9*H*-purin-9-yl) tetrahydrofuran-3,4-diyl diacetate (3aa):**

Yield: 82%, Yellow oil;  $^1\text{H}$  NMR (400 MHz, Chloroform-*d*)  $\delta$  9.10 (s, 1H), 8.35 (s, 1H), 7.93 (d,  $J = 8.2$  Hz, 2H), 7.28 (d,  $J = 8.2$  Hz, 2H), 6.29 (d,  $J = 5.2$  Hz, 1H), 6.00 (t,  $J = 5.4$  Hz, 1H), 5.67 (t,  $J = 5.4$  Hz, 1H), 4.51 – 4.35 (m, 3H), 2.42 (s, 3H), 2.15 (s, 3H), 2.11 (s, 3H), 2.08 (s, 3H);  $^{13}\text{C}$  NMR (101 MHz, Chloroform-*d*)  $\delta$  190.8, 170.3, 169.6, 169.3, 153.8, 152.7, 152.1, 145.3, 145.0, 132.7, 132.4, 130.9, 129.3, 86.6, 80.5, 73.0, 70.5, 62.9, 21.8, 20.7, 20.5, 20.3; HRMS (ESI):  $m/z$  calcd for  $\text{C}_{24}\text{H}_{24}\text{N}_4\text{NaO}_8^+$   $[\text{M}+\text{Na}]^+$ : 519.1487; found: 519.1477.

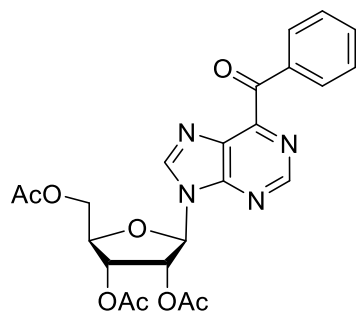

**(2*R*,3*R*,4*R*,5*R*)-2-(acetoxymethyl)-5-(6-benzoyl-9*H*-purin-9-yl) tetrahydrofuran-3,4-diyl diacetate (3ab):**

Yield: 83%, Yellow oil;  $^1\text{H}$  NMR (400 MHz, Chloroform-*d*)  $\delta$  9.12 (s, 1H), 8.37 (s, 1H), 8.04 (d,  $J = 8.2$  Hz, 2H), 7.63 (t,  $J = 7.4$  Hz, 1H), 7.49 ((t,  $J = 7.8$  Hz, 2H), 6.30 (d,  $J = 5.2$  Hz, 1H), 6.01 (t,  $J = 5.4$  Hz, 1H), 5.67 (t,  $J = 5.0$  Hz, 1H), 4.55 – 4.37 (m, 3H), 2.15 (s, 3H), 2.12 (s, 3H), 2.09 (s, 3H);  $^{13}\text{C}$  NMR (100 MHz, Chloroform-*d*)  $\delta$  191.1, 170.2, 169.5, 169.3, 153.4, 152.7, 152.1, 145.1, 135.1, 134.1, 132.4, 130.7, 128.5, 86.6, 80.5, 73.0, 70.5, 62.9, 20.7, 20.5, 20.3; HRMS (ESI):  $m/z$  calcd for  $\text{C}_{23}\text{H}_{22}\text{N}_4\text{NaO}_8^+$   $[\text{M}+\text{Na}]^+$ : 505.1330; found: 505.1323.

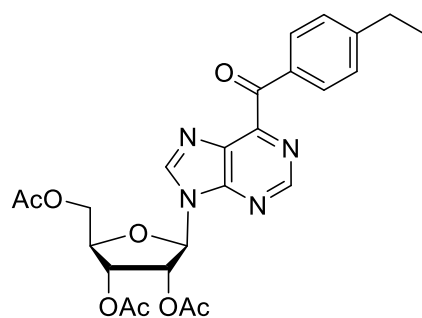

**(2*R*,3*R*,4*R*,5*R*)-2-(acetoxymethyl)-5-(6-(4-ethylbenzoyl)-9*H*-purin-9-yl) tetrahydrofuran-3,4-diyl diacetate (3ac):**

Yield: 74%, Yellow oil;  $^1\text{H}$  NMR (400 MHz, Chloroform-*d*)  $\delta$  9.11 (s, 1H), 8.35 (s, 1H), 7.97 (d,  $J = 8.2$  Hz, 2H), 7.32 (d,  $J = 8.2$  Hz, 2H), 6.30 (d,  $J = 5.2$  Hz, 1H), 6.01 (t,  $J = 5.4$  Hz, 1H), 5.67 (t,  $J = 5.2$  Hz, 1H), 4.53 – 4.36 (m, 3H), 2.72 (q,  $J = 7.6$  Hz, 2H), 2.16 (s, 3H), 2.13 (s, 3H), 2.10 (s, 3H), 1.26 (t,  $J = 7.6$  Hz, 3H);  $^{13}\text{C}$  NMR (100 MHz, Chloroform-*d*)  $\delta$  190.8, 170.3, 169.6, 169.3, 153.8, 152.7, 152.1, 151.4, 144.9, 132.8, 132.4, 131.0, 128.1, 86.6, 80.5, 73.0, 70.5, 62.9, 29.1, 20.7, 20.5, 20.4, 15.0; HRMS (ESI):  $m/z$  calcd for  $\text{C}_{25}\text{H}_{26}\text{N}_4\text{NaO}_8^+$  [ $\text{M}+\text{Na}$ ] $^+$ : 533.1643; found: 533.1641.

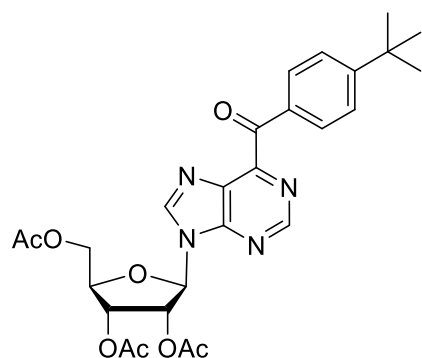

**(2*R*,3*R*,4*R*,5*R*)-2-(acetoxymethyl)-5-(6-(4-(tert-butyl)benzoyl)-9*H*-purin-9-yl) tetrahydrofuran-3,4-diyl diacetate (3ad):**

Yield: 69%, Yellow oil;  $^1\text{H}$  NMR (400 MHz, Chloroform-*d*)  $\delta$  9.11 (s, 1H), 8.37 (s, 1H), 7.98 (d,  $J = 8.4$  Hz, 2H), 7.50 (d,  $J = 8.4$  Hz, 2H), 6.30 (d,  $J = 5.2$  Hz, 1H), 6.01 (t,  $J = 5.4$  Hz, 1H), 5.68 (t,  $J = 5.0$  Hz, 1H), 4.52 – 4.37 (m, 3H), 2.16 (s, 3H), 2.12 (s, 3H), 2.09 (s, 3H), 1.33 (s, 9H);  $^{13}\text{C}$  NMR (101 MHz, Chloroform-*d*)  $\delta$  190.8, 170.3, 169.6, 169.3, 158.1, 153.7, 152.7, 152.1, 145.0, 132.5, 132.3, 130.7, 125.6, 86.6, 80.5, 73.0, 70.5, 62.9, 35.2, 31.0, 20.7, 20.5, 20.4; HRMS (ESI):  $m/z$  calcd for  $\text{C}_{27}\text{H}_{31}\text{N}_4\text{O}_8^+$  [ $\text{M}+\text{H}$ ] $^+$ : 539.2137; found: 539.2127.

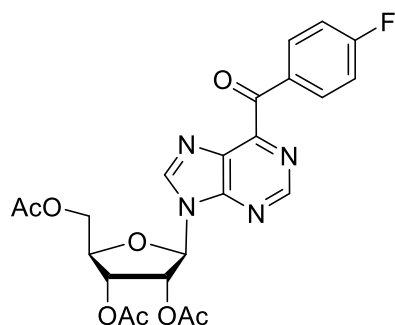

**(2*R*,3*R*,4*R*,5*R*)-2-(acetoxymethyl)-5-(6-(4-fluorobenzoyl)-9*H*-purin-9-yl) tetrahydrofuran-3,4-diyl diacetate (3ae):**

Yield: 47%, Yellow oil; <sup>1</sup>H NMR (400 MHz, Chloroform-*d*) δ 9.12 (s, 1H), 8.37 (s, 1H), 8.15 – 8.10 (m, 2H), 7.21 – 7.12 (m, 2H), 6.29 (d, *J* = 5.2 Hz, 1H), 6.00 (t, *J* = 5.2 Hz, 1H), 5.67 (t, *J* = 5.4 Hz, 1H), 4.52 – 4.37 (m, 3H), 2.16 (s, 3H), 2.12 (s, 3H), 2.09 (s, 3H); <sup>13</sup>C NMR (100 MHz, Chloroform-*d*) δ 189.4, 170.2, 169.6, 169.3, 166.4 (d, *J* = 257.0 Hz), 153.0, 152.8, 152.0, 145.2, 133.6 (d, *J* = 9.6 Hz), 132.5, 131.5 (d, *J* = 2.8 Hz), 115.8 (d, *J* = 22.0 Hz), 86.7, 80.5, 73.0, 70.4, 62.9, 20.7, 20.5, 20.4; HRMS (ESI): *m/z* calcd for C<sub>23</sub>H<sub>22</sub>FN<sub>4</sub>O<sub>8</sub><sup>+</sup> [M+H]<sup>+</sup>: 501.1417; found: 501.1391.

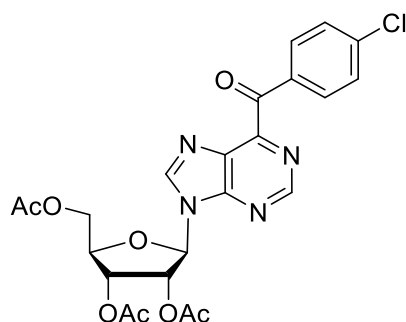

**(2*R*,3*R*,4*R*,5*R*)-2-(acetoxymethyl)-5-(6-(4-chlorobenzoyl)-9*H*-purin-9-yl) tetrahydrofuran-3,4-diyl diacetate (3af):**

Yield: 51%, Yellow oil; <sup>1</sup>H NMR (400 MHz, Chloroform-*d*) δ 9.13 (s, 1H), 8.44 (s, 1H), 8.03 (d, *J* = 8.6 Hz, 2H), 7.48 (d, *J* = 8.0 Hz, 2H), 6.31 (d, *J* = 5.0 Hz, 1H), 6.01 (t, *J* = 5.4 Hz, 1H), 5.67 (t, *J* = 5.2 Hz, 1H), 4.54 – 4.40 (m, 3H), 2.17 (s, 3H), 2.14 (s, 3H), 2.11 (s, 3H); <sup>13</sup>C NMR (100 MHz, Chloroform-*d*) δ 189.8, 170.2, 169.5, 169.3, 152.9, 152.6, 152.0, 145.3, 140.7, 133.5, 132.5, 132.1, 128.9, 86.7, 80.5, 73.0, 70.4, 62.9, 20.7, 20.5, 20.3; HRMS (ESI): *m/z* calcd for C<sub>23</sub>H<sub>21</sub>ClN<sub>4</sub>NaO<sub>8</sub><sup>+</sup> [M+Na]<sup>+</sup>: 539.0941; found: 539.0949.



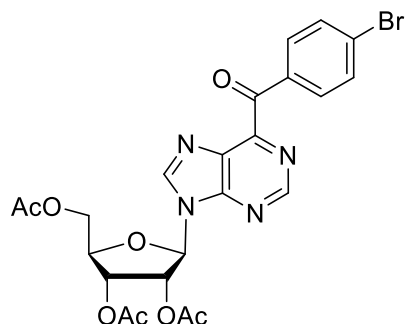

**(2*R*,3*R*,4*R*,5*R*)-2-(acetoxymethyl)-5-(6-(4-bromobenzoyl)-9*H*-purin-9-yl) tetrahydrofuran-3,4-diyl diacetate (3ag):**

Yield: 58%, Yellow oil;  $^1\text{H}$  NMR (400 MHz, Chloroform-*d*)  $\delta$  9.13 (s, 1H), 8.39 (s, 1H), 7.99 – 7.94 (m, 2H), 7.68 – 7.64 (m, 2H), 6.30 (d,  $J = 5.2$  Hz, 1H), 6.00 (t,  $J = 5.4$  Hz, 1H), 5.69 – 5.65 (m, 1H), 4.53 – 4.49 (m, 1H), 4.44 (dd,  $J = 15.4, 3.8$  Hz, 2H), 2.17 (s, 3H), 2.13 (s, 3H), 2.10 (s, 3H);  $^{13}\text{C}$  NMR (100 MHz, Chloroform-*d*)  $\delta$  190.1, 170.3, 169.6, 169.4, 152.9, 152.5, 152.1, 145.4, 133.9, 132.2, 131.9, 131.6, 129.7, 86.7, 80.5, 73.0, 70.5, 62.9, 20.8, 20.5, 20.4; HRMS (ESI):  $m/z$  calcd for  $\text{C}_{23}\text{H}_{21}\text{BrN}_4\text{NaO}_8^+$   $[\text{M}+\text{Na}]^+$ : 585.0415; found: 585.0424.

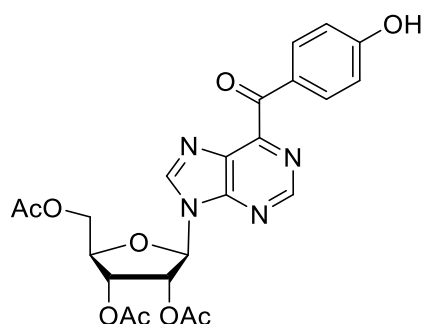

**(2*R*,3*R*,4*R*,5*R*)-2-(acetoxymethyl)-5-(6-(4-hydroxybenzoyl)-9*H*-purin-9-yl) tetrahydrofuran-3,4-diyl diacetate (3ah):**

Yield: 43%, Yellow oil;  $^1\text{H}$  NMR (400 MHz, Chloroform-*d*)  $\delta$  9.11 (s, 1H), 8.43 (s, 1H), 7.74 (d,  $J = 8.4$  Hz, 2H), 6.71 (d,  $J = 8.8$  Hz, 2H), 6.31 (d,  $J = 5.2$  Hz, 1H), 6.01 (t,  $J = 5.4$  Hz, 1H), 5.67 (t,  $J = 5.2$  Hz, 1H), 4.54 – 4.39 (m, 3H), 2.16 (s, 3H), 2.12 (s, 3H), 2.11 (s, 3H);  $^{13}\text{C}$  NMR (100 MHz, Chloroform-*d*)  $\delta$  189.2, 170.4, 169.6, 169.4, 162.6, 154.8, 152.4, 152.2, 144.9, 133.3, 131.5, 127.2, 115.9, 86.8, 80.5, 73.0, 70.4, 62.9, 20.8, 20.5, 20.4; HRMS (ESI):  $m/z$  calcd for  $\text{C}_{23}\text{H}_{23}\text{N}_4\text{O}_9^+$   $[\text{M}+\text{H}]^+$ : 499.1460; found: 499.1465.

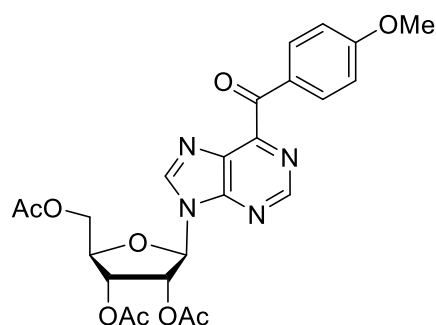

**(2*R*,3*R*,4*R*,5*R*)-2-(acetoxymethyl)-5-(6-(4-methoxybenzoyl)-9*H*-purin-9-yl) tetrahydrofuran-3,4-diyl diacetate (3ai):**

Yield: 64%, Yellow oil;  $^1\text{H}$  NMR (400 MHz, Chloroform-*d*)  $\delta$  9.12 (s, 1H), 8.34 (s, 1H), 8.13 – 8.02 (m, 2H), 7.07 – 6.92 (m, 2H), 6.30 (d,  $J = 5.4$  Hz, 1H), 6.02 (t,  $J = 5.4$  Hz, 1H), 5.68 (dd,  $J = 5.5, 4.4$  Hz, 1H), 4.52 – 4.39 (m, 3H), 3.89 (s, 3H), 2.17 (s, 3H), 2.14 (s, 3H), 2.11 (s, 3H);  $^{13}\text{C}$  NMR (100 MHz, Chloroform-*d*)  $\delta$  189.5, 170.2, 169.5, 169.3, 164.4, 154.1, 152.5, 152.1, 144.8, 133.2, 132.3, 128.1, 113.9, 86.5, 80.4, 72.9, 70.4, 62.9, 55.5, 20.7, 20.5, 20.3; HRMS (ESI):  $m/z$  calcd for  $\text{C}_{24}\text{H}_{24}\text{N}_4\text{NaO}_9^+$   $[\text{M}+\text{Na}]^+$ : 535.1436; found: 535.1431.

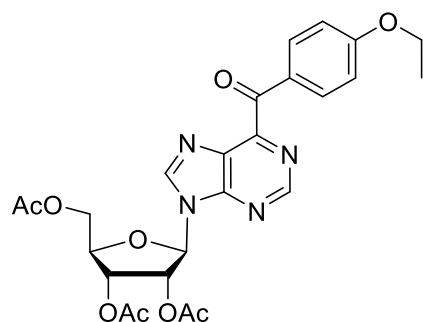

**(2*R*,3*R*,4*R*,5*R*)-2-(acetoxymethyl)-5-(6-(4-ethoxybenzoyl)-9*H*-purin-9-yl) tetrahydrofuran-3,4-diyl diacetate (3aj):**

Yield: 52%, Yellow oil;  $^1\text{H}$  NMR (400 MHz, Chloroform-*d*)  $\delta$  9.10 (s, 1H), 8.34 (s, 1H), 8.03 (d,  $J = 8.8$  Hz, 2H), 6.94 (d,  $J = 8.8$  Hz, 2H), 6.29 (d,  $J = 5.2$  Hz, 1H), 6.00 (t,  $J = 5.4$  Hz, 1H), 5.71 – 5.62 (m, 1H), 4.51 – 4.36 (m, 3H), 4.11 (q,  $J = 7.0$  Hz, 2H), 2.16 (s, 3H), 2.12 (s, 3H), 2.09 (s, 3H), 1.43 (t,  $J = 7.0$  Hz, 3H);  $^{13}\text{C}$  NMR (100 MHz, Chloroform-*d*)  $\delta$  189.4, 170.3, 169.6, 169.3, 163.9, 154.2, 152.5, 152.1, 144.8, 133.3, 132.3, 127.9, 114.3, 86.5, 80.4, 72.9, 70.5, 63.8, 62.9, 20.7, 20.5, 20.4, 14.6; HRMS (ESI):  $m/z$  calcd for  $\text{C}_{25}\text{H}_{26}\text{N}_4\text{NaO}_9^+$   $[\text{M}+\text{Na}]^+$ : 549.1592; found: 549.1590.

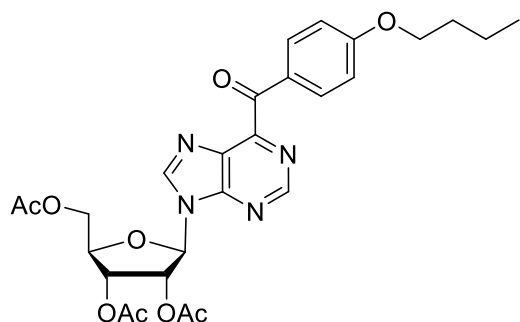

**(2*R*,3*R*,4*R*,5*R*)-2-(acetoxymethyl)-5-(6-(4-butoxybenzoyl)-9*H*-purin-9-yl) tetrahydrofuran-3,4-diyl diacetate (3ak):**

Yield: 63%, Yellow oil;  $^1\text{H}$  NMR (400 MHz, Chloroform-*d*)  $\delta$  9.09 (s, 1H), 8.33 (s, 1H), 8.04 – 7.96 (m, 2H), 6.97 – 6.89 (m, 2H), 6.28 (d,  $J = 5.2$  Hz, 1H), 6.00 (t,  $J = 5.4$  Hz, 1H), 5.66 (t,  $J = 5.0$  Hz, 1H), 4.49 – 4.35 (m, 3H), 4.02 (t,  $J = 6.4$  Hz, 2H), 2.14 (s, 3H), 2.10 (s, 3H), 2.07 (s, 3H), 1.76 (p,  $J = 6.6$  Hz, 2H), 1.54 – 1.40 (m, 2H), 0.95 (t,  $J = 7.4$  Hz, 3H);  $^{13}\text{C}$  NMR (101 MHz, Chloroform-*d*)  $\delta$  189.4, 170.2, 169.5, 169.3, 164.1, 154.2, 152.5, 152.0, 144.8, 133.2, 132.2, 127.8, 114.3, 86.5, 80.4, 72.9, 70.4, 67.9, 62.8, 30.9, 20.7, 20.4, 20.3, 19.0, 13.7; HRMS (ESI):  $m/z$  calcd for  $\text{C}_{27}\text{H}_{31}\text{N}_4\text{O}_9^+$   $[\text{M}+\text{H}]^+$ : 555.2086; found: 555.2077.

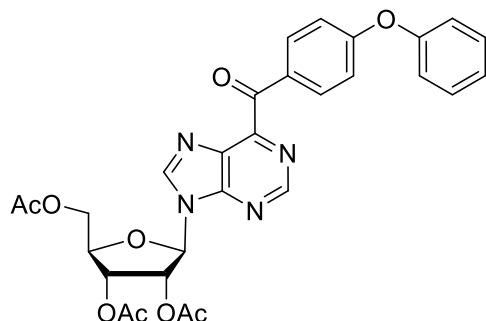

**(2*R*,3*R*,4*R*,5*R*)-2-(acetoxymethyl)-5-(6-(4-phenoxybenzoyl)-9*H*-purin-9-yl) tetrahydrofuran-3,4-diyl diacetate (3al):**

Yield: 60%, Yellow oil;  $^1\text{H}$  NMR (400 MHz, Chloroform-*d*)  $\delta$  9.10 (s, 1H), 8.35 (s, 1H), 8.05 (d,  $J = 8.8$  Hz, 2H), 7.43 – 7.35 (m, 2H), 7.20 (t,  $J = 7.4$  Hz, 1H), 7.08 (d,  $J = 7.4$  Hz, 2H), 7.01 (d,  $J = 8.8$  Hz, 2H), 6.30 (d,  $J = 5.2$  Hz, 1H), 6.00 (t,  $J = 5.4$  Hz, 1H), 5.72 – 5.61 (m, 1H), 4.53 – 4.37 (m, 3H), 2.16 (s, 3H), 2.12 (s, 3H), 2.09 (s, 3H);  $^{13}\text{C}$  NMR (100 MHz, Chloroform-*d*)  $\delta$  189.5, 170.3, 169.6, 169.3, 163.1, 155.0, 153.7, 152.7, 152.1, 144.9, 133.2, 132.4, 130.1, 129.5, 124.9, 120.4, 117.1, 86.6, 80.5, 73.0, 70.5, 62.9, 20.8, 20.5, 20.4; HRMS (ESI):  $m/z$  calcd for  $\text{C}_{29}\text{H}_{26}\text{N}_4\text{NaO}_9^+$   $[\text{M}+\text{Na}]^+$ : 597.1592; found: 597.1595.

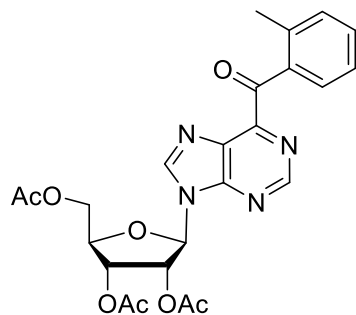

**(2*R*,3*R*,4*R*,5*R*)-2-(acetoxymethyl)-5-(6-(2-methylbenzoyl)-9*H*-purin-9-yl) tetrahydrofuran-3,4-diyl diacetate (3am):**

Yield: 32%, Yellow oil; <sup>1</sup>H NMR (400 MHz, Chloroform-*d*) δ 9.10 (s, 1H), 8.37 (s, 1H), 7.55 – 7.32 (m, 3H), 7.24 (d, *J* = 7.4 Hz, 1H), 6.30 (d, *J* = 5.2 Hz, 1H), 6.01 (t, *J* = 5.2 Hz, 1H), 5.68 (t, *J* = 5.0 Hz, 1H), 4.55 – 4.37 (m, 3H), 2.61 (s, 3H), 2.14 (s, 3H), 2.11 (s, 3H); <sup>13</sup>C NMR (100 MHz, Chloroform-*d*) δ 194.0, 170.3, 169.5, 169.3, 153.7, 152.9, 152.2, 145.2, 140.3, 135.0, 132.6, 132.3, 132.2, 131.9, 125.4, 86.6, 80.5, 73.0, 70.5, 62.9, 21.4, 20.7, 20.5, 20.3; HRMS (ESI): *m/z* calcd for C<sub>24</sub>H<sub>24</sub>N<sub>4</sub>NaO<sub>8</sub><sup>+</sup> [*M*+Na]<sup>+</sup>: 519.1487; found: 519.1489.

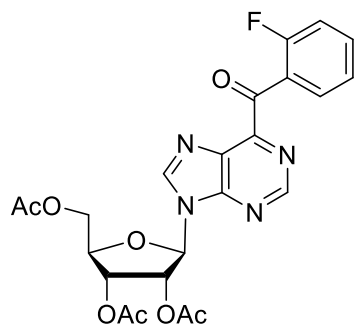

**(2*R*,3*R*,4*R*,5*R*)-2-(acetoxymethyl)-5-(6-(2-fluorobenzoyl)-9*H*-purin-9-yl) tetrahydrofuran-3,4-diyl diacetate (3an):**

Yield: 43%, Yellow oil; <sup>1</sup>H NMR (400 MHz, Chloroform-*d*) δ 9.08 (s, 1H), 8.39 (s, 1H), 7.91 (td, *J* = 7.4, 1.8 Hz, 1H), 7.66 – 7.56 (m, 1H), 7.32 (td, *J* = 7.6, 1.0 Hz, 1H), 7.11 (ddd, *J* = 10.2, 8.2, 1.0 Hz, 1H), 6.30 (d, *J* = 5.2 Hz, 1H), 5.99 (t, *J* = 5.4 Hz, 1H), 5.68 (t, *J* = 5.0 Hz, 1H), 4.51 – 4.36 (m, 3H), 2.15 (s, 3H), 2.11 (s, 3H), 2.09 (s, 3H); <sup>13</sup>C NMR (100 MHz, Chloroform-*d*) δ 190.0, 170.3, 169.6, 169.3, 161.7 (d, *J* = 256.2 Hz), 153.1, 152.4, 152.3, 145.5, 135.4 (d, *J* = 8.8 Hz), 131.5, 131.5 (d, *J* = 1.8 Hz), 125.2 (d, *J* = 12.0 Hz), 124.6 (d, *J* = 3.4 Hz), 116.4 (d, *J* = 21.8 Hz), 86.6, 80.5, 73.0, 70.5, 62.9, 20.7, 20.5, 20.4; HRMS (ESI): *m/z* calcd for C<sub>23</sub>H<sub>21</sub>FN<sub>4</sub>NaO<sub>8</sub><sup>+</sup> [*M*+Na]<sup>+</sup>: 523.1236; found: 523.1230.

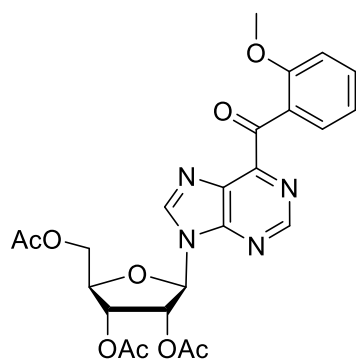

**(2*R*,3*R*,4*R*,5*R*)-2-(acetoxymethyl)-5-(6-(2-methoxybenzoyl)-9*H*-purin-9-yl) tetrahydrofuran-3,4-diyl diacetate (3ao):**

Yield: 56%, Yellow oil;  $^1\text{H}$  NMR (400 MHz, Chloroform-*d*)  $\delta$  9.01 (s, 1H), 7.85 – 7.76 (m, 1H), 7.54 (ddd,  $J = 8.6, 7.4, 1.8$  Hz, 1H), 7.09 (td,  $J = 7.4, 0.8$  Hz, 1H), 6.92 (d,  $J = 8.2$  Hz, 1H), 6.27 (d,  $J = 5.2$  Hz, 1H), 5.96 (t,  $J = 5.4$  Hz, 1H), 5.66 (t,  $J = 5.0$  Hz, 1H), 4.49 – 4.34 (m, 3H), 3.46 (s, 3H), 2.14 (s, 3H), 2.09 (s, 3H), 2.06 (s, 3H);  $^{13}\text{C}$  NMR (100 MHz, Chloroform-*d*)  $\delta$  192.5, 170.2, 169.5, 169.3, 159.4, 154.4, 152.6, 152.1, 144.7, 134.8, 131.1, 131.0, 126.5, 120.9, 111.8, 86.5, 80.3, 72.9, 70.4, 62.8, 55.5, 20.7, 20.4, 20.3; HRMS (ESI):  $m/z$  calcd for  $\text{C}_{24}\text{H}_{24}\text{N}_4\text{NaO}_9^+$   $[\text{M}+\text{Na}]^+$ : 535.1436; found: 535.1444.

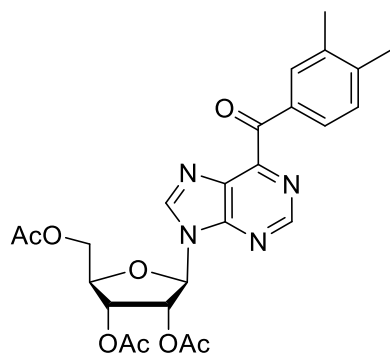

**(2*R*,3*R*,4*R*,5*R*)-2-(acetoxymethyl)-5-(6-(3,4-dimethylbenzoyl)-9*H*-purin-9-yl) tetrahydrofuran-3,4-diyl diacetate (3ap):**

Yield: 48%, Yellow oil;  $^1\text{H}$  NMR (400 MHz, Chloroform-*d*)  $\delta$  9.11 (s, 1H), 8.34 (s, 1H), 7.81 (d,  $J = 1.8$  Hz, 1H), 7.72 (dd,  $J = 7.8, 1.8$  Hz, 1H), 7.23 (d,  $J = 7.8$  Hz, 1H), 6.29 (d,  $J = 5.2$  Hz, 1H), 6.01 (t,  $J = 5.4$  Hz, 1H), 5.68 (t,  $J = 5.0$  Hz, 1H), 4.53 – 4.36 (m, 3H), 2.32 (s, 3H), 2.30 (s, 3H), 2.16 (s, 3H), 2.12 (s, 3H), 2.09 (s, 3H);  $^{13}\text{C}$  NMR (100 MHz, Chloroform-*d*)  $\delta$  191.1, 170.3, 169.6, 169.3, 154.0, 152.6, 152.2, 144.9, 144.2, 137.1, 133.0, 132.3, 131.5, 129.8, 128.7, 86.6, 80.4, 72.9, 70.5, 62.9, 20.7, 20.5, 20.4, 20.2, 19.7; HRMS (ESI):  $m/z$  calcd for  $\text{C}_{25}\text{H}_{26}\text{N}_4\text{NaO}_8^+$   $[\text{M}+\text{Na}]^+$ : 533.1643; found: 533.1644.

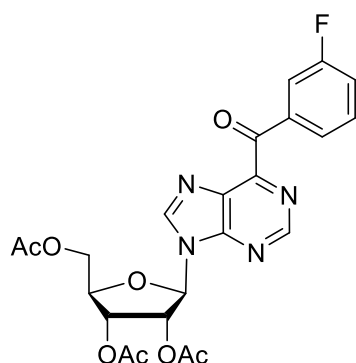

**(2*R*,3*R*,4*R*,5*R*)-2-(acetoxymethyl)-5-(6-(3-fluorobenzoyl)-9*H*-purin-9-yl) tetrahydrofuran-3,4-diyl diacetate (3aq):**

Yield: 35%, Yellow oil; <sup>1</sup>H NMR (400 MHz, Chloroform-*d*) δ 9.14 (s, 1H), 8.40 (s, 1H), 7.88 – 7.79 (m, 2H), 7.49 (td, *J* = 8.0, 5.4 Hz, 1H), 7.38 – 7.32 (m, 1H), 6.31 (d, *J* = 5.2 Hz, 1H), 6.01 (t, *J* = 5.4 Hz, 1H), 5.67 (dd, *J* = 5.4, 4.6 Hz, 1H), 4.53 – 4.48 (m, 1H), 4.47 – 4.39 (m, 2H), 2.17 (s, 3H), 2.14 (s, 3H), 2.11 (s, 3H); <sup>13</sup>C NMR (100 MHz, Chloroform-*d*) δ 189.8 (d, *J* = 2.2 Hz), 170.3, 169.6, 169.3, 162.6 (d, *J* = 248.0 Hz), 152.9, 152.4, 152.0, 145.4, 137.1 (d, *J* = 6.8 Hz), 132.4, 130.2 (d, *J* = 7.8 Hz), 126.8 (d, *J* = 3.2 Hz), 121.2 (d, *J* = 21.6 Hz), 117.3 (d, *J* = 22.8 Hz), 86.7, 80.5, 73.0, 70.5, 62.9, 20.8, 20.5, 20.4; HRMS (ESI): *m/z* calcd for C<sub>23</sub>H<sub>22</sub>FN<sub>4</sub>O<sub>8</sub><sup>+</sup> [M+H]<sup>+</sup>: 501.1417; found: 501.1379.

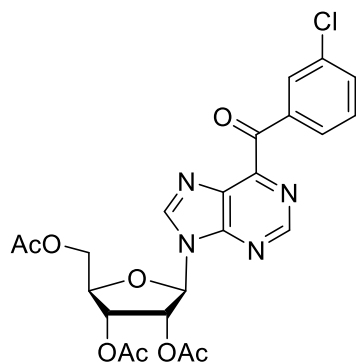

**(2*R*,3*R*,4*R*,5*R*)-2-(acetoxymethyl)-5-(6-(3-chlorobenzoyl)-9*H*-purin-9-yl) tetrahydrofuran-3,4-diyl diacetate (3ar):**

Yield: 39%, Yellow oil; <sup>1</sup>H NMR (400 MHz, Chloroform-*d*) δ 9.13 (s, 1H), 8.39 (s, 1H), 8.06 (t, *J* = 1.9 Hz, 1H), 7.95 (dt, *J* = 7.8, 1.3 Hz, 1H), 7.60 (ddd, *J* = 8.0, 2.2, 1.1 Hz, 1H), 7.44 (t, *J* = 7.9 Hz, 1H), 6.30 (d, *J* = 5.2 Hz, 1H), 6.00 (t, *J* = 5.4 Hz, 1H), 5.72 – 5.62 (m, 1H), 4.52 – 4.38 (m, 3H), 2.16 (s, 3H), 2.12 (s, 3H), 2.09 (s, 3H); <sup>13</sup>C NMR (101 MHz, Chloroform-*d*) δ 189.8, 170.3, 169.6, 169.3, 152.9, 152.2, 152.0, 145.4, 136.7, 134.8, 134.0, 132.5, 130.6, 129.8, 128.9, 86.7, 80.5, 73.0, 70.4, 62.9, 20.7, 20.5, 20.4; HRMS (ESI): *m/z* calcd for C<sub>23</sub>H<sub>22</sub>ClN<sub>4</sub>O<sub>8</sub><sup>+</sup> [M+H]<sup>+</sup>: 517.1121; found: 517.1117.

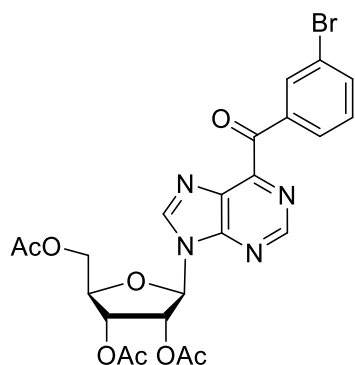

**(2*R*,3*R*,4*R*,5*R*)-2-(acetoxymethyl)-5-(6-(3-bromobenzoyl)-9*H*-purin-9-yl) tetrahydrofuran-3,4-diyl diacetate (3as):**

Yield: 46%, Yellow oil;  $^1\text{H}$  NMR (400 MHz, Chloroform-*d*)  $\delta$  9.14 (s, 1H), 8.40 (s, 1H), 8.23 (t,  $J = 1.8$  Hz, 1H), 8.01 (dt,  $J = 7.8, 1.4$  Hz, 1H), 7.77 (ddd,  $J = 8.0, 2.0, 1.0$  Hz, 1H), 7.39 (t,  $J = 7.8$  Hz, 1H), 6.31 (d,  $J = 5.2$  Hz, 1H), 6.01 (t,  $J = 5.2$  Hz, 1H), 5.67 (t,  $J = 5.0$  Hz, 1H), 4.52 – 4.39 (m, 3H), 2.17 (s, 3H), 2.14 (s, 3H), 2.11 (s, 3H);  $^{13}\text{C}$  NMR (101 MHz, Chloroform-*d*)  $\delta$  189.8, 170.4, 169.6, 169.4, 153.0, 152.2, 152.1, 145.5, 136.9, 133.6, 132.5, 130.1, 129.5, 128.6, 122.8, 86.7, 80.6, 73.1, 70.5, 63.0, 20.8, 20.6, 20.4; HRMS (ESI):  $m/z$  calcd for  $\text{C}_{23}\text{H}_{22}\text{BrN}_4\text{O}_8^+$   $[\text{M}+\text{H}]^+$ : 563.0596; found: 563.0597.

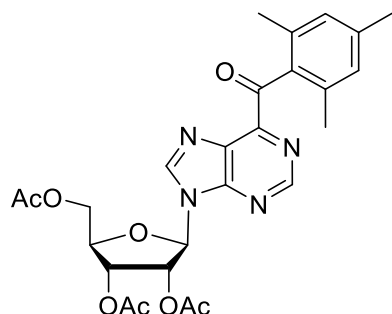

**(2*R*,3*R*,4*R*,5*R*)-2-(acetoxymethyl)-5-(6-(2,4,6-trimethylbenzoyl)-9*H*-purin-9-yl) tetrahydrofuran-3,4-diyl diacetate (3at):**

Yield: 34%, Yellow oil;  $^1\text{H}$  NMR (400 MHz, Chloroform-*d*)  $\delta$  9.07 (s, 1H), 8.46 (s, 1H), 6.91 (s, 2H), 6.29 (d,  $J = 5.0$  Hz, 1H), 5.98 (t,  $J = 5.4$  Hz, 1H), 5.66 (t,  $J = 5.2$  Hz, 1H), 4.52 – 4.35 (m, 3H), 2.32 (s, 3H), 2.15 (s, 3H), 2.13 (s, 6H), 2.12 (s, 3H), 2.09 (s, 3H);  $^{13}\text{C}$  NMR (10 MHz, Chloroform-*d*)  $\delta$  199.7, 170.2, 169.5, 169.3, 153.7, 152.6, 150.4, 146.2, 139.6, 136.1, 135.0, 131.7, 128.5, 86.7, 80.3, 73.0, 70.3, 62.8, 21.3, 20.7, 20.5, 20.3, 19.7; HRMS (ESI):  $m/z$  calcd for  $\text{C}_{26}\text{H}_{29}\text{N}_4\text{O}_8^+$   $[\text{M}+\text{H}]^+$ : 525.1980; found: 525.1981.

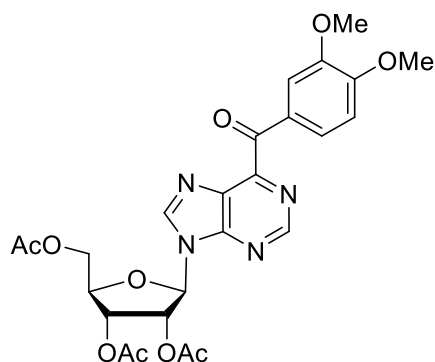

**(2*R*,3*R*,4*R*,5*R*)-2-(acetoxymethyl)-5-(6-(3,4-dimethoxybenzoyl)-9*H*-purin-9-yl) tetrahydrofuran-3,4-diyl diacetate (3au):**

Yield: 32%, Yellow oil;  $^1\text{H}$  NMR (400 MHz, Chloroform-*d*)  $\delta$  9.11 (s, 1H), 8.34 (s, 1H), 7.75 (d,  $J = 2.0$  Hz, 1H), 7.54 (dd,  $J = 8.4, 2.0$  Hz, 1H), 6.88 (d,  $J = 8.4$  Hz, 1H), 6.29 (d,  $J = 5.2$  Hz, 1H), 6.01 (t,  $J = 5.2$  Hz, 1H), 5.67 (t,  $J = 5.0$  Hz, 1H), 4.53 – 4.36 (m, 3H), 3.95 (d,  $J = 1.6$  Hz, 6H), 2.16 (s, 3H), 2.13 (s, 3H), 2.10 (s, 3H);  $^{13}\text{C}$  NMR (100 MHz, Chloroform-*d*)  $\delta$  189.5, 170.2, 169.5, 169.3, 154.4, 154.3, 152.5, 152.1, 149.3, 144.8, 132.4, 128.3, 127.2, 111.5, 109.9, 86.6, 80.5, 73.0, 70.5, 62.9, 56.1, 56.1, 20.7, 20.5, 20.4; HRMS (ESI):  $m/z$  calcd for  $\text{C}_{25}\text{H}_{26}\text{N}_4\text{NaO}_{10}^+$   $[\text{M}+\text{Na}]^+$ : 565.1542; found: 565.1538.

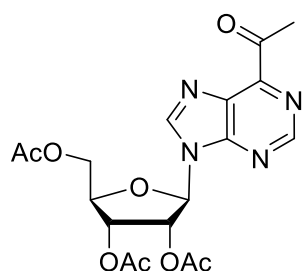

**(2*R*,3*R*,4*R*,5*R*)-2-(acetoxymethyl)-5-(6-acetyl-9*H*-purin-9-yl) tetrahydrofuran-3,4-diyl diacetate (3av):**

Yield: 65%, Yellow oil;  $^1\text{H}$  NMR (400 MHz, Chloroform-*d*)  $\delta$  9.11 (s, 1H), 8.42 (s, 1H), 6.28 (d,  $J = 5.2$  Hz, 1H), 5.96 (t,  $J = 5.4$  Hz, 1H), 5.64 (t,  $J = 5.2$  Hz, 1H), 4.50 – 4.34 (m, 3H), 2.88 (s, 3H), 2.15 (s, 3H), 2.12 (s, 3H), 2.07 (s, 3H);  $^{13}\text{C}$  NMR (100 MHz, Chloroform-*d*)  $\delta$  198.7, 170.2, 169.5, 169.3, 153.7, 152.2, 149.2, 145.9, 131.5, 86.6, 80.4, 73.0, 70.4, 62.9, 27.9, 20.7, 20.5, 20.3; HRMS (ESI):  $m/z$  calcd for  $\text{C}_{18}\text{H}_{20}\text{N}_4\text{NaO}_8^+$   $[\text{M}+\text{Na}]^+$ : 433.1174; found: 433.1167.



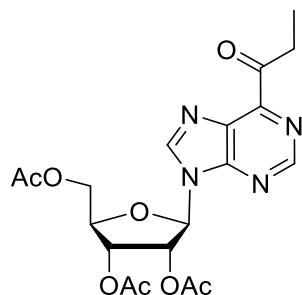

**(2*R*,3*R*,4*R*,5*R*)-2-(acetoxymethyl)-5-(6-propionyl-9*H*-purin-9-yl) tetrahydrofuran-3,4-diyl diacetate (3aw):**

Yield: 70%, Yellow oil;  $^1\text{H}$  NMR (400 MHz, Chloroform-*d*)  $\delta$  9.10 (s, 1H), 8.43 (s, 1H), 6.28 (d,  $J = 5.2$  Hz, 1H), 5.96 (t,  $J = 5.2$  Hz, 1H), 5.65 (t,  $J = 5.2$  Hz, 1H), 4.50 – 4.36 (m, 3H), 3.35 (q,  $J = 7.2$  Hz, 2H), 2.15 (s, 3H), 2.12 (s, 3H), 2.07 (s, 3H), 1.27 (t,  $J = 7.2$  Hz, 3H);  $^{13}\text{C}$  NMR (100 MHz, Chloroform-*d*)  $\delta$  201.3, 170.3, 169.5, 169.3, 153.6, 152.3, 149.7, 145.7, 131.4, 86.6, 80.5, 73.0, 70.5, 62.9, 33.7, 20.7, 20.5, 20.3, 7.6; HRMS (ESI):  $m/z$  calcd for  $\text{C}_{19}\text{H}_{22}\text{N}_4\text{NaO}_8^+ [\text{M}+\text{Na}]^+$ : 457.1330; found: 457.1336.

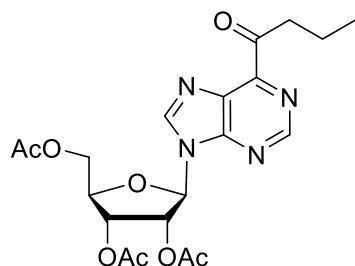

**(2*R*,3*R*,4*R*,5*R*)-2-(acetoxymethyl)-5-(6-butyryl-9*H*-purin-9-yl) tetrahydrofuran-3,4-diyl diacetate (3ax):**

Yield: 79%, Yellow oil;  $^1\text{H}$  NMR (400 MHz, Chloroform-*d*)  $\delta$  9.09 (s, 1H), 8.41 (s, 1H), 6.27 (d,  $J = 5.2$  Hz, 1H), 5.96 (t,  $J = 5.4$  Hz, 1H), 5.68 – 5.61 (m, 1H), 4.53 – 4.36 (m, 3H), 3.30 (t,  $J = 7.4$  Hz, 2H), 2.23 – 2.03 (m, 10H), 1.82 (q,  $J = 7.4$  Hz, 2H), 1.03 (t,  $J = 7.4$  Hz, 3H);  $^{13}\text{C}$  NMR (101 MHz, Chloroform-*d*)  $\delta$  200.8, 170.3, 169.6, 169.3, 153.6, 152.3, 149.7, 145.7, 131.5, 86.6, 80.4, 73.0, 70.5, 62.9, 42.0, 20.7, 20.5, 20.3, 17.2, 13.8; HRMS (ESI):  $m/z$  calcd for  $\text{C}_{20}\text{H}_{25}\text{N}_4\text{O}_8^+ [\text{M}+\text{H}]^+$ : 449.1667; found: 449.1678.

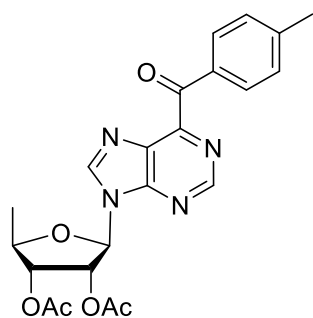

**(2*R*,3*R*,4*R*,5*R*)-2-methyl-5-(6-(4-methylbenzoyl)-9*H*-purin-9-yl) tetrahydrofuran-3,4-diyl diacetate (3ba):**

Yield: 80%, Yellow oil; <sup>1</sup>H NMR (400 MHz, Chloroform-*d*) δ 9.13 (s, 1H), 8.27 (s, 1H), 7.94 (d, *J* = 8.2 Hz, 2H), 7.30 (d, *J* = 8.0 Hz, 2H), 6.19 (d, *J* = 5.0 Hz, 1H), 6.06 (t, *J* = 5.2 Hz, 1H), 5.44 (t, *J* = 5.2 Hz, 1H), 4.38 (dt, *J* = 11.6, 6.2 Hz, 1H), 2.43 (s, 3H), 2.16 (s, 3H), 2.10 (s, 3H), 1.55 (d, *J* = 6.4 Hz, 3H); <sup>13</sup>C NMR (100 MHz, Chloroform-*d*) δ 190.8, 169.7, 169.4, 153.7, 152.6, 152.1, 145.3, 145.2, 132.7, 132.5, 130.9, 129.3, 87.0, 79.0, 74.4, 73.0, 21.8, 20.5, 20.4, 18.7; HRMS (ESI): *m/z* calcd for C<sub>22</sub>H<sub>22</sub>N<sub>4</sub>NaO<sub>6</sub><sup>+</sup> [M+Na]<sup>+</sup>: 461.1432; found: 461.1423.

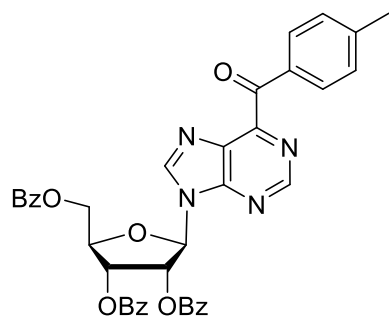

**(2*R*,3*R*,4*R*,5*R*)-2-((benzyloxy)methyl)-5-(6-(4-methylbenzoyl)-9*H*-purin-9-yl) tetrahydrofuran-3,4-diyl dibenzoate (3ca):**

Yield: 57%, Yellow oil; <sup>1</sup>H NMR (400 MHz, Chloroform-*d*) δ 8.94 (s, 1H), 8.36 (s, 1H), 8.15 – 8.08 (m, 2H), 8.06 – 7.99 (m, 2H), 7.97 – 7.89 (m, 4H), 7.64 – 7.51 (m, 3H), 7.50 – 7.33 (m, 6H), 7.31 – 7.24 (m, 2H), 6.56 – 6.47 (m, 2H), 6.30 (t, *J* = 5.2 Hz, 1H), 4.96 (dd, *J* = 12.2, 3.2 Hz, 1H), 4.91 – 4.84 (m, 1H), 4.73 (dd, *J* = 12.2, 4.2 Hz, 1H), 2.42 (s, 3H); <sup>13</sup>C NMR (101 MHz, Chloroform-*d*) δ 190.7, 166.1, 165.3, 165.1, 153.7, 152.7, 152.1, 145.4, 145.2, 133.9, 133.8, 133.5, 132.7, 132.4, 130.8, 129.8, 129.8, 129.7, 129.2, 129.2, 128.6, 128.6, 128.6, 128.5, 128.2, 87.2, 80.9, 73.6, 71.4, 63.34, 21.8; HRMS (ESI): *m/z* calcd for C<sub>39</sub>H<sub>31</sub>N<sub>4</sub>O<sub>8</sub><sup>+</sup> [M+H]<sup>+</sup>: 683.2137; found: 683.2135.

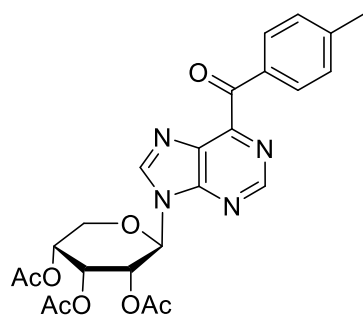

**(2*R*,3*R*,4*R*,5*R*)-2-(6-(4-methylbenzoyl)-9*H*-purin-9-yl) tetrahydro-2*H*-pyran-3,4,5-triyl triacetate (3da):**

Yield: 82%, Yellow oil; <sup>1</sup>H NMR (400 MHz, Chloroform-*d*) δ 9.12 (s, 1H), 8.31 (s, 1H), 7.93 (d, *J* = 8.2 Hz, 2H), 7.28 (d, *J* = 8.0 Hz, 2H), 6.13 (d, *J* = 9.6 Hz, 1H), 5.88 (t, *J* = 2.8 Hz, 1H), 5.75 (dd, *J* = 9.6, 2.8 Hz, 1H), 5.27 (ddd, *J* = 10.4, 6.0, 2.8 Hz, 1H), 4.14 – 4.00 (m, 2H), 2.42 (s, 3H), 2.28 (s, 3H), 2.06 (s, 3H), 1.81 (s, 3H); <sup>13</sup>C NMR (101 MHz, Chloroform-*d*) δ 190.8, 169.8, 169.3, 168.8, 153.6, 153.2, 152.3, 145.3, 144.6, 132.6, 131.8, 130.9, 129.3, 78.7, 68.0, 67.7, 65.7, 63.8, 21.8, 20.8, 20.6, 20.3; HRMS (ESI): *m/z* calcd for C<sub>24</sub>H<sub>25</sub>N<sub>4</sub>O<sub>8</sub><sup>+</sup> [M+H]<sup>+</sup>: 497.1667; found: 497.1658.

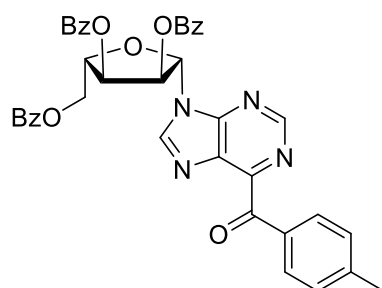

**(2*R*,3*S*,4*S*,5*R*)-2-((benzoyloxy)methyl)-5-(6-(4-methylbenzoyl)-9*H*-purin-9-yl) tetrahydrofuran-3,4-diyl dibenzoate (3ea):**

Yield: 68%, Yellow oil; <sup>1</sup>H NMR (400 MHz, Chloroform-*d*) δ 8.94 (s, 1H), 8.36 (s, 1H), 8.14 – 8.09 (m, 2H), 8.05 – 8.01 (m, 2H), 7.95 – 7.90 (m, 4H), 7.63 – 7.53 (m, 3H), 7.48 – 7.35 (m, 6H), 7.28 (d, *J* = 8.2 Hz, 2H), 6.55 – 6.49 (m, 2H), 6.30 (t, *J* = 5.2 Hz, 1H), 4.96 (dd, *J* = 12.2, 3.2 Hz, 1H), 4.90 – 4.85 (m, 1H), 4.73 (dd, *J* = 12.2, 4.2 Hz, 1H), 2.42 (s, 3H); <sup>13</sup>C NMR (101 MHz, CDCl<sub>3</sub>) δ 190.8, 166.1, 165.3, 165.1, 153.7, 152.7, 152.1, 145.4, 145.2, 133.9, 133.8, 133.5, 132.7, 132.4, 130.8, 129.8, 129.8, 129.7, 129.2, 129.2, 128.6, 128.6, 128.5, 128.5, 128.2, 87.2, 80.9, 73.6, 71.3, 63.4, 21.8; HRMS (ESI): *m/z* calcd for C<sub>39</sub>H<sub>30</sub>N<sub>4</sub>NaO<sub>8</sub><sup>+</sup> [M+Na]<sup>+</sup>: 705.1956; found: 705.1949.

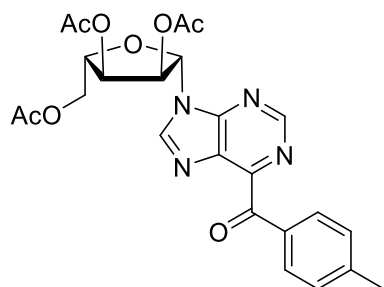

**(2*R*,3*S*,4*S*,5*R*)-2-(acetoxymethyl)-5-(6-(4-methylbenzoyl)-9*H*-purin-9-yl) tetrahydrofuran-3,4-diyl diacetate (3fa):**

Yield: 80%, Yellow oil; <sup>1</sup>H NMR (400 MHz, Chloroform-*d*) δ 9.13 (s, 1H), 8.33 (s, 1H), 7.93 (d, *J* = 8.2 Hz, 2H), 7.29 (d, *J* = 8.0 Hz, 2H), 6.14 (d, *J* = 9.6 Hz, 1H), 5.89 (d, *J* = 2.8 Hz, 1H), 5.75 (dd, *J* = 9.6, 2.8 Hz, 1H), 5.28 (ddd, *J* = 10.4, 6.0, 2.8 Hz, 1H), 4.17 – 4.00 (m, 2H), 2.42 (s, 3H), 2.28 (s, 3H), 2.06 (s, 3H), 1.82 (s, 3H); <sup>13</sup>C NMR (101 MHz, CDCl<sub>3</sub>) δ 190.9, 169.8, 169.4, 168.8, 153.6, 153.2, 152.3, 145.4, 144.7, 132.7, 130.9, 129.3, 129.1, 78.8, 68.1, 67.8, 65.8, 63.8, 21.9, 20.9, 20.6, 20.4; HRMS (ESI): *m/z* calcd for C<sub>24</sub>H<sub>24</sub>N<sub>4</sub>NaO<sub>8</sub><sup>+</sup> [M+Na]<sup>+</sup>: 519.1487; found: 519.1479.

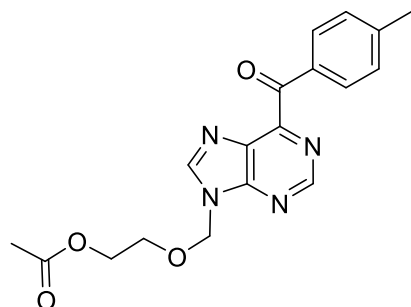

**2-((6-(4-methylbenzoyl)-9*H*-purin-9-yl) methoxy) ethyl acetate (3ga):**

Yield: 81%, Yellow oil; <sup>1</sup>H NMR (400 MHz, Chloroform-*d*) δ 9.11 (s, 1H), 8.34 (s, 1H), 7.93 (d, *J* = 8.2 Hz, 2H), 7.28 (d, *J* = 8.2 Hz, 2H), 5.77 (s, 2H), 4.19 (t, *J* = 4.6 Hz, 2H), 3.80 (t, *J* = 4.6 Hz, 2H), 2.41 (s, 3H), 2.01 (s, 3H); <sup>13</sup>C NMR (101 MHz, CDCl<sub>3</sub>) δ 190.9, 170.7, 153.4, 152.3, 146.5, 145.3, 132.7, 131.4, 130.8, 129.2, 72.8, 68.0, 62.7, 21.8, 20.7. HRMS (ESI): *m/z* calcd for C<sub>18</sub>H<sub>19</sub>N<sub>4</sub>O<sub>4</sub>[M+H]<sup>+</sup>: 355.1401; found: 355.1408.

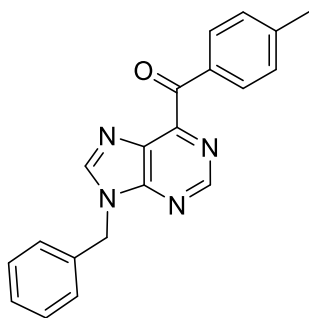

**(9-benzyl-9H-purin-6-yl) (p-tolyl) methanone (3ha):**

Yield: 56%, Yellow oil;  $^1\text{H}$  NMR (400 MHz, Chloroform-*d*)  $\delta$  9.05 (s, 1H), 7.87 (d,  $J$  = 8.2 Hz, 2H), 7.34 – 7.22 (m, 5H), 7.20 (d,  $J$  = 7.8 Hz, 2H), 5.42 (s, 2H), 2.34 (s, 3H);  $^{13}\text{C}$  NMR (101 MHz, Chloroform-*d*)  $\delta$  191.2, 153.2, 153.1, 151.9, 146.5, 145.1, 134.6, 132.8, 131.5, 130.8, 129.2, 129.1, 128.7, 127.9, 47.4, 21.8; HRMS (ESI):  $m/z$  calcd for  $\text{C}_{20}\text{H}_{16}\text{N}_4\text{NaO}^+$  [ $\text{M}+\text{Na}$ ] $^+$ : 351.1217; found: 351.1215.

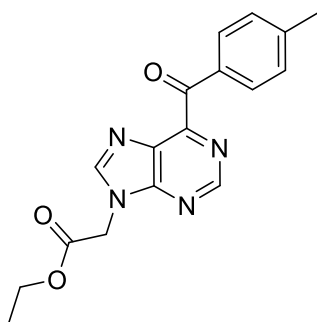

**ethyl 2-(6-(4-methylbenzoyl)-9H-purin-9-yl) acetate (3ia):**

Yield: 78%, Yellow solid; mp 129–133 °C;  $^1\text{H}$  NMR (400 MHz, Chloroform-*d*)  $\delta$  9.09 (s, 1H), 8.28 (s, 1H), 7.94 (d,  $J$  = 8.2 Hz, 2H), 7.28 (d,  $J$  = 7.8 Hz, 2H), 5.11 (s, 2H), 4.28 (q,  $J$  = 7.2 Hz, 2H), 2.42 (s, 3H), 1.31 (t,  $J$  = 7.2 Hz, 3H).  $^{13}\text{C}$  NMR (101 MHz, Chloroform-*d*)  $\delta$  191.1, 166.7, 153.3, 153.2, 152.2, 147.0, 145.3, 132.9, 131.3, 131.0, 129.3, 62.7, 44.3, 21.9, 14.1. HRMS (ESI):  $m/z$  calcd for  $\text{C}_{17}\text{H}_{17}\text{N}_4\text{O}_3^+$  [ $\text{M}+\text{H}$ ] $^+$ : 325.1296; found: 325.1297.

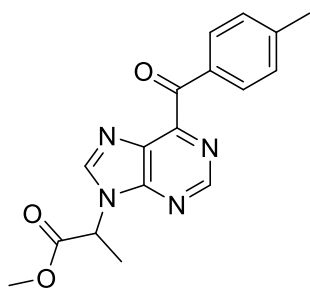

**methyl 2-(6-(4-methylbenzoyl)-9H-purin-9-yl) propanoate (3ja):**

Yield: 76%, Yellow oil;  $^1\text{H}$  NMR (400 MHz, Chloroform-*d*)  $\delta$  9.08 (s, 1H), 8.38 (s, 1H), 7.95 (d,  $J = 8.2$  Hz, 2H), 7.29 (d,  $J = 7.6$  Hz, 2H), 5.59 (q,  $J = 7.6$  Hz, 1H), 3.80 (s, 3H), 2.42 (s, 3H), 1.94 (d,  $J = 7.6$  Hz, 3H).  $^{13}\text{C}$  NMR (101 MHz, Chloroform-*d*)  $\delta$  191.1, 170.1, 153.2, 153.0, 151.9, 145.2, 132.8, 131.4, 130.9, 129.3, 53.3, 52.0, 21.9, 18.0. HRMS (ESI):  $m/z$  calcd for  $\text{C}_{17}\text{H}_{17}\text{N}_4\text{O}_3^+$   $[\text{M}+\text{H}]^+$ : 325.1296; found: 325.1285.

## 8. NMR Spectra of Products

$^1\text{H-NMR}$  spectrum for **3aa** (in  $\text{CDCl}_3$ )

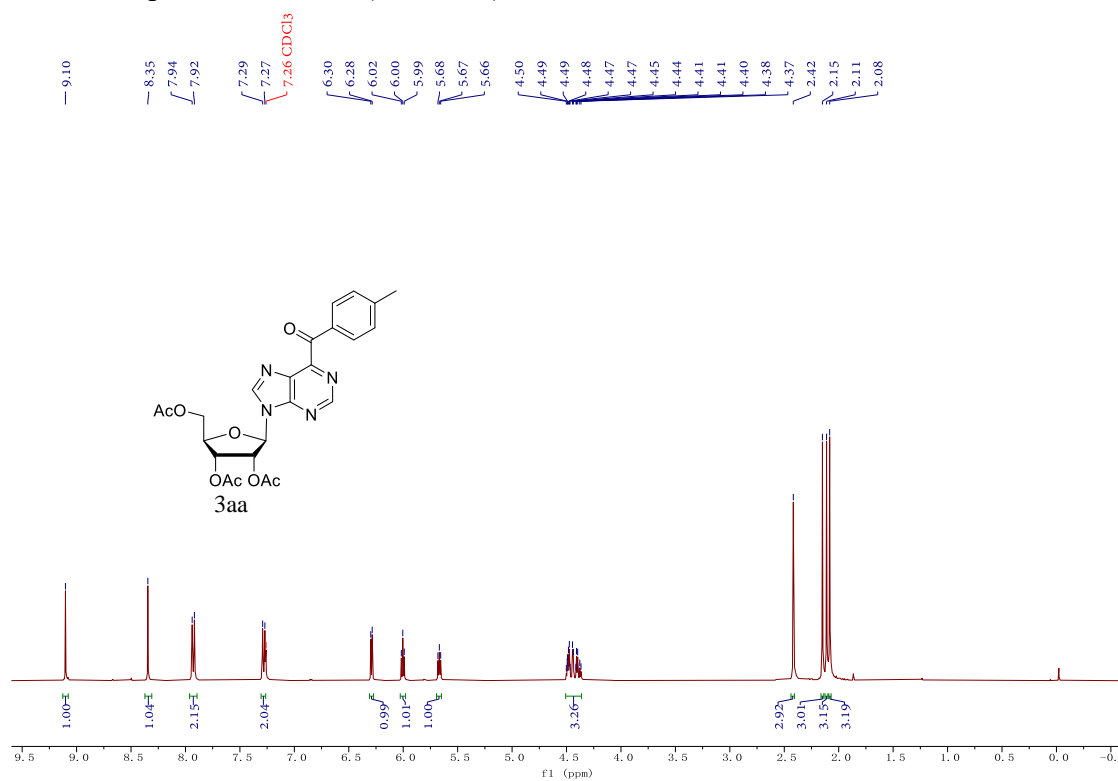

$^{13}\text{C-NMR}$  spectrum for **3aa** (in  $\text{CDCl}_3$ )

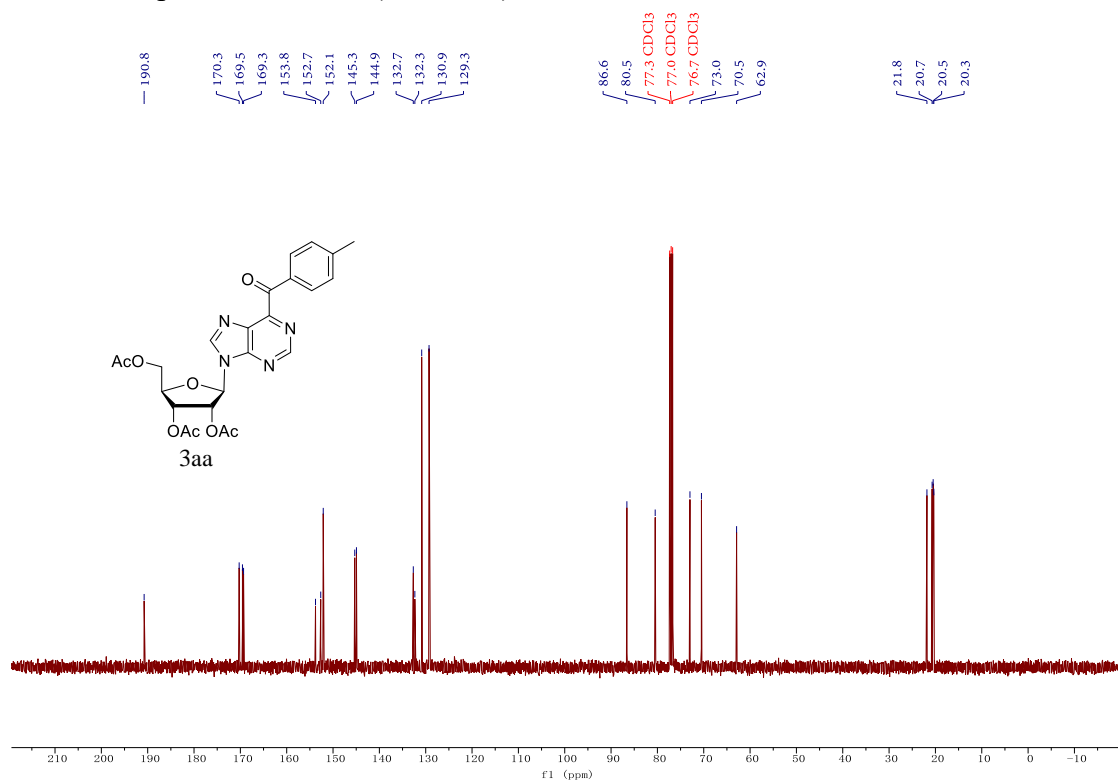

<sup>1</sup>H-NMR spectrum for **3ab** (in CDCl<sub>3</sub>)

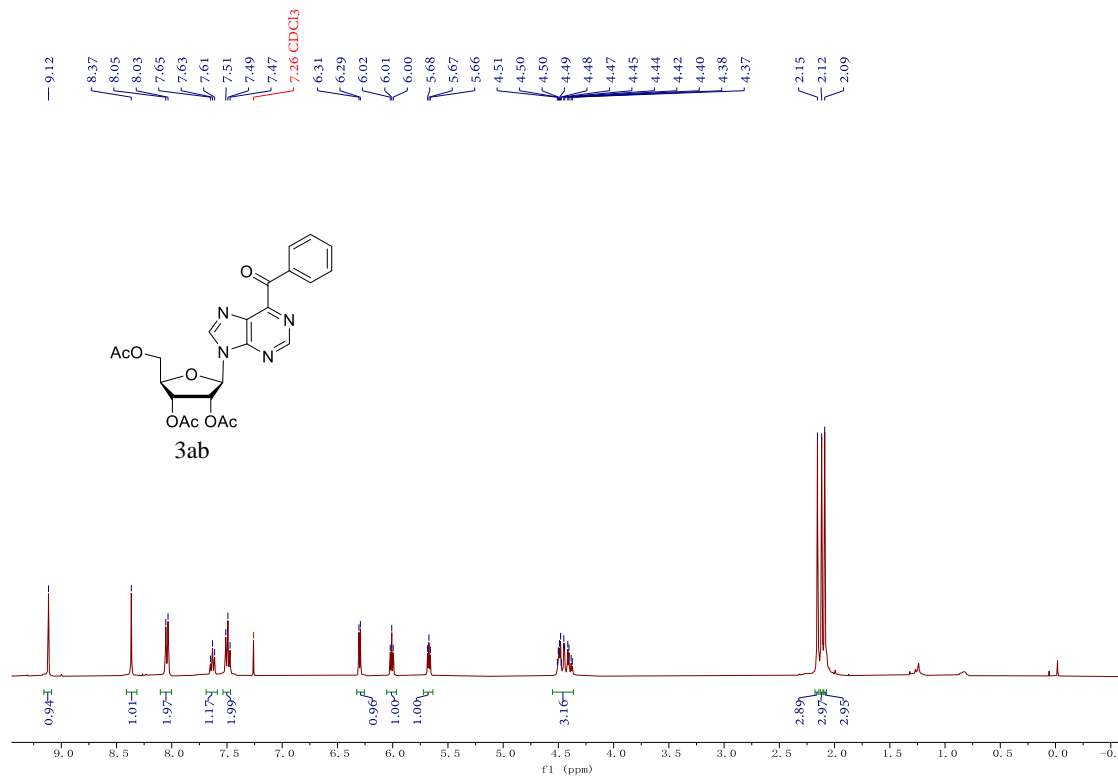

<sup>13</sup>C-NMR spectrum for **3ab** (in CDCl<sub>3</sub>)

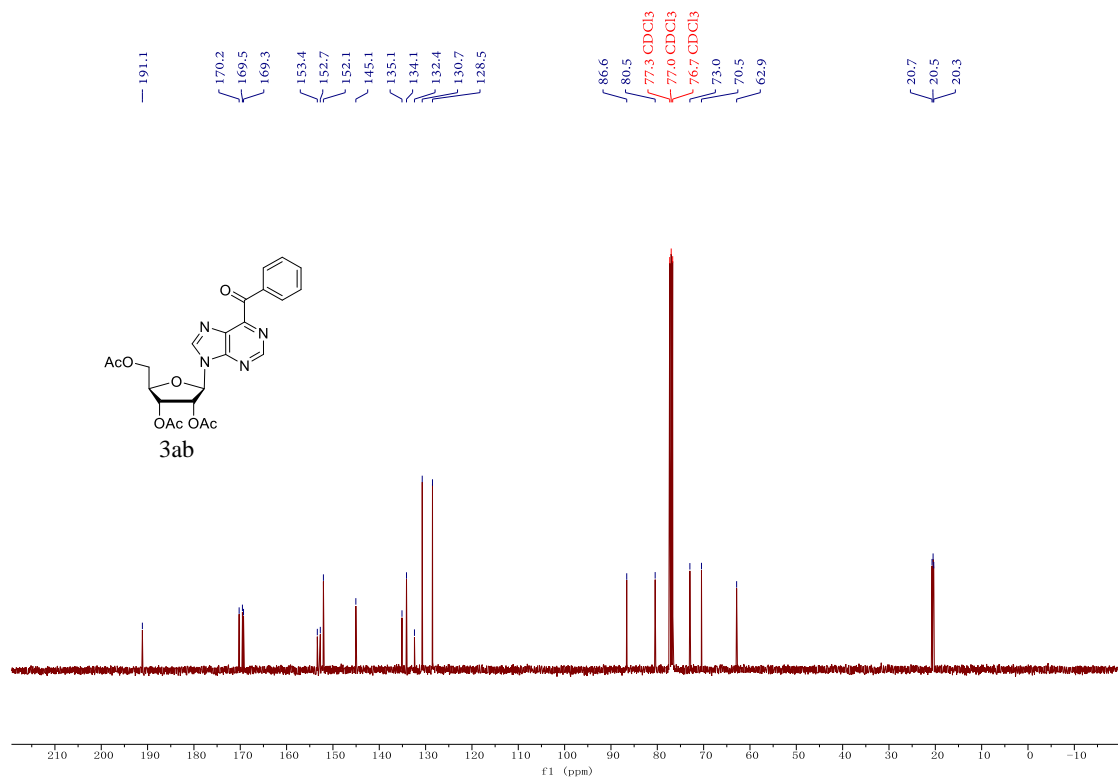



$^1\text{H-NMR}$  spectrum for **3ac** (in  $\text{CDCl}_3$ )

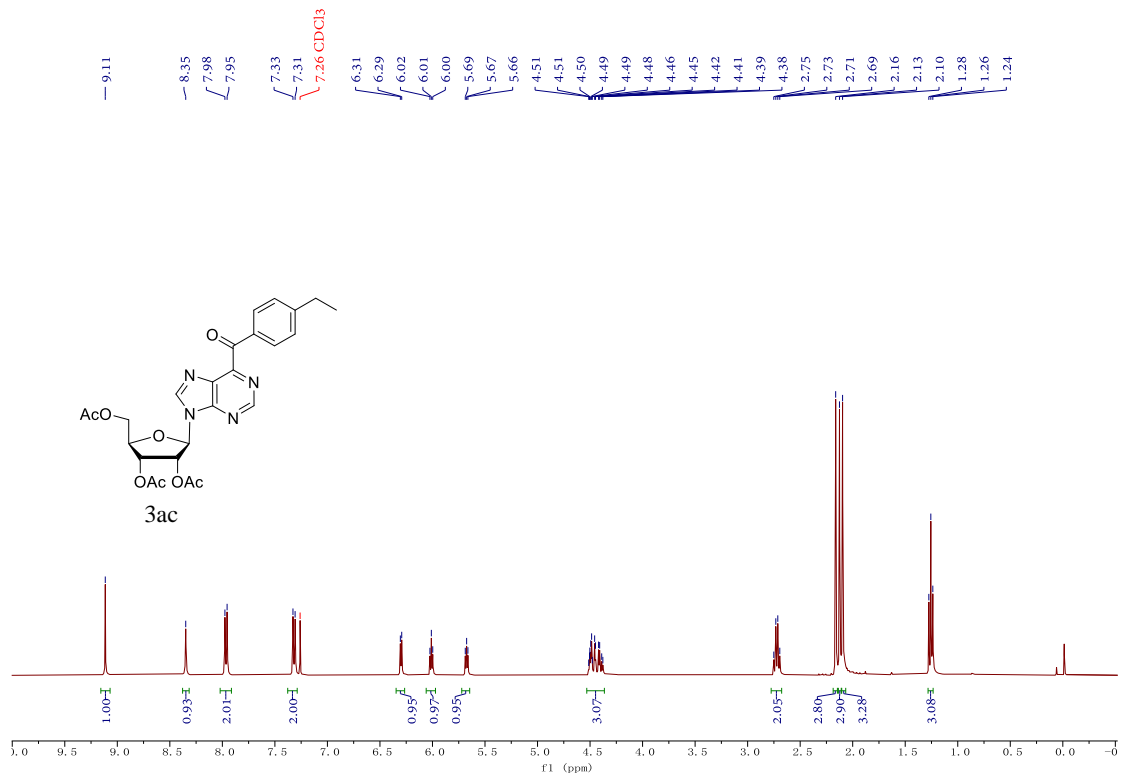

$^{13}\text{C-NMR}$  spectrum for **3ac** (in  $\text{CDCl}_3$ )

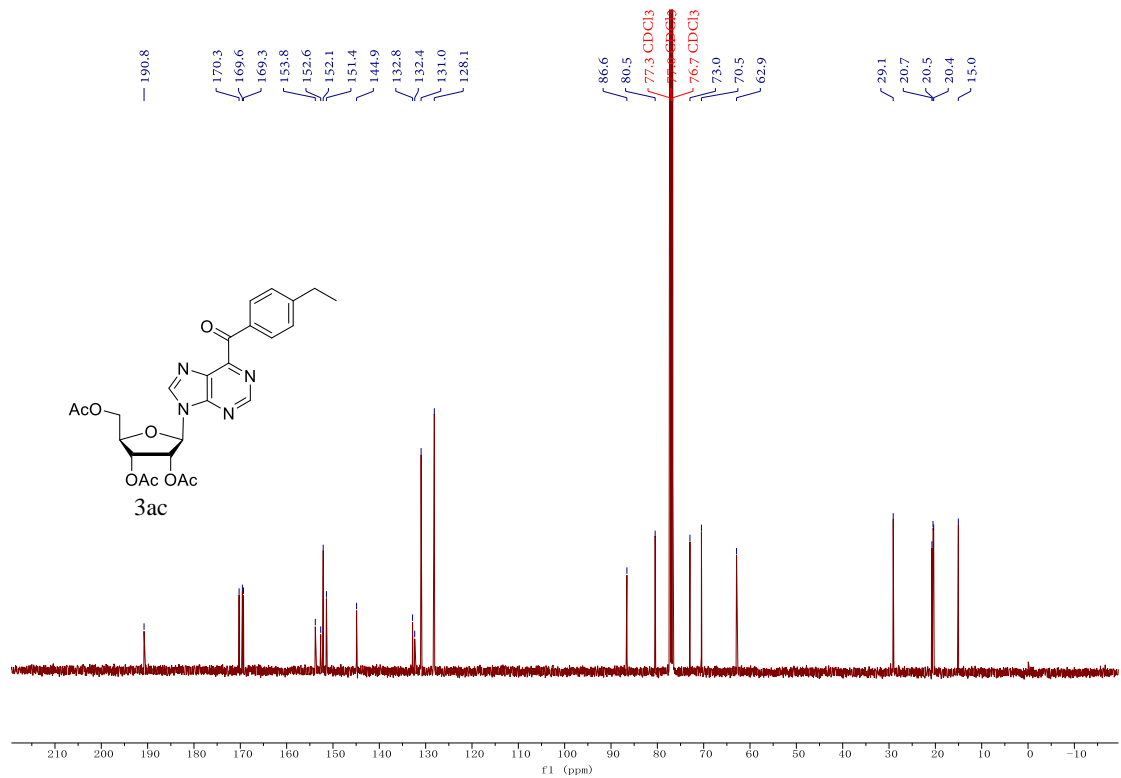

<sup>1</sup>H-NMR spectrum for **3ad** (in CDCl<sub>3</sub>)

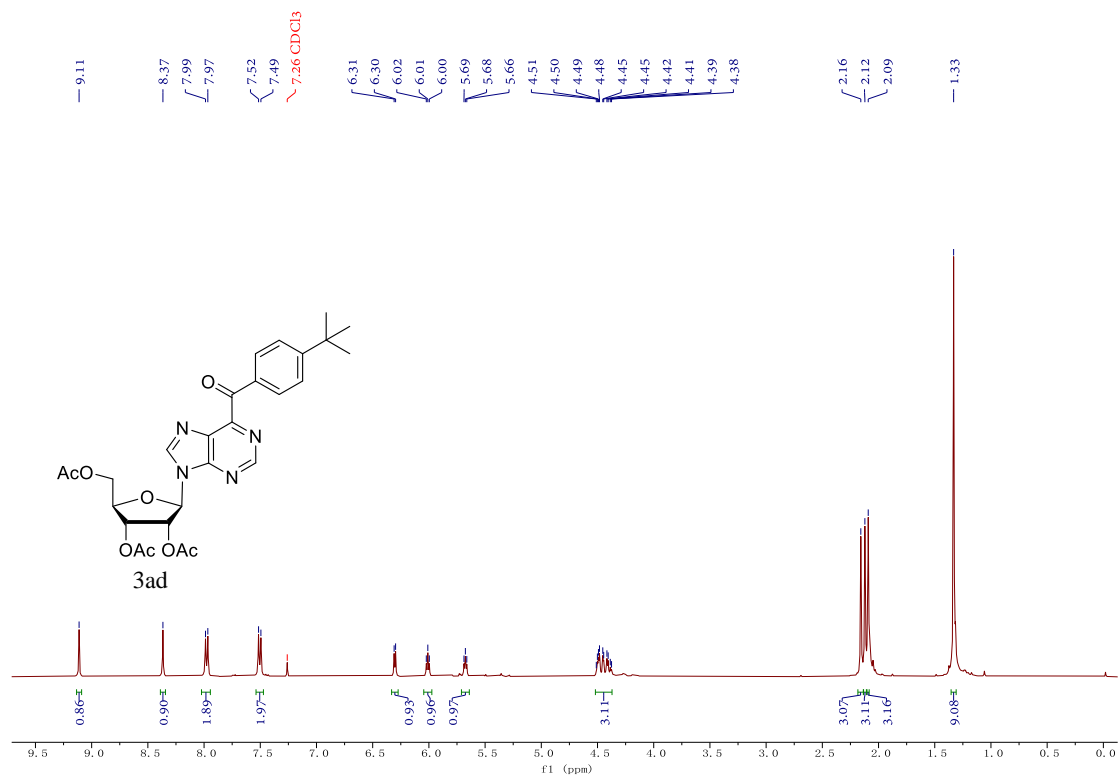

<sup>13</sup>C-NMR spectrum for **3ad** (in CDCl<sub>3</sub>)

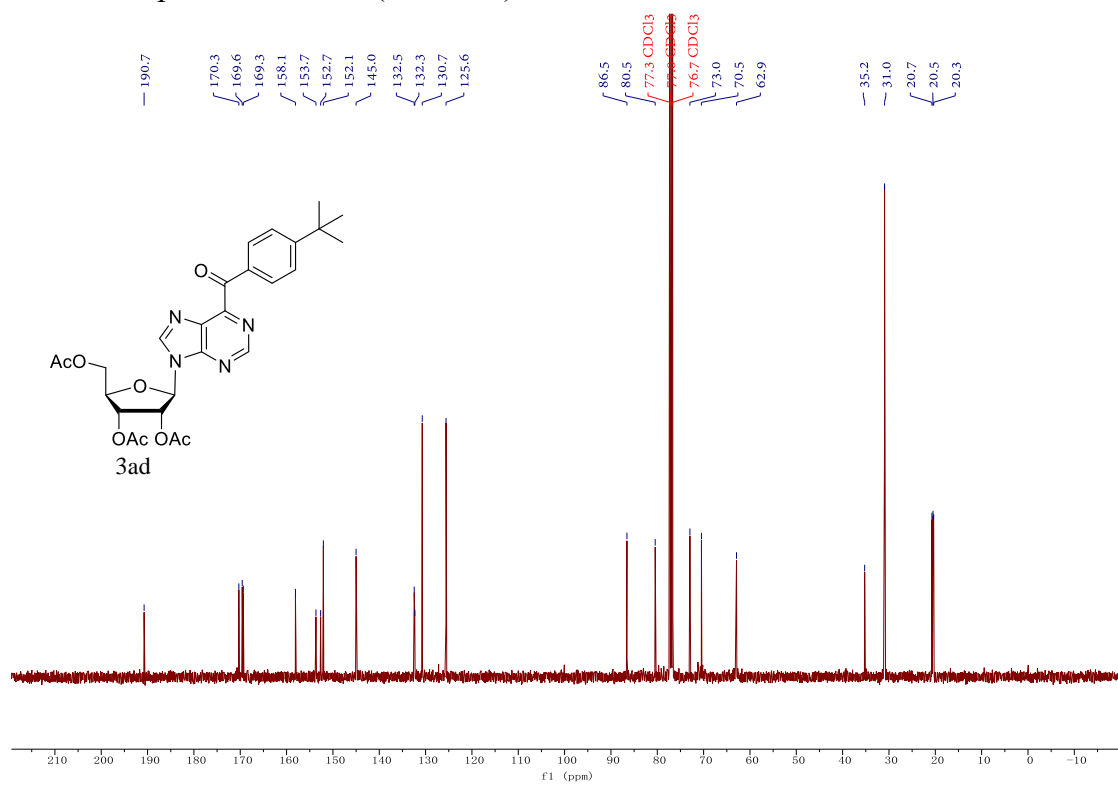

<sup>1</sup>H-NMR spectrum for **3ae** (in CDCl<sub>3</sub>)

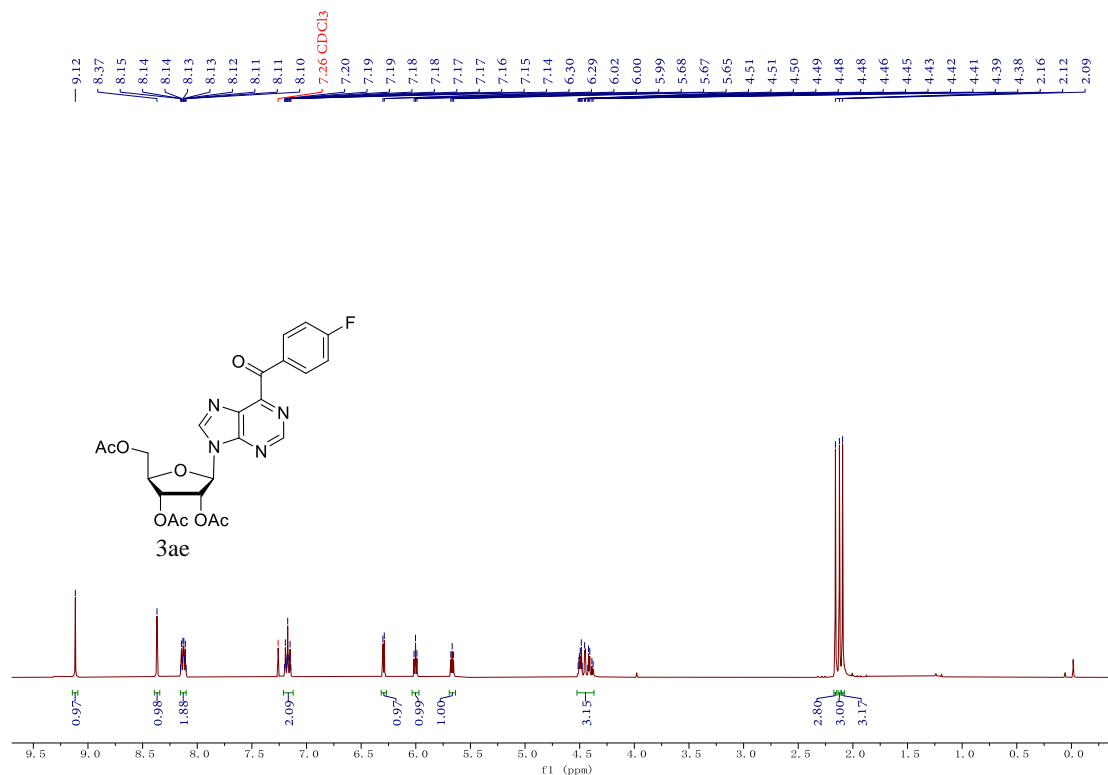

<sup>13</sup>C-NMR spectrum for **3ae** (in CDCl<sub>3</sub>)

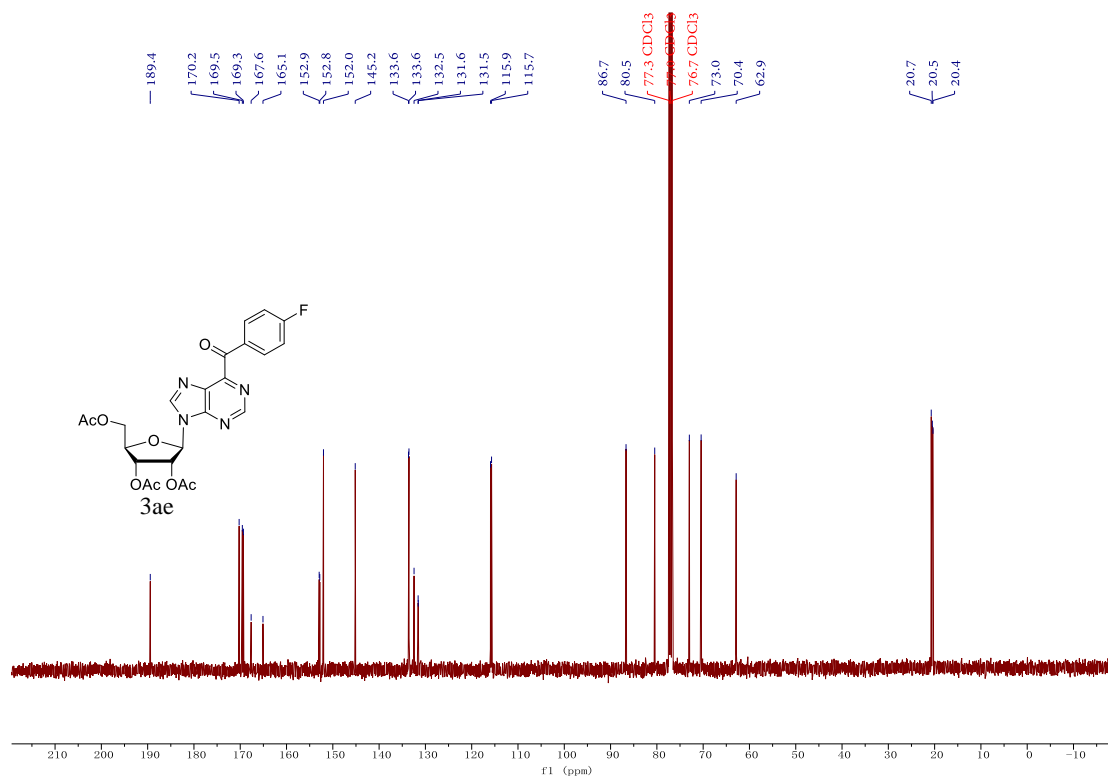

$^1\text{H-NMR}$  spectrum for **3af** (in  $\text{CDCl}_3$ )

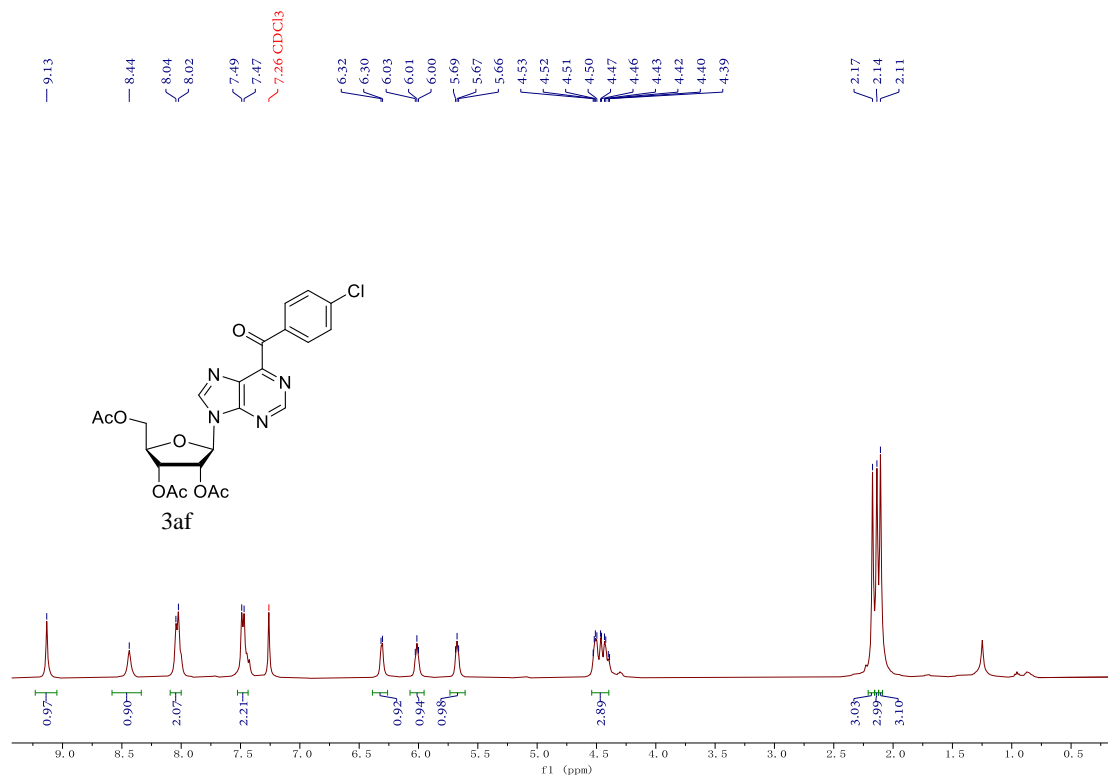

$^{13}\text{C-NMR}$  spectrum for **3af** (in  $\text{CDCl}_3$ )

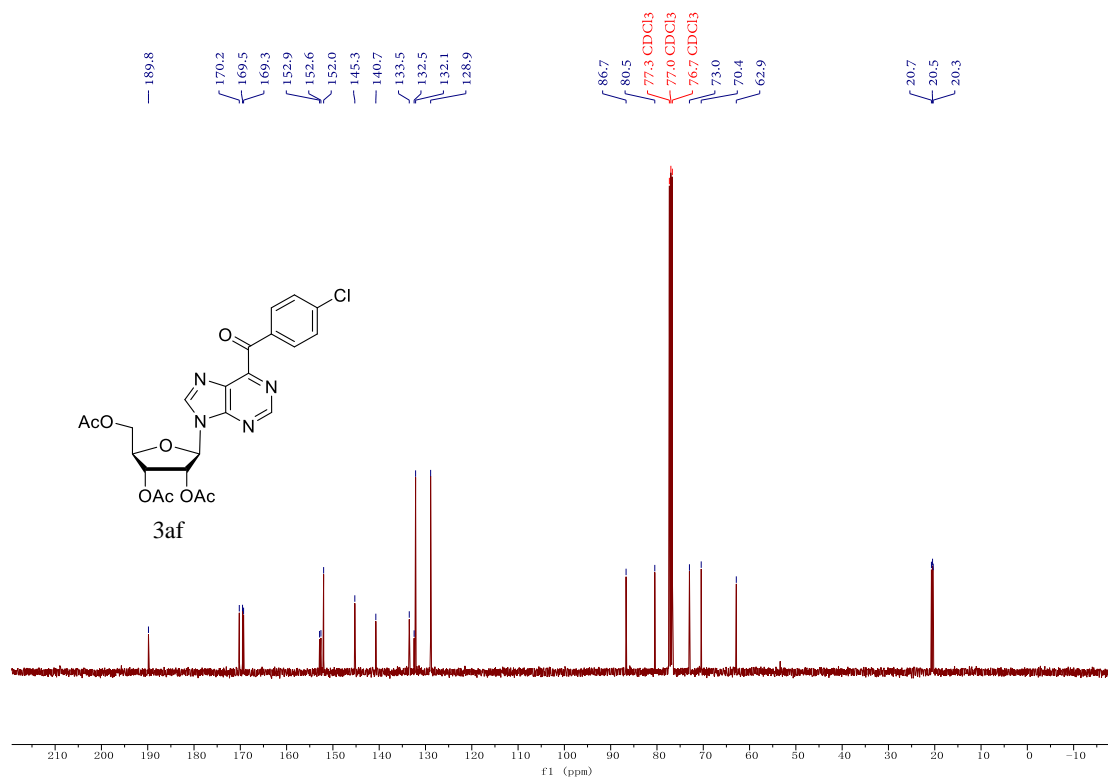

$^1\text{H-NMR}$  spectrum for **3ag** (in  $\text{CDCl}_3$ )

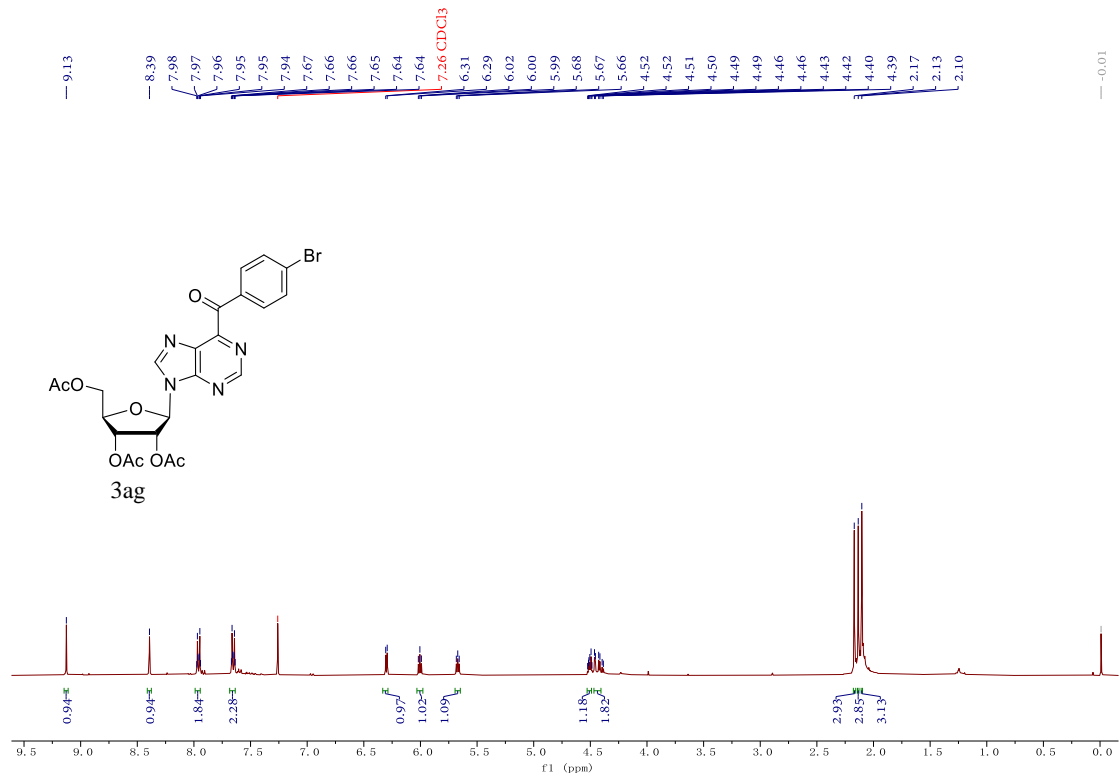

$^{13}\text{C-NMR}$  spectrum for **3ag** (in  $\text{CDCl}_3$ )

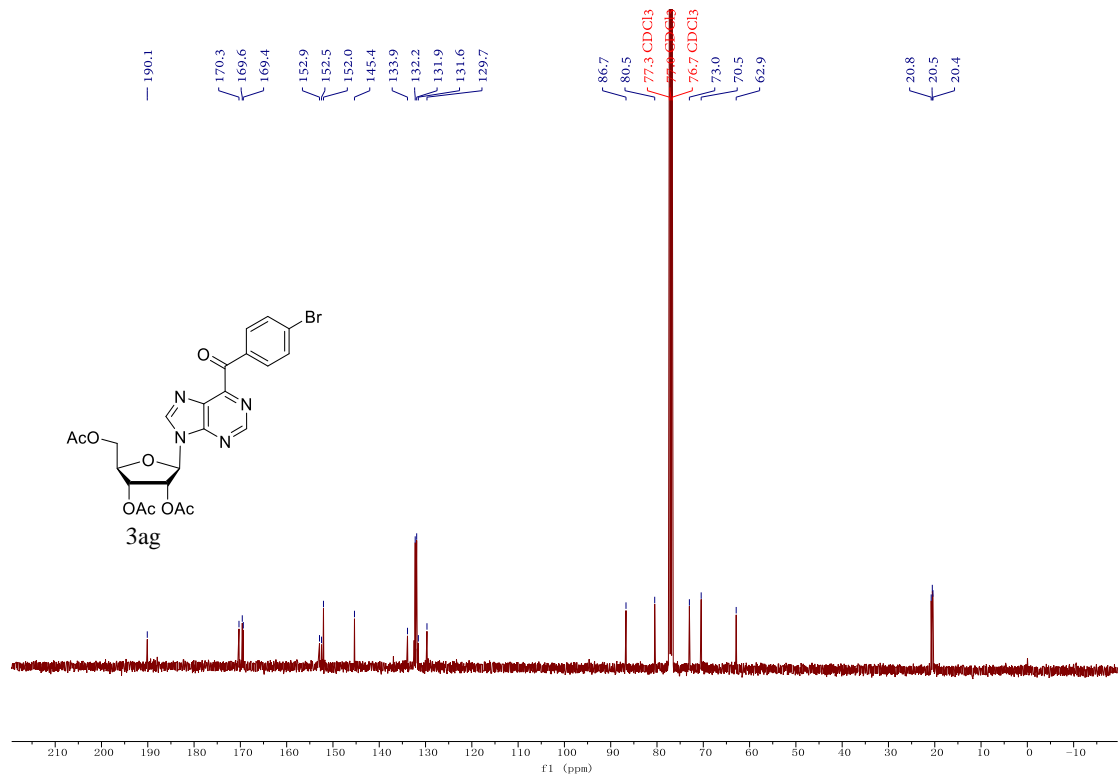

$^1\text{H-NMR}$  spectrum for **3ah** (in  $\text{CDCl}_3$ )

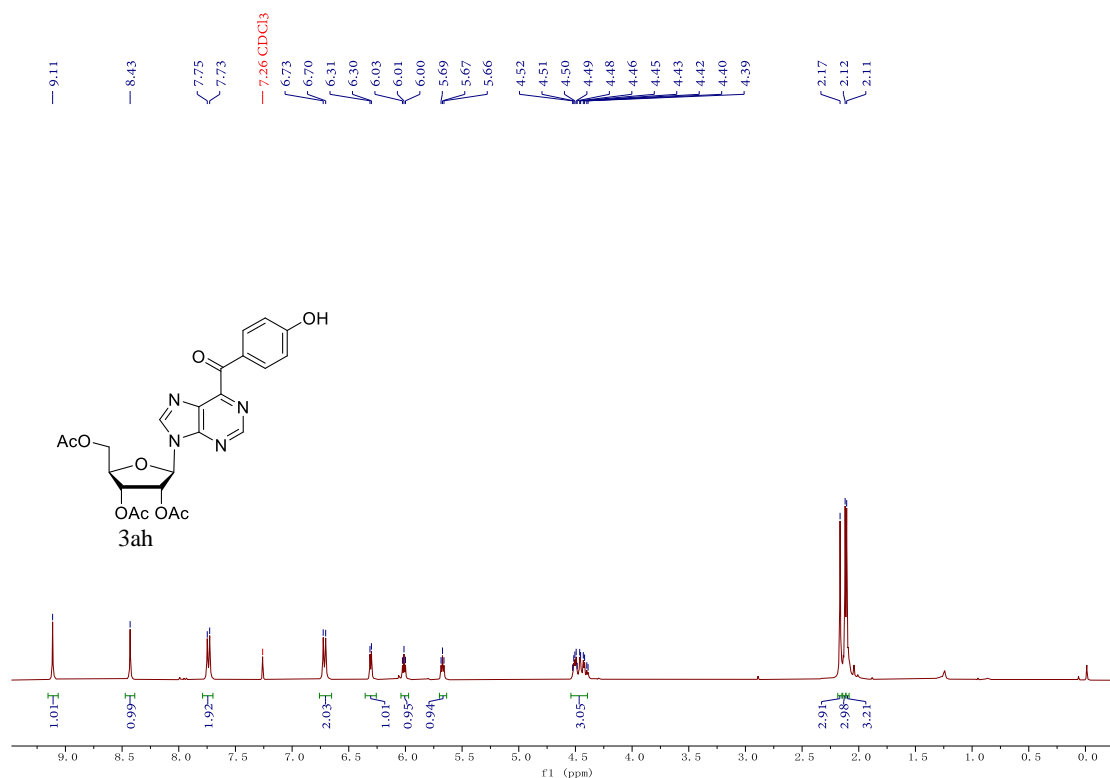

$^{13}\text{C-NMR}$  spectrum for **3ah** (in  $\text{CDCl}_3$ )

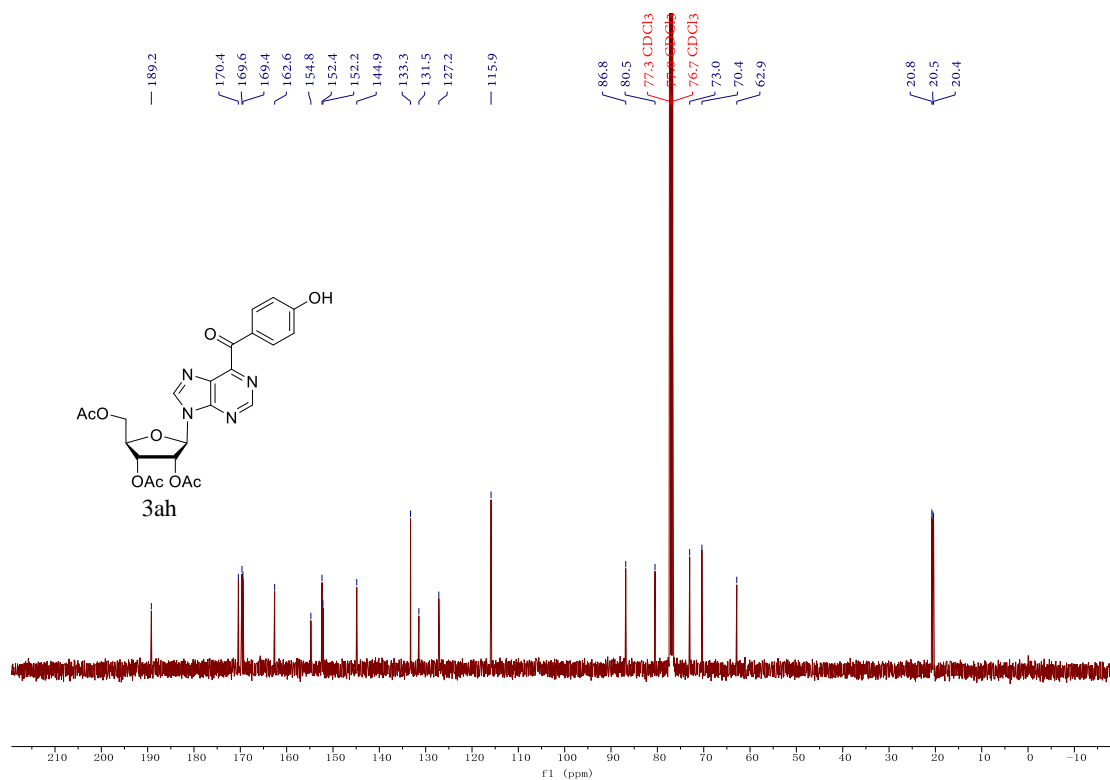

<sup>1</sup>H-NMR spectrum for **3ai** (in CDCl<sub>3</sub>)

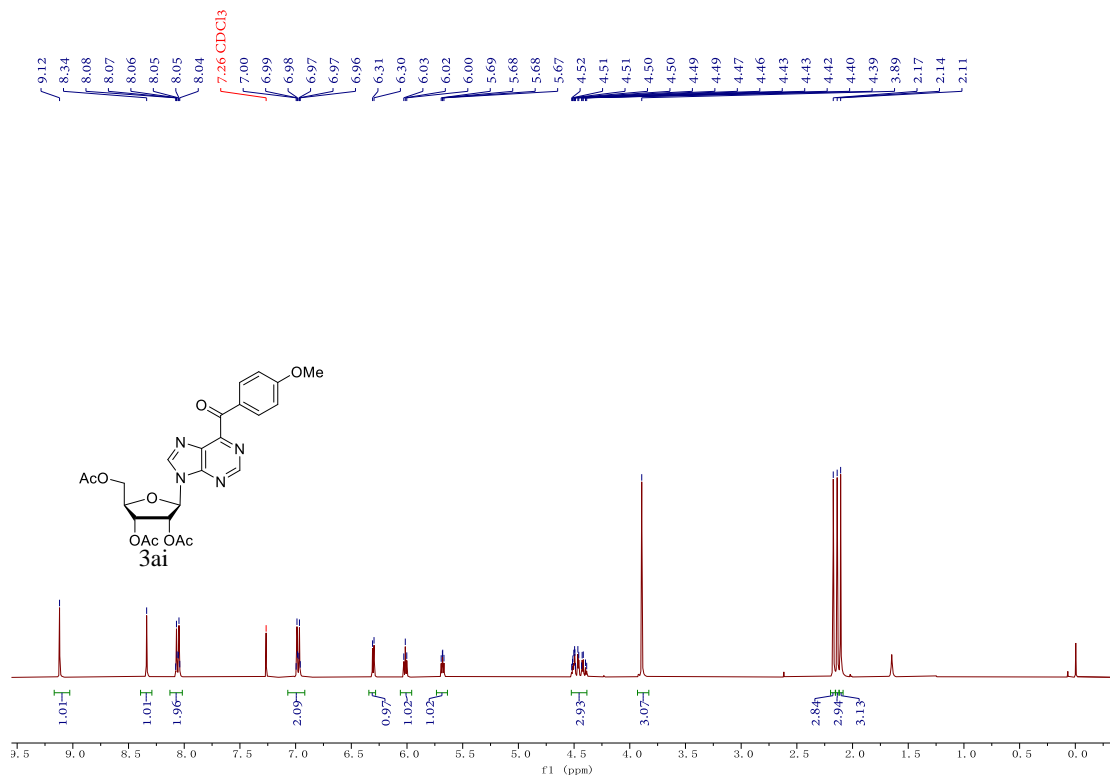

<sup>13</sup>C-NMR spectrum for **3ai** (in CDCl<sub>3</sub>)

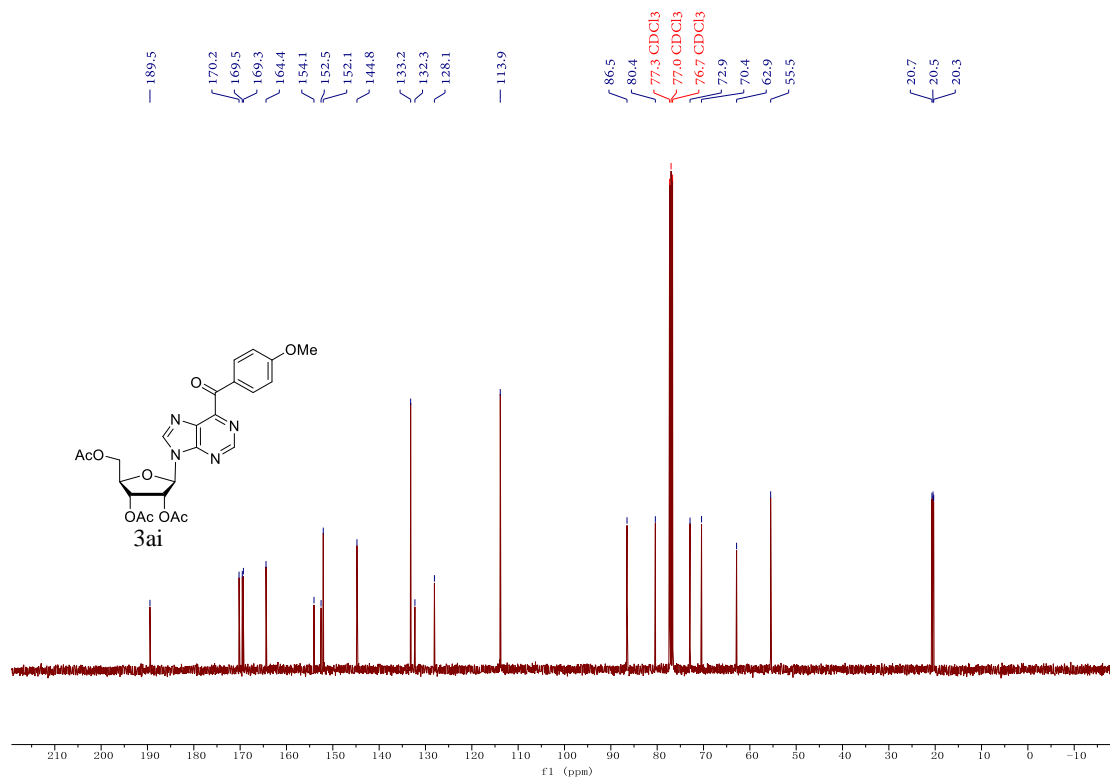

<sup>1</sup>H-NMR spectrum for **3aj** (in CDCl<sub>3</sub>)

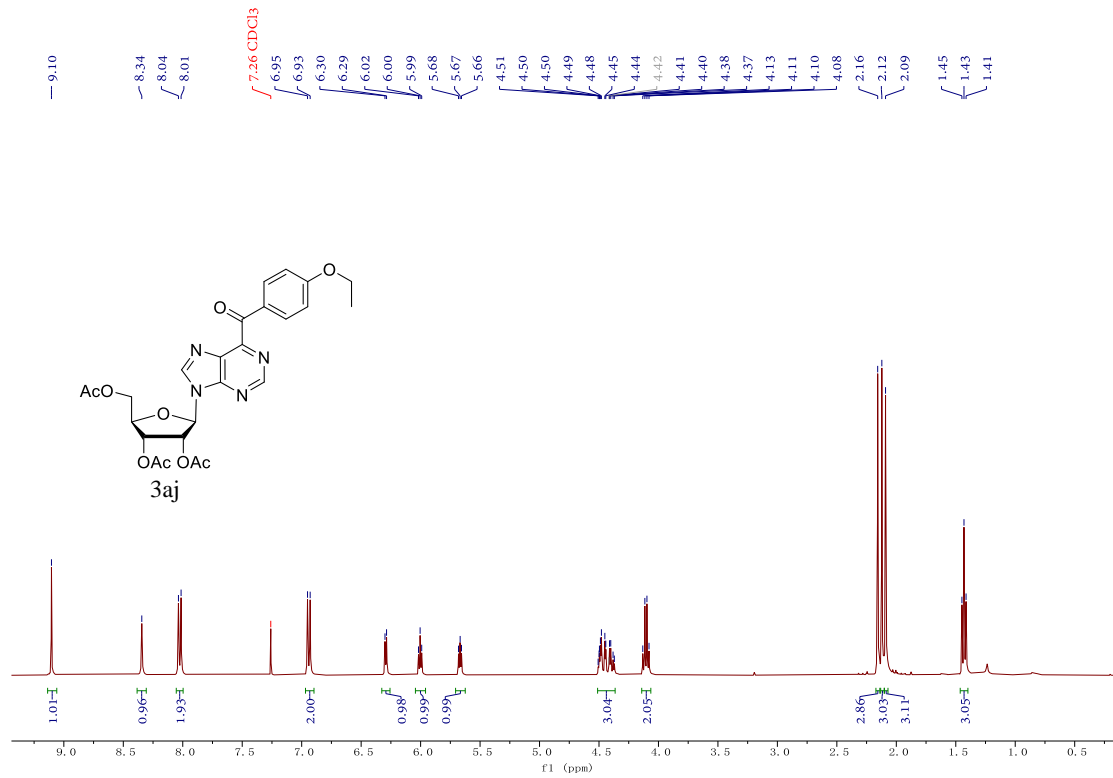

<sup>13</sup>C-NMR spectrum for **3aj** (in CDCl<sub>3</sub>)

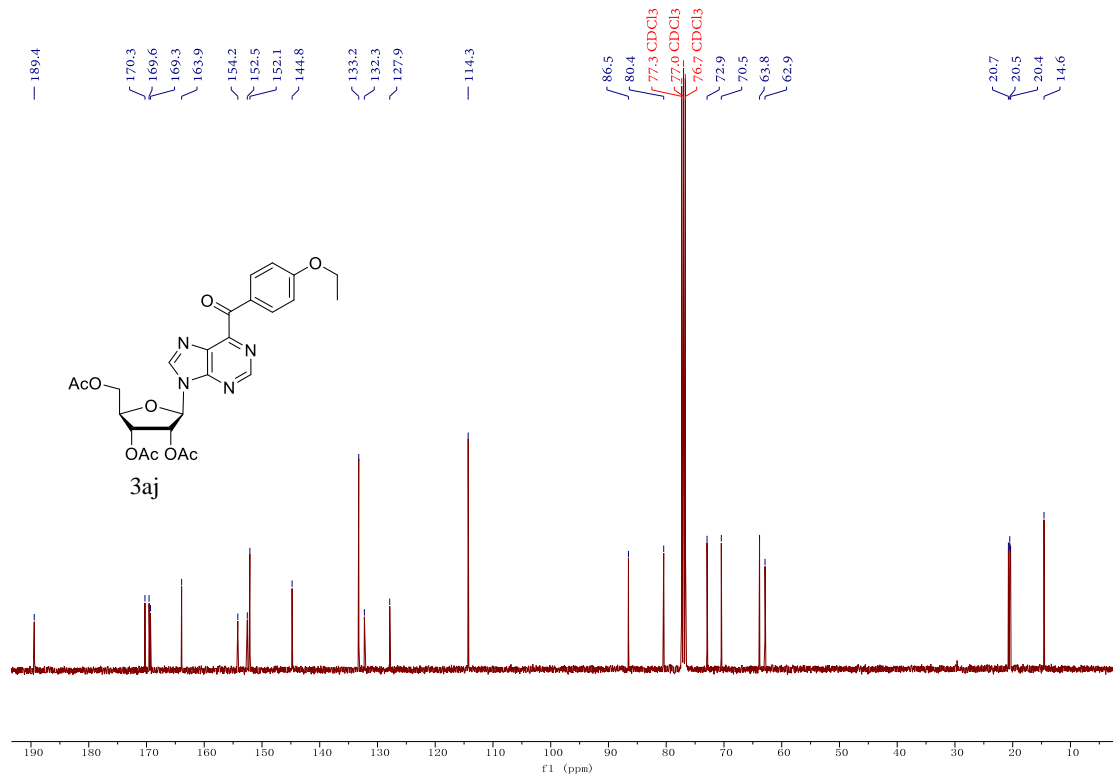



$^1\text{H-NMR}$  spectrum for **3ak** (in  $\text{CDCl}_3$ )

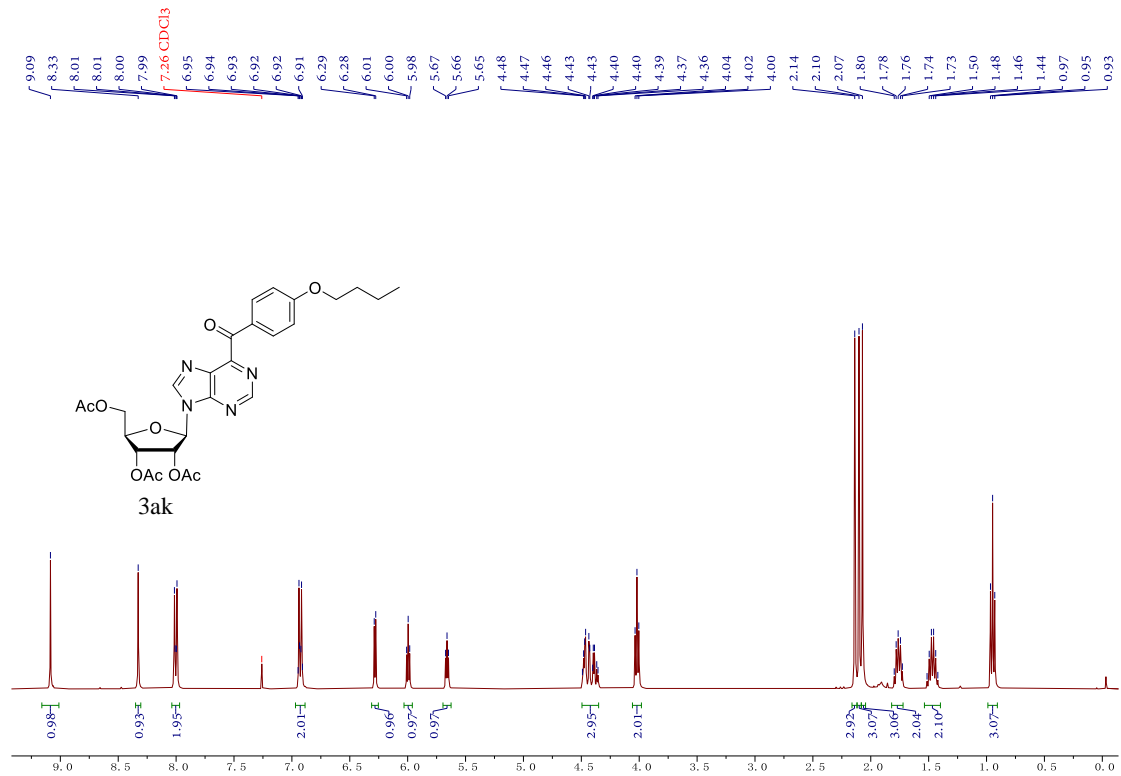

$^{13}\text{C-NMR}$  spectrum for **3ak** (in  $\text{CDCl}_3$ )

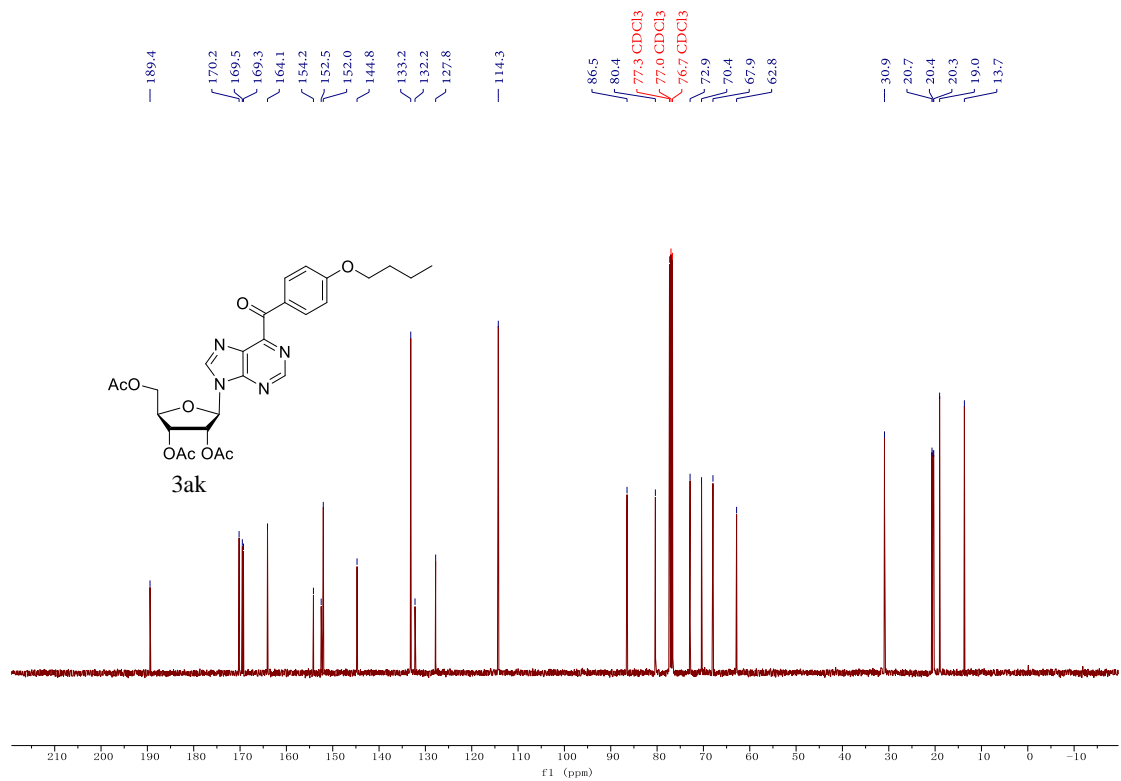

### <sup>1</sup>H-NMR spectrum for **3al** (in CDCl<sub>3</sub>)

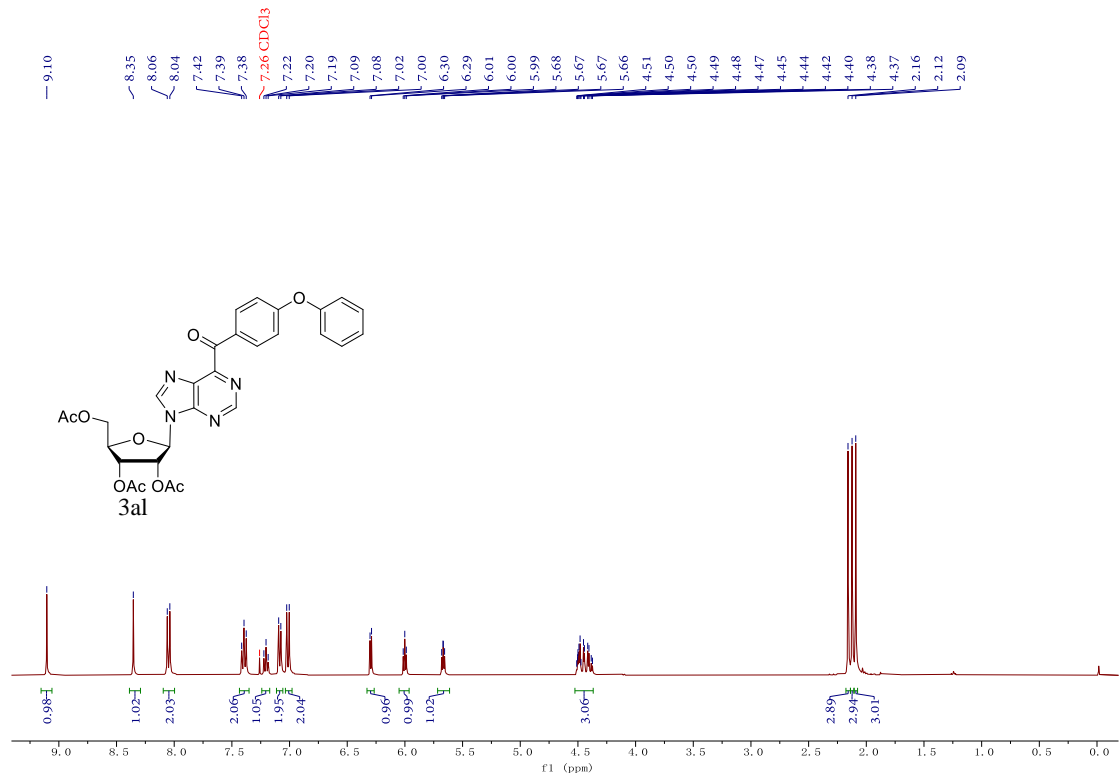

### <sup>13</sup>C-NMR spectrum for **3al** (in CDCl<sub>3</sub>)

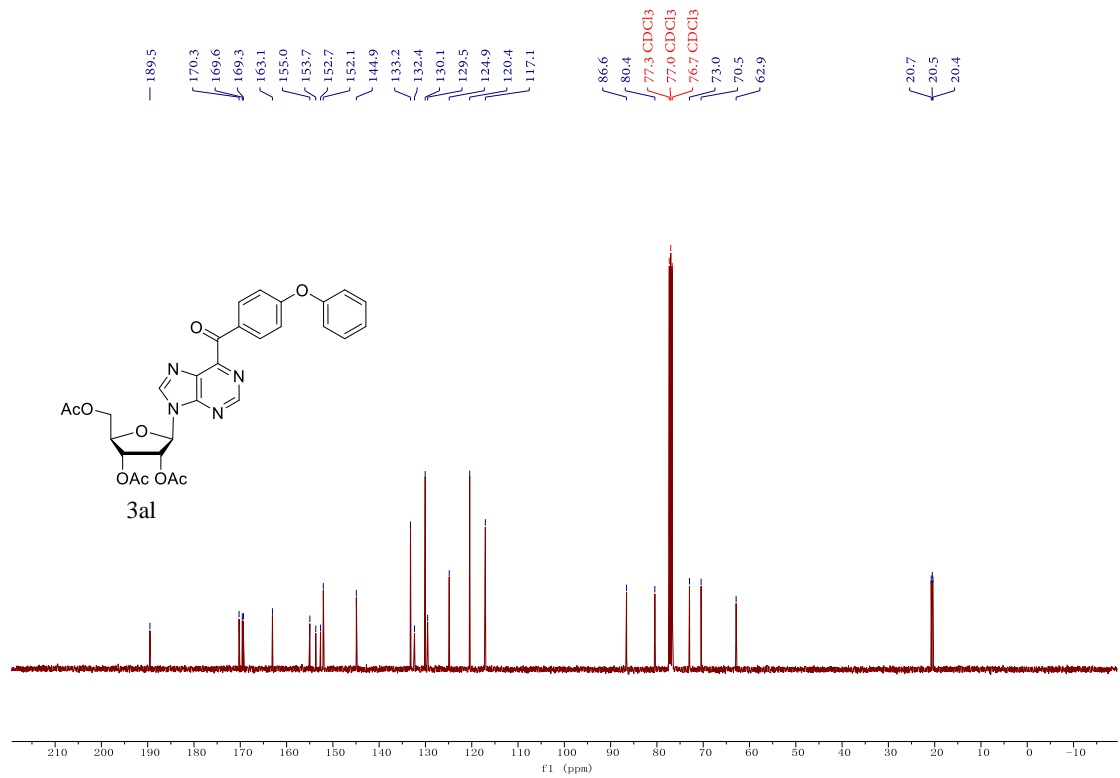

<sup>1</sup>H-NMR spectrum for **3am** (in CDCl<sub>3</sub>)

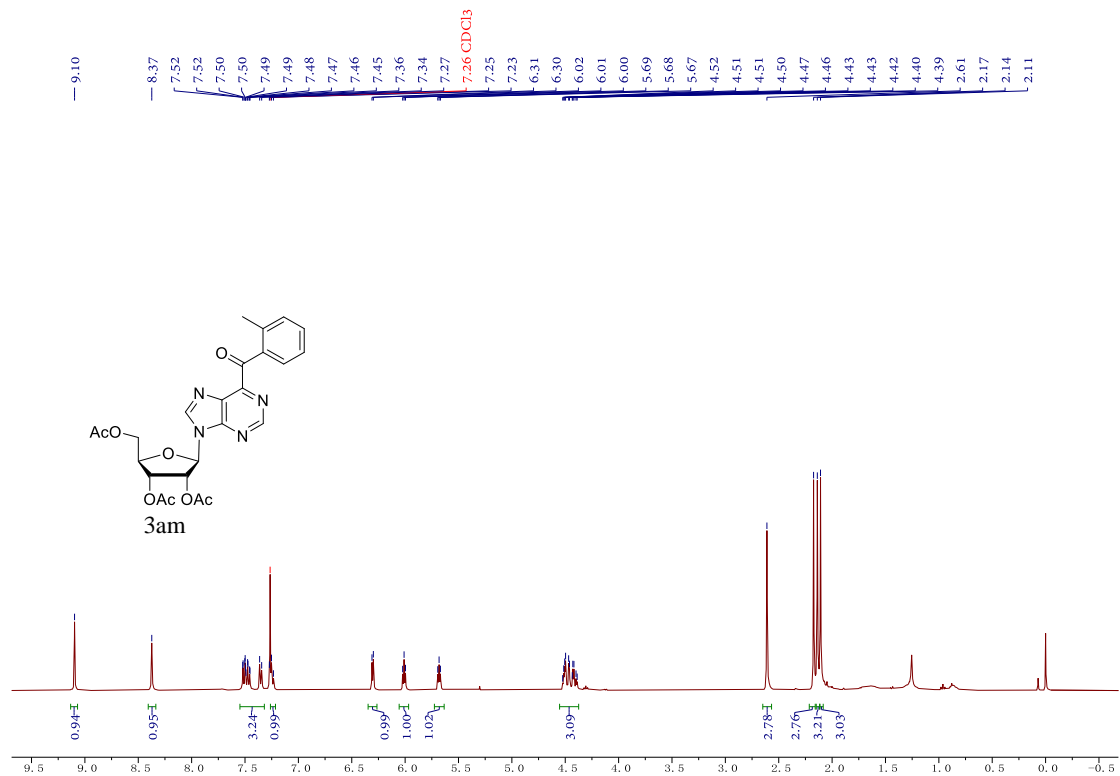

<sup>13</sup>C-NMR spectrum for **3am** (in CDCl<sub>3</sub>)

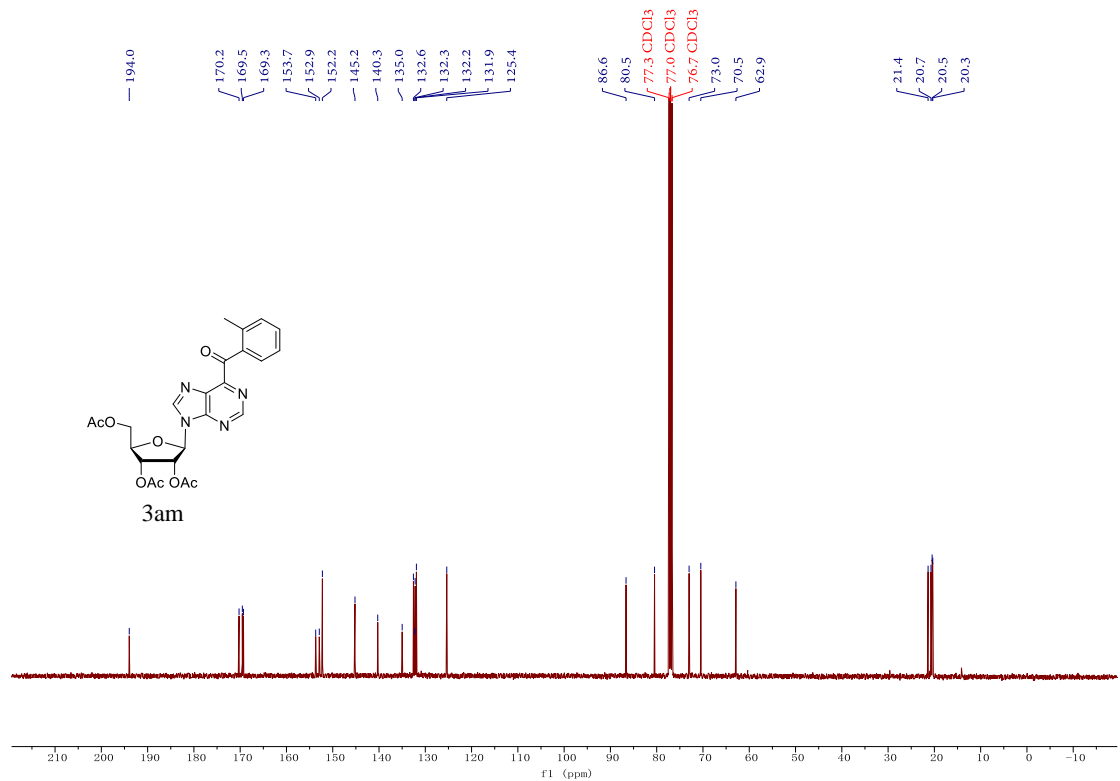

$^1\text{H-NMR}$  spectrum for **3an** (in  $\text{CDCl}_3$ )

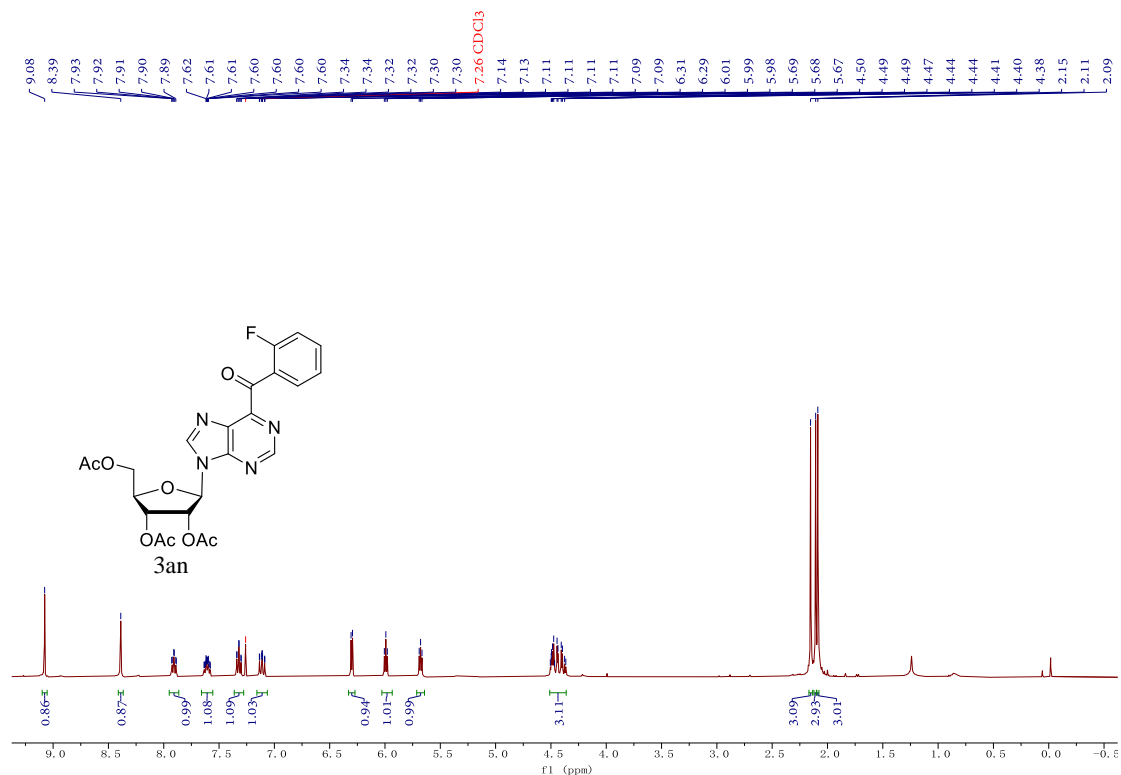

$^{13}\text{C-NMR}$  spectrum for **3an** (in  $\text{CDCl}_3$ )

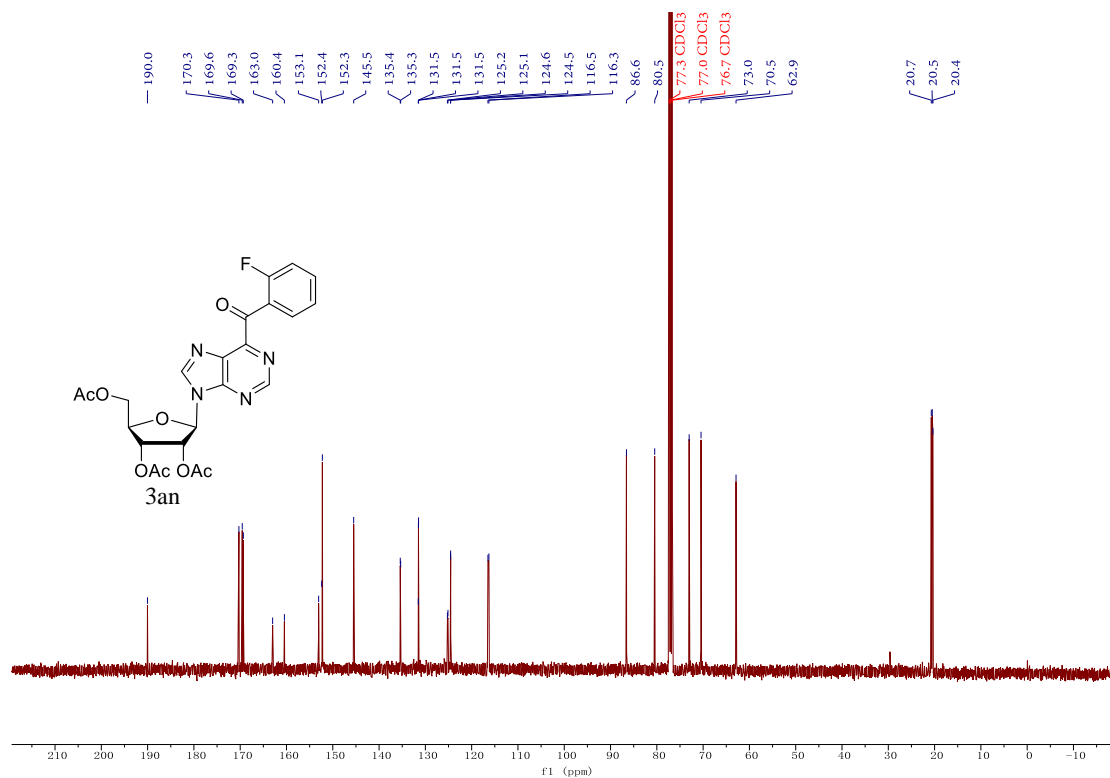

### $^1\text{H-NMR}$ spectrum for **3ao** (in $\text{CDCl}_3$ )

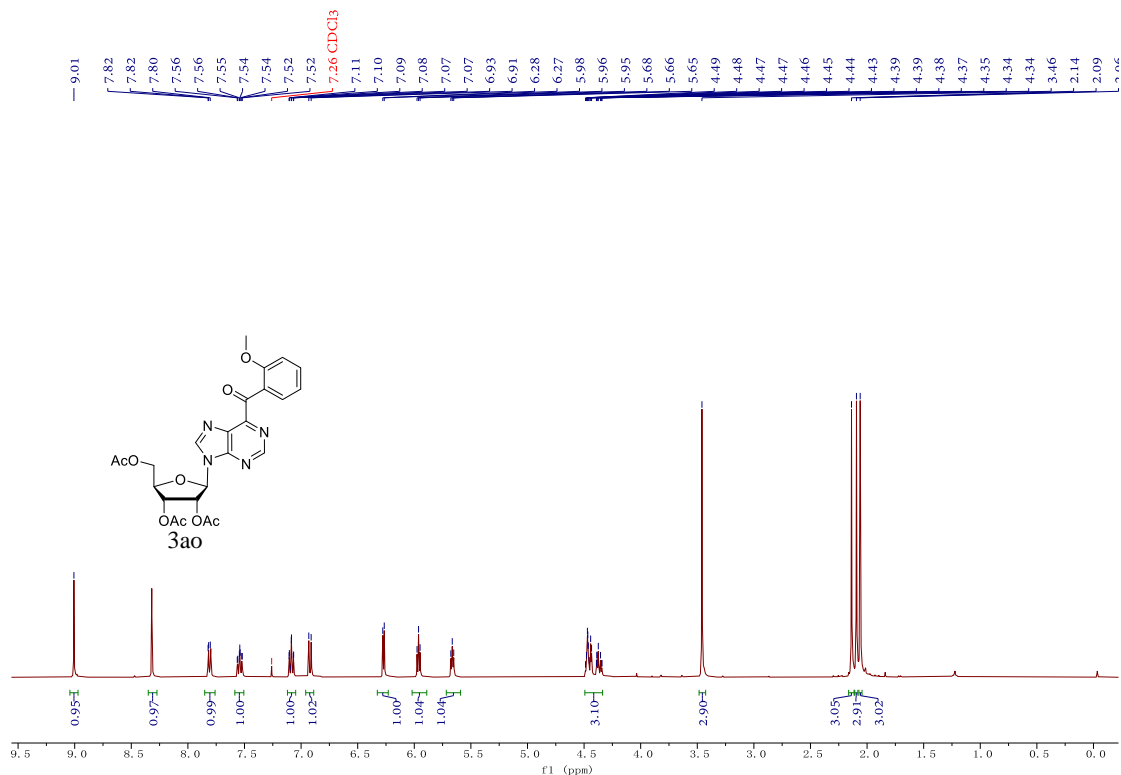

### $^{13}\text{C-NMR}$ spectrum for **3ao** (in $\text{CDCl}_3$ )

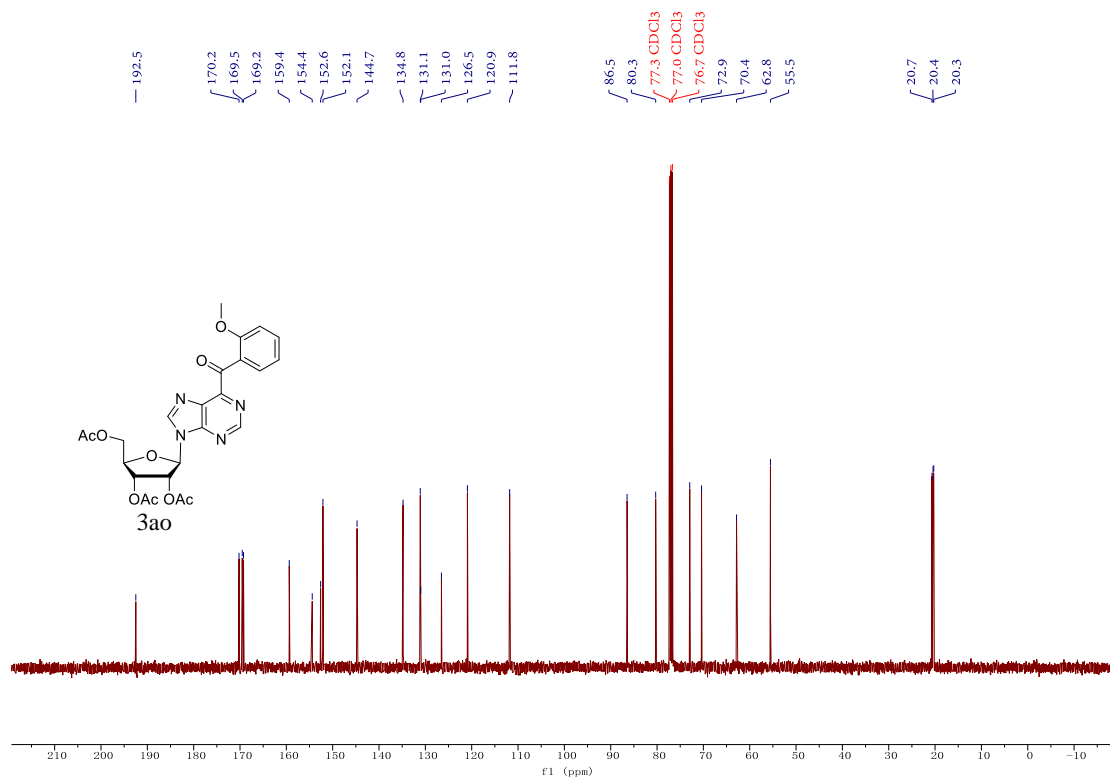

$^1\text{H-NMR}$  spectrum for **3ap** (in  $\text{CDCl}_3$ )

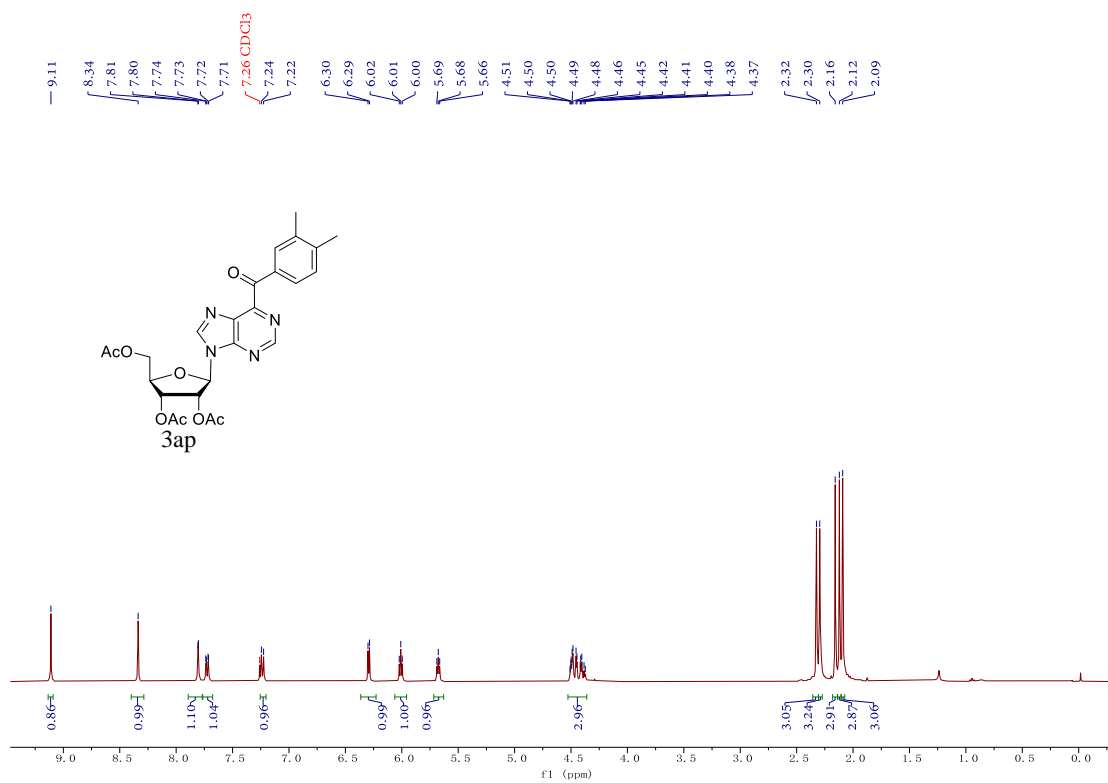

$^{13}\text{C-NMR}$  spectrum for **3ap** (in  $\text{CDCl}_3$ )

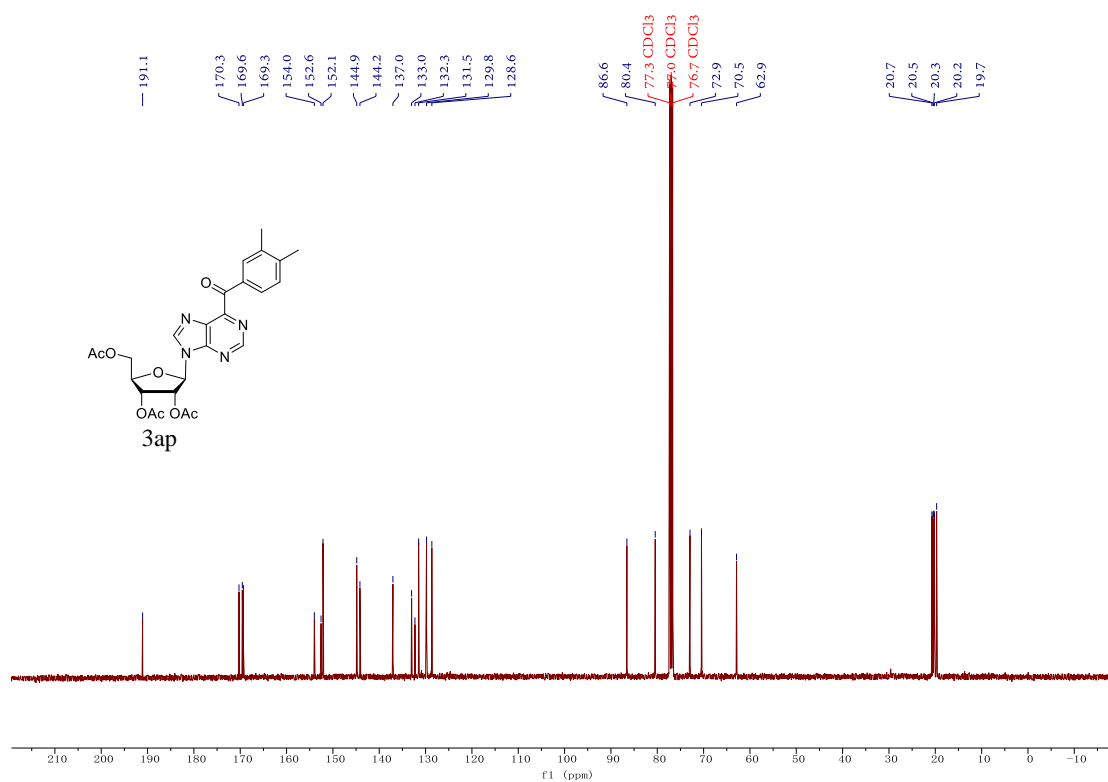

$^1\text{H-NMR}$  spectrum for **3aq** (in  $\text{CDCl}_3$ )

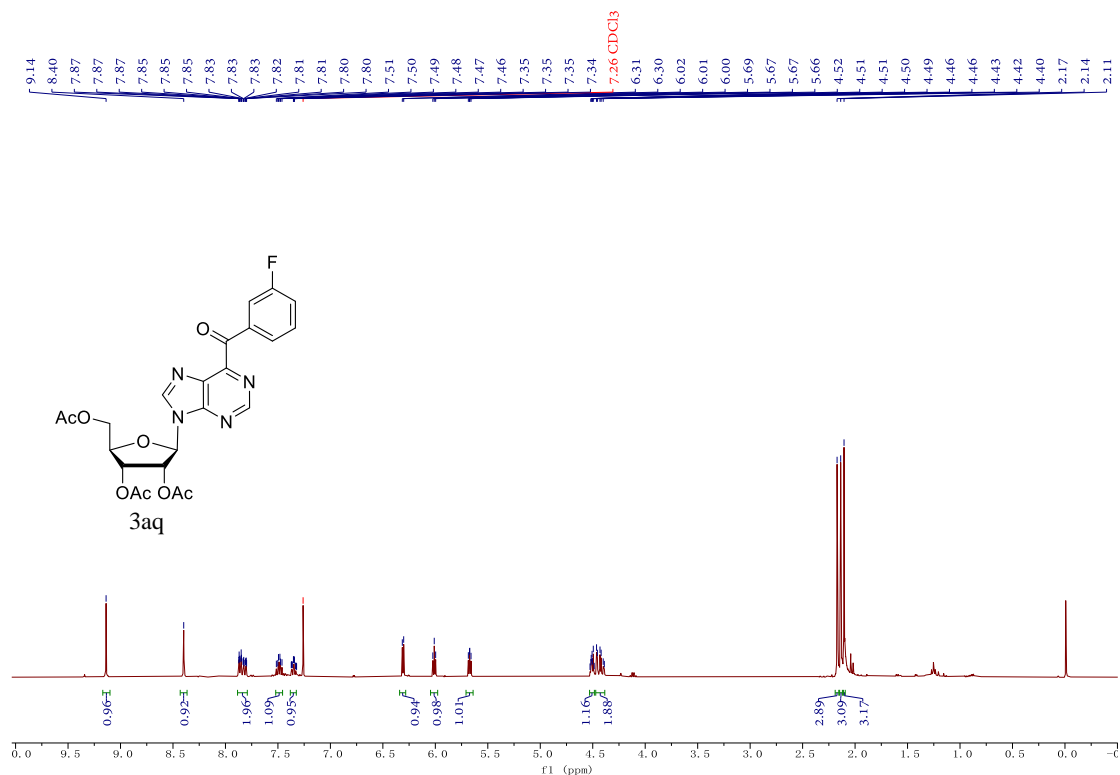

$^{13}\text{C-NMR}$  spectrum for **3aq** (in  $\text{CDCl}_3$ )

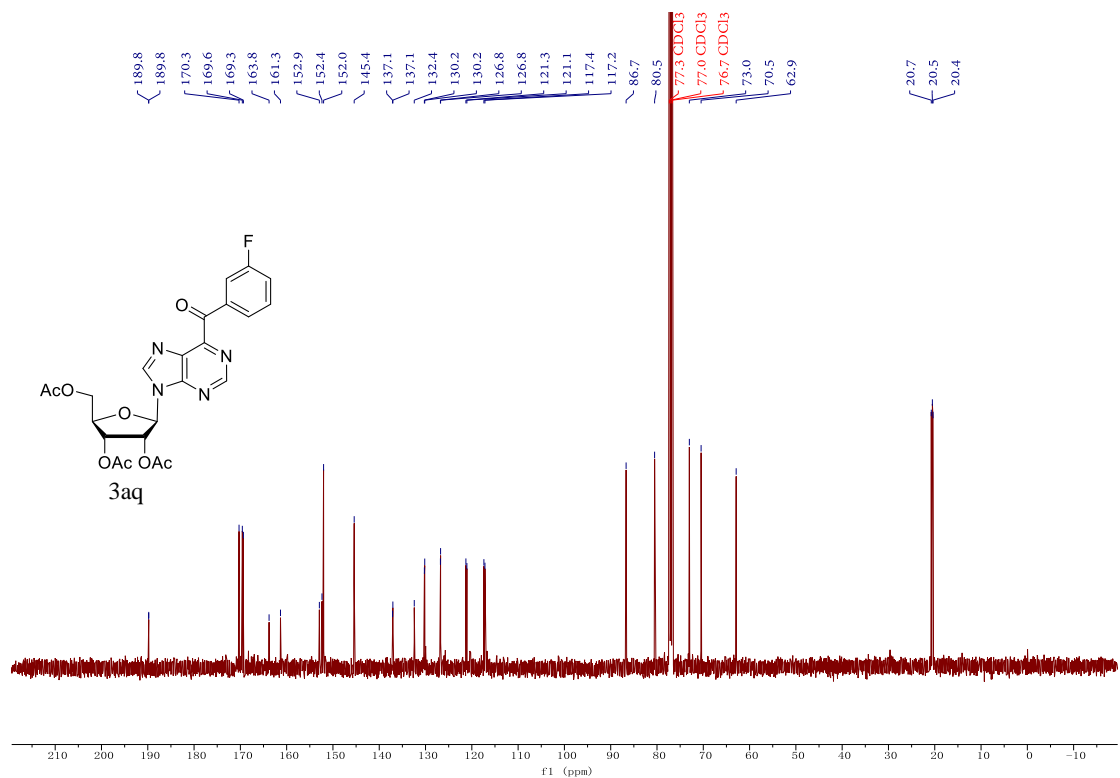

### $^1\text{H-NMR}$ spectrum for **3ar** (in $\text{CDCl}_3$ )

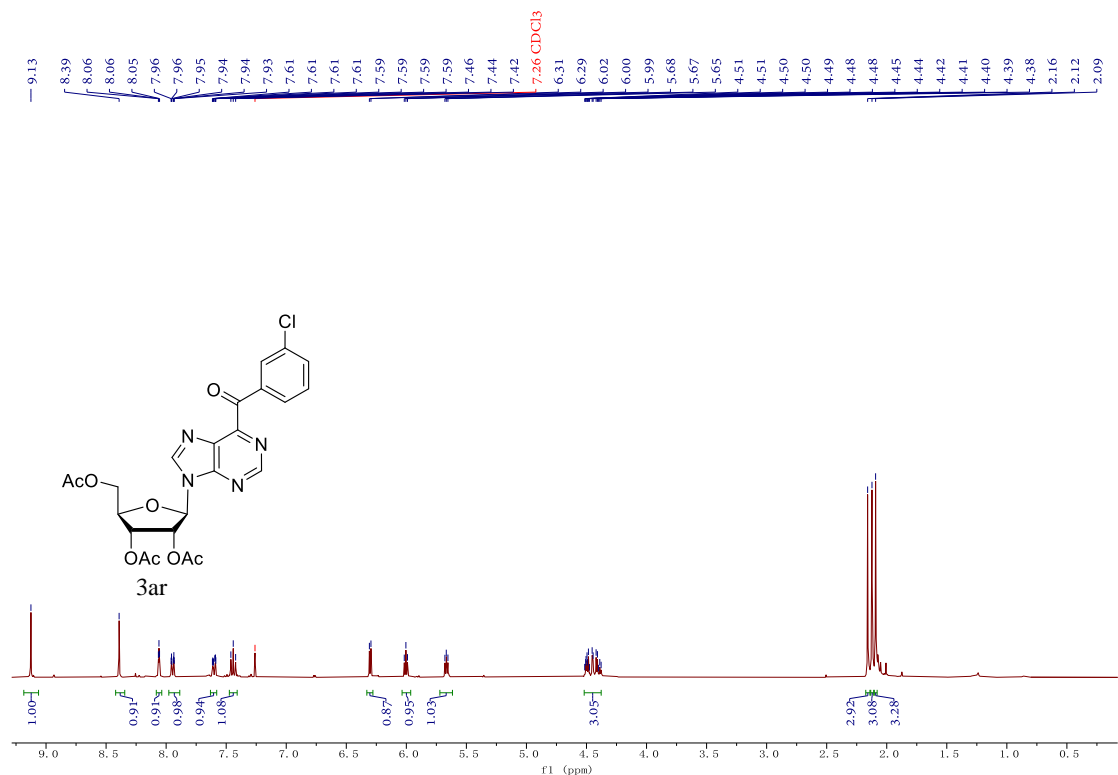

### $^{13}\text{C-NMR}$ spectrum for **3ar** (in $\text{CDCl}_3$ )

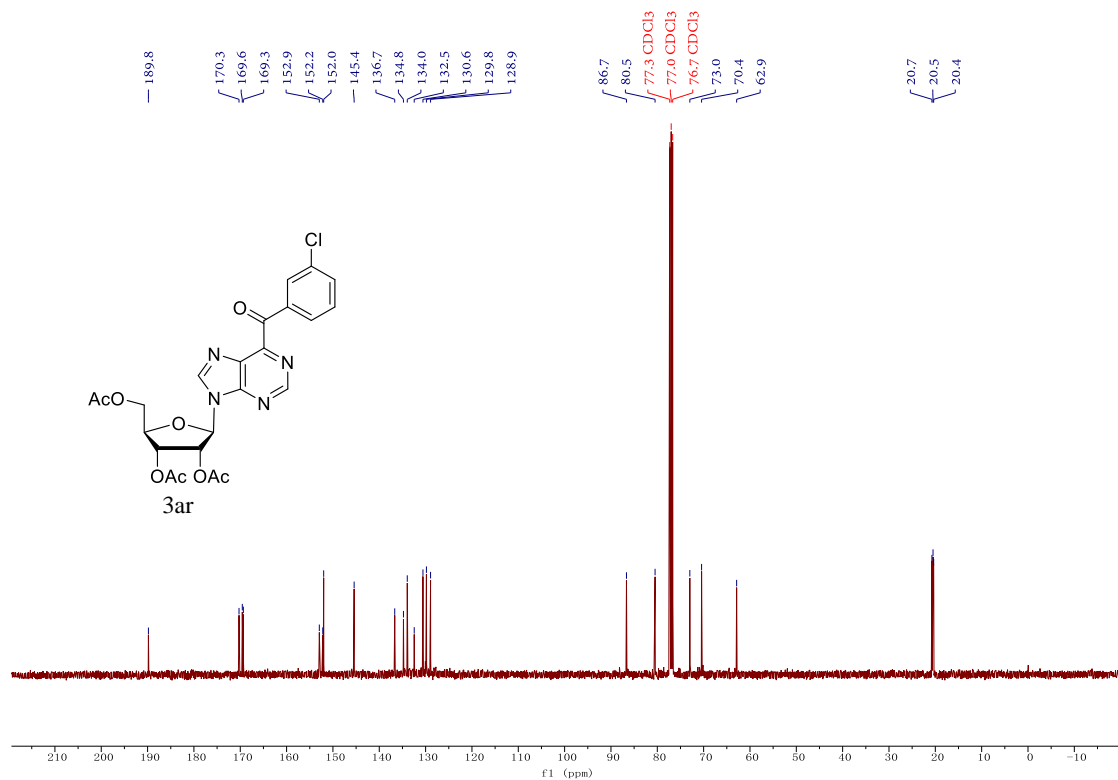



### <sup>1</sup>H-NMR spectrum for **3as** (in CDCl<sub>3</sub>)

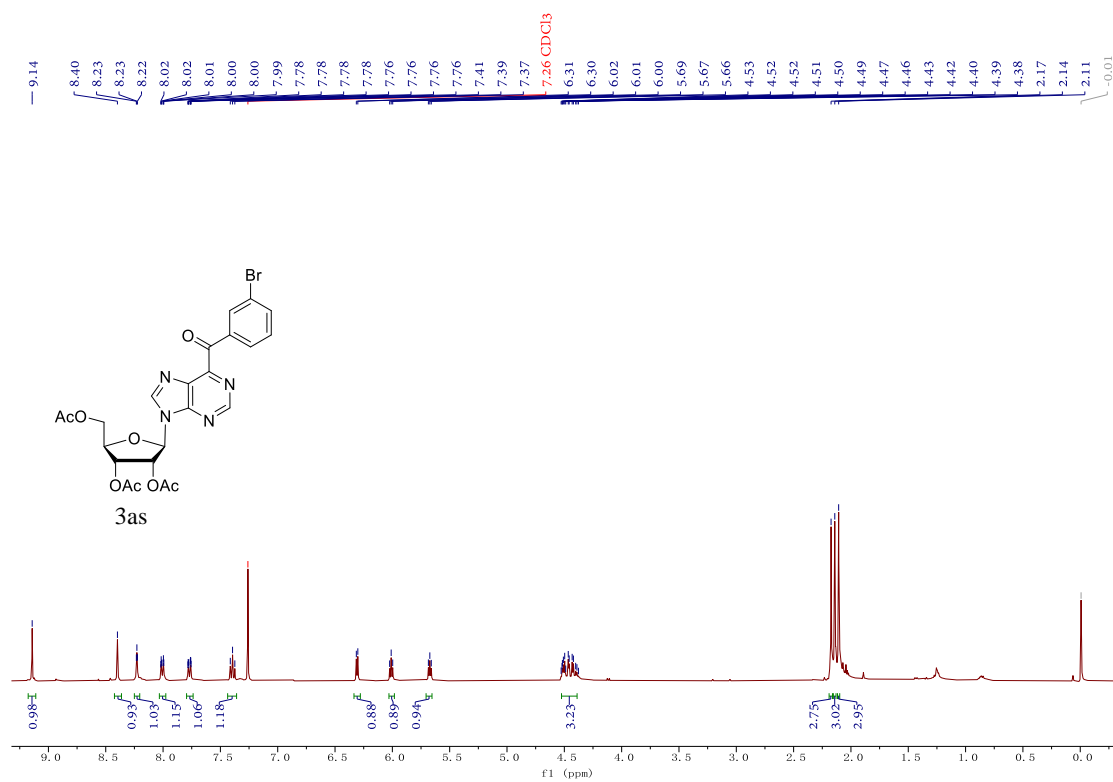

### <sup>13</sup>C-NMR spectrum for **3as** (in CDCl<sub>3</sub>)

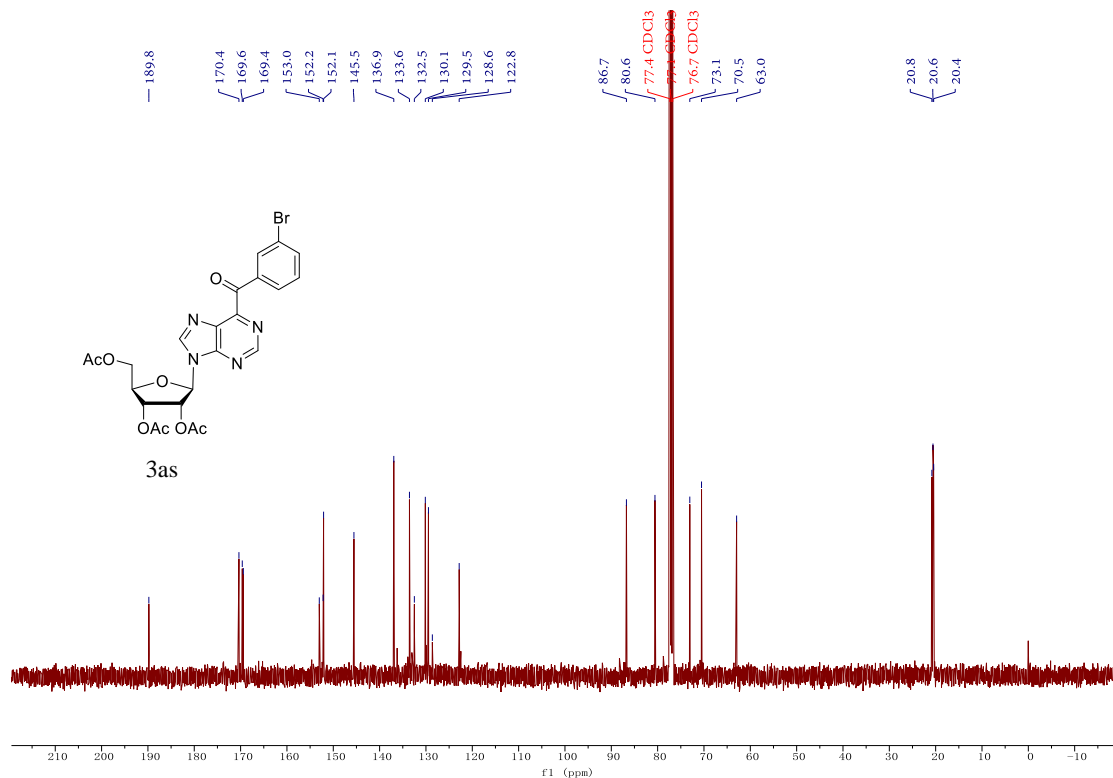

<sup>1</sup>H-NMR spectrum for **3at** (in CDCl<sub>3</sub>)

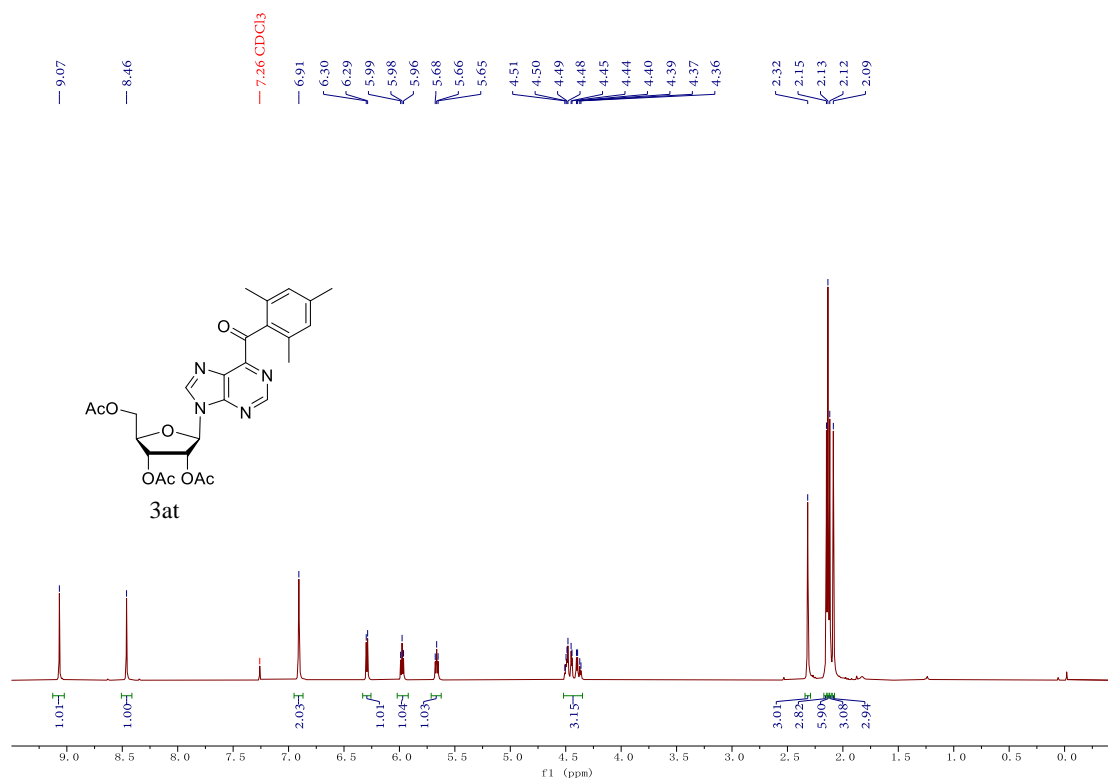

<sup>13</sup>C-NMR spectrum for **3at** (in CDCl<sub>3</sub>)

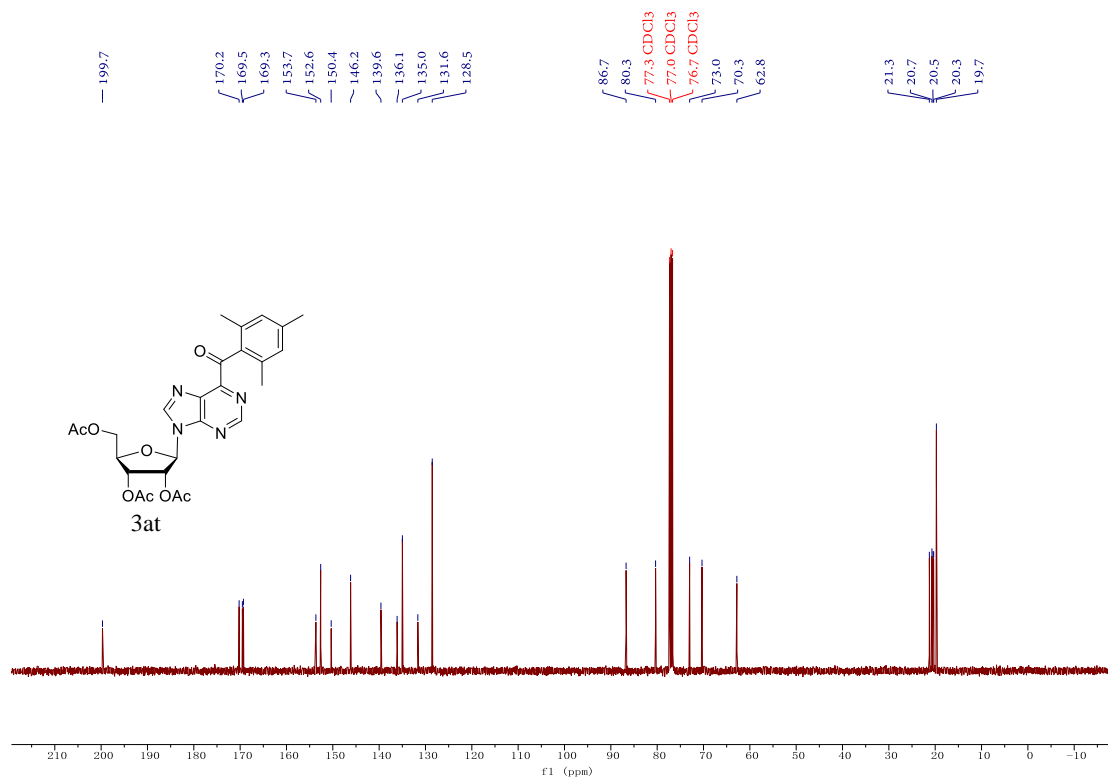

### $^1\text{H-NMR}$ spectrum for **3au** (in $\text{CDCl}_3$ )

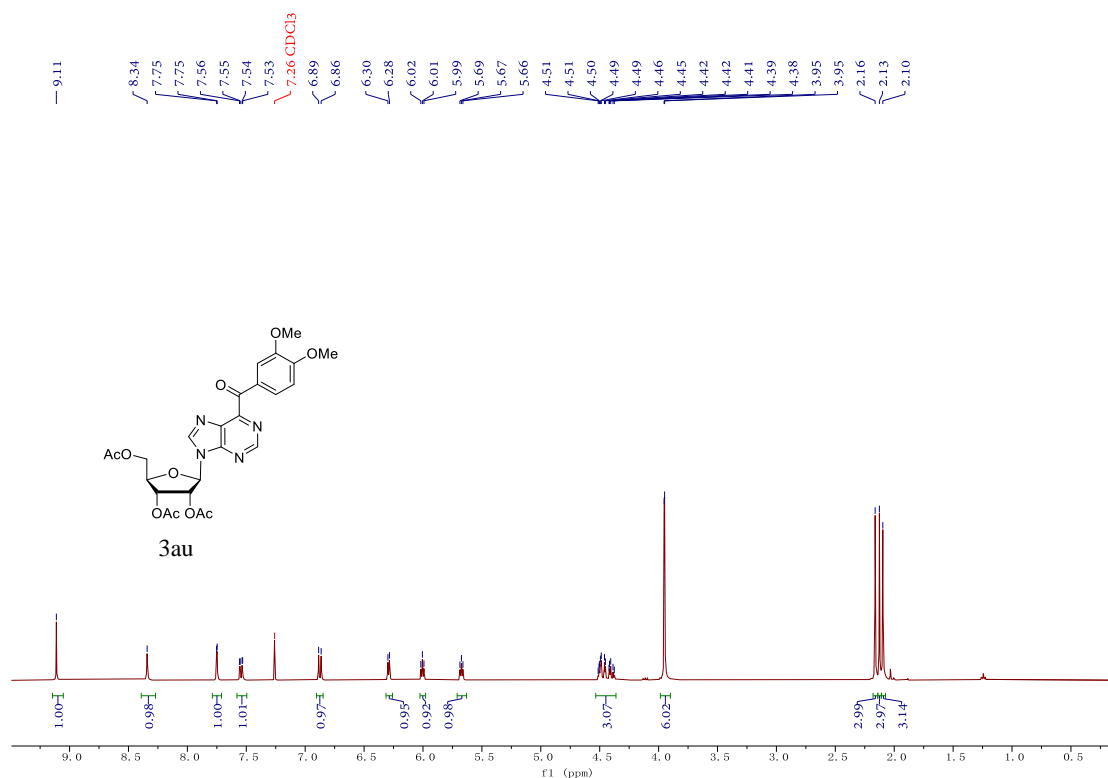

### $^{13}\text{C-NMR}$ spectrum for **3au** (in $\text{CDCl}_3$ )

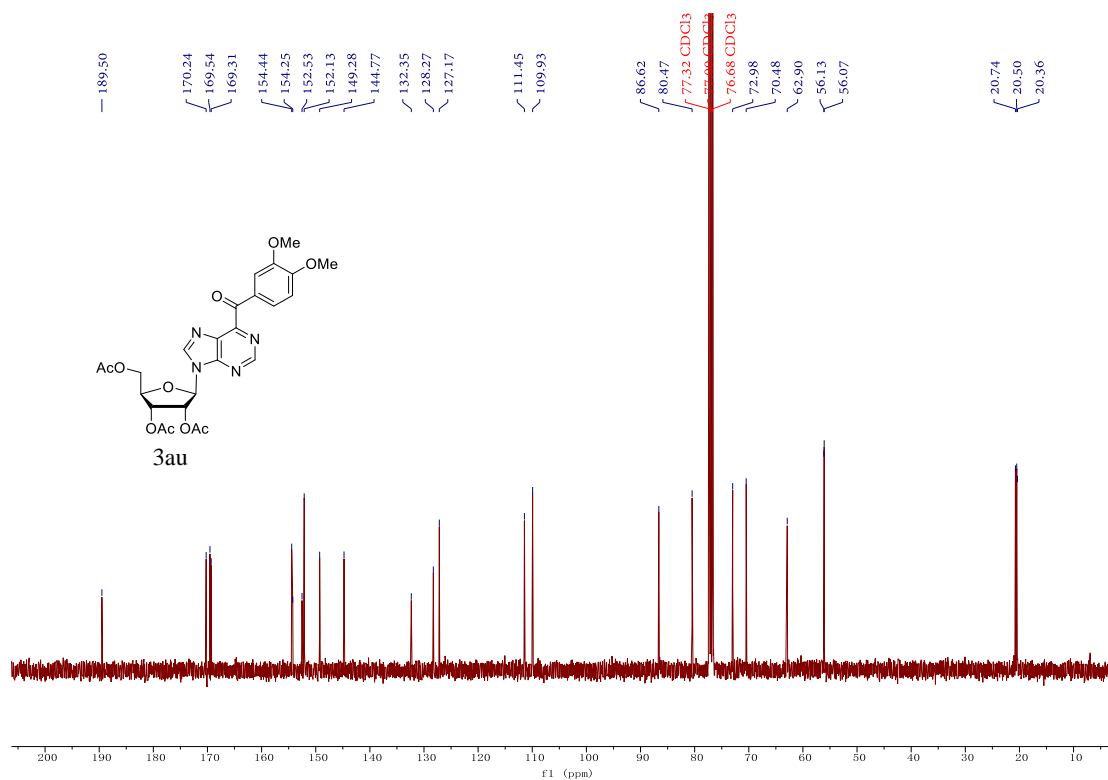

<sup>1</sup>H-NMR spectrum for **3av** (in CDCl<sub>3</sub>)

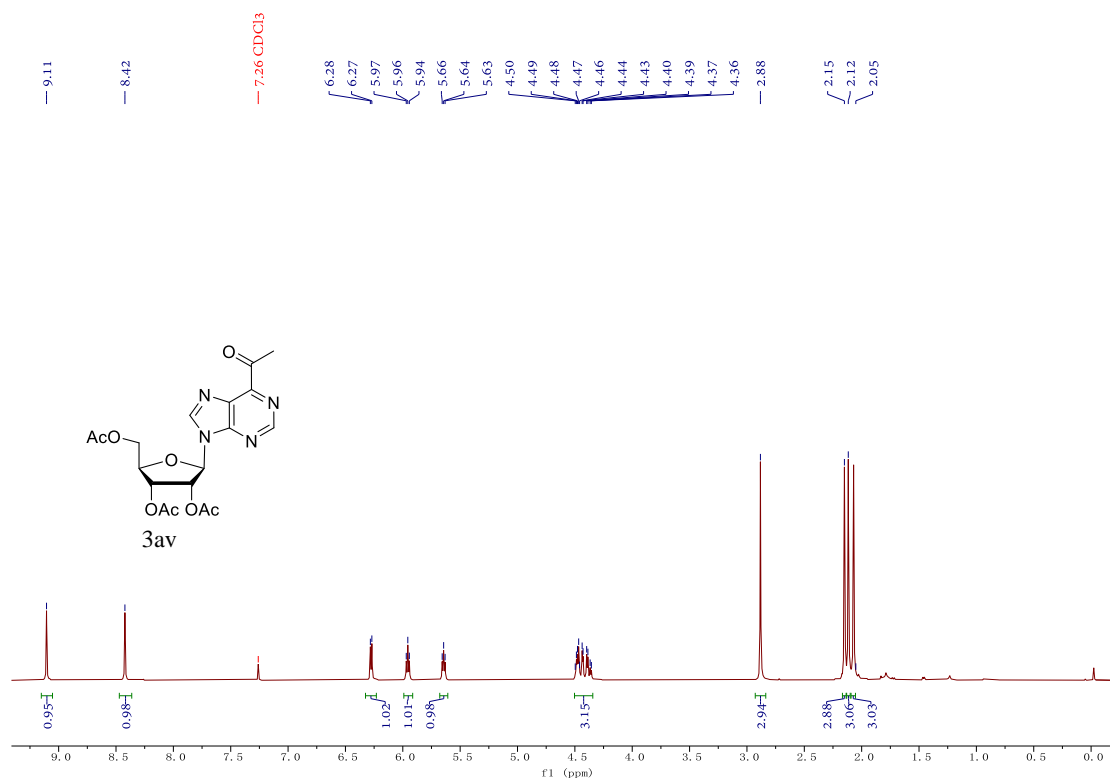

<sup>13</sup>C-NMR spectrum for **3av** (in CDCl<sub>3</sub>)

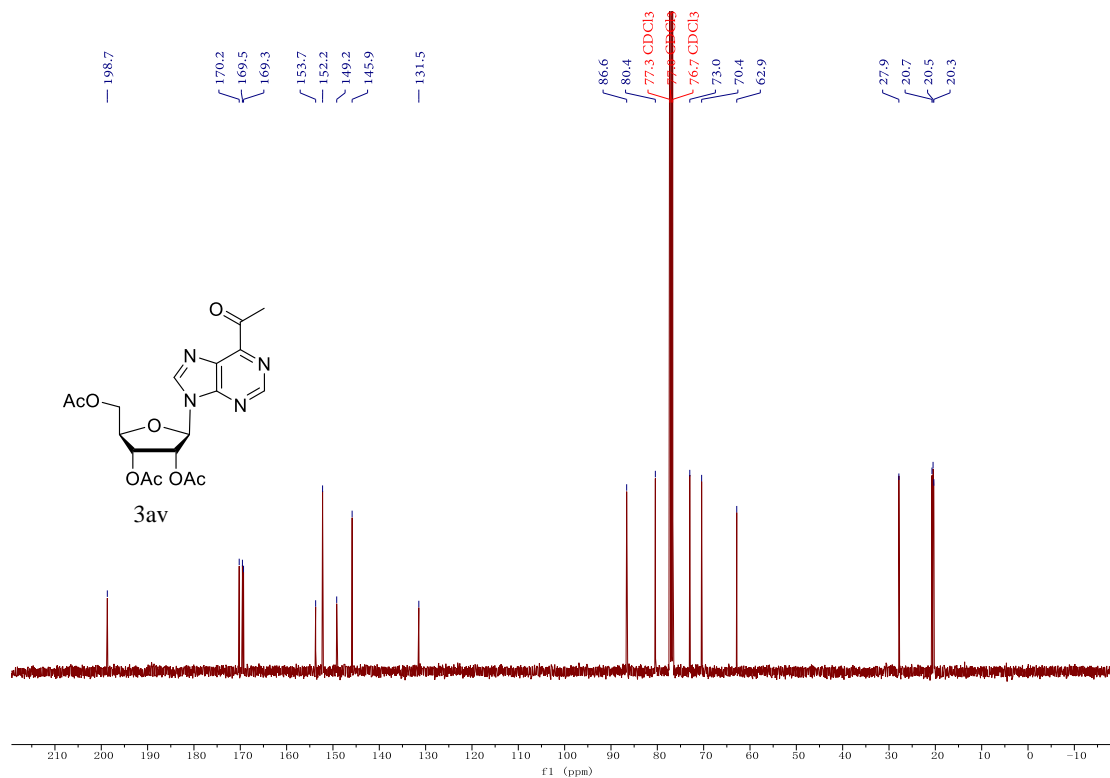

### <sup>1</sup>H-NMR spectrum for **3aw** (in CDCl<sub>3</sub>)

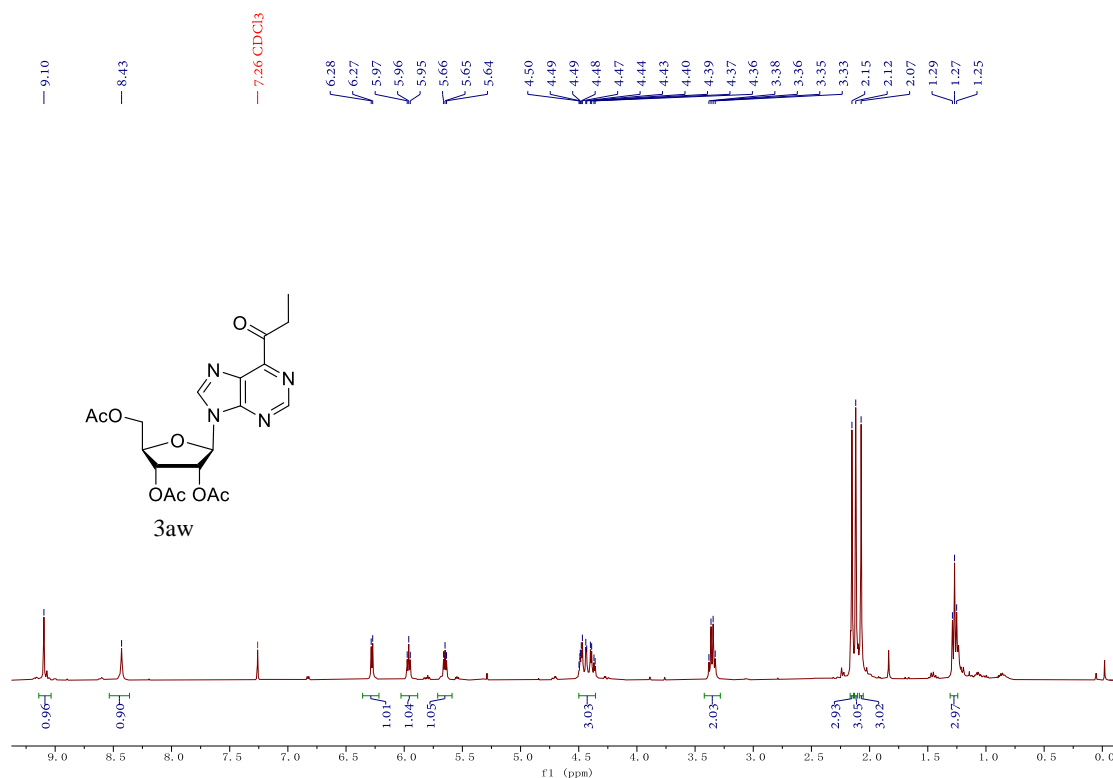

### <sup>13</sup>C-NMR spectrum for **3aw** (in CDCl<sub>3</sub>)

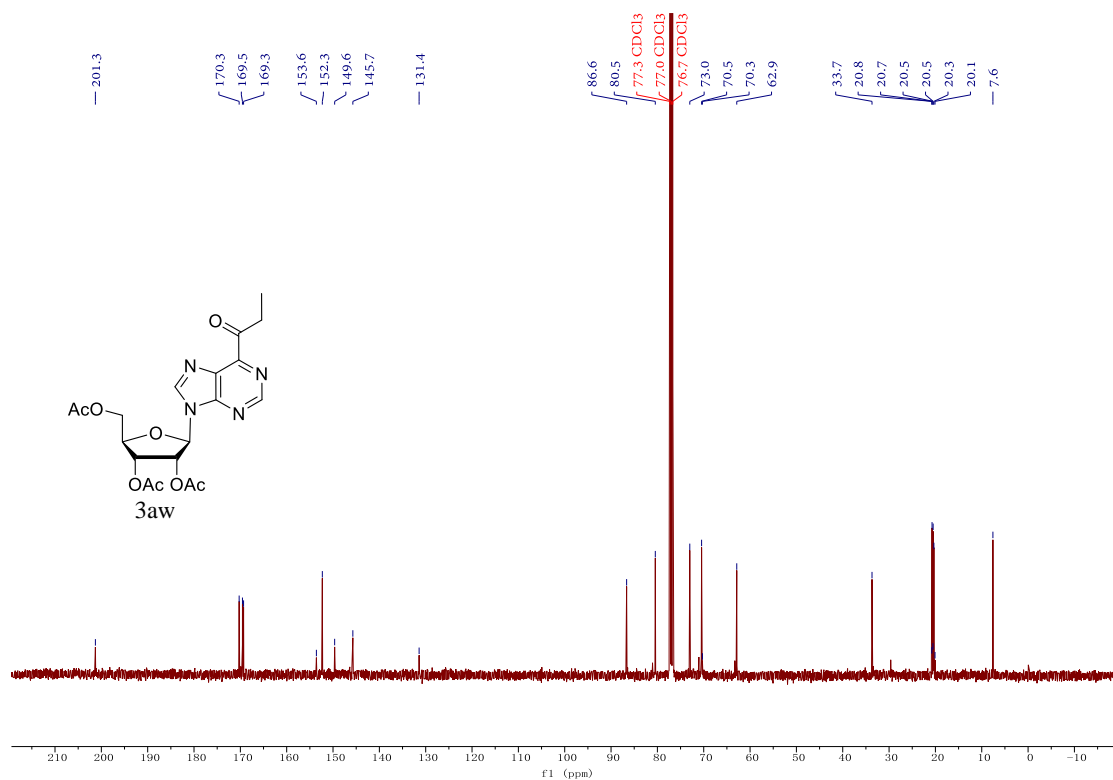

### $^1\text{H-NMR}$ spectrum for **3ax** (in $\text{CDCl}_3$ )

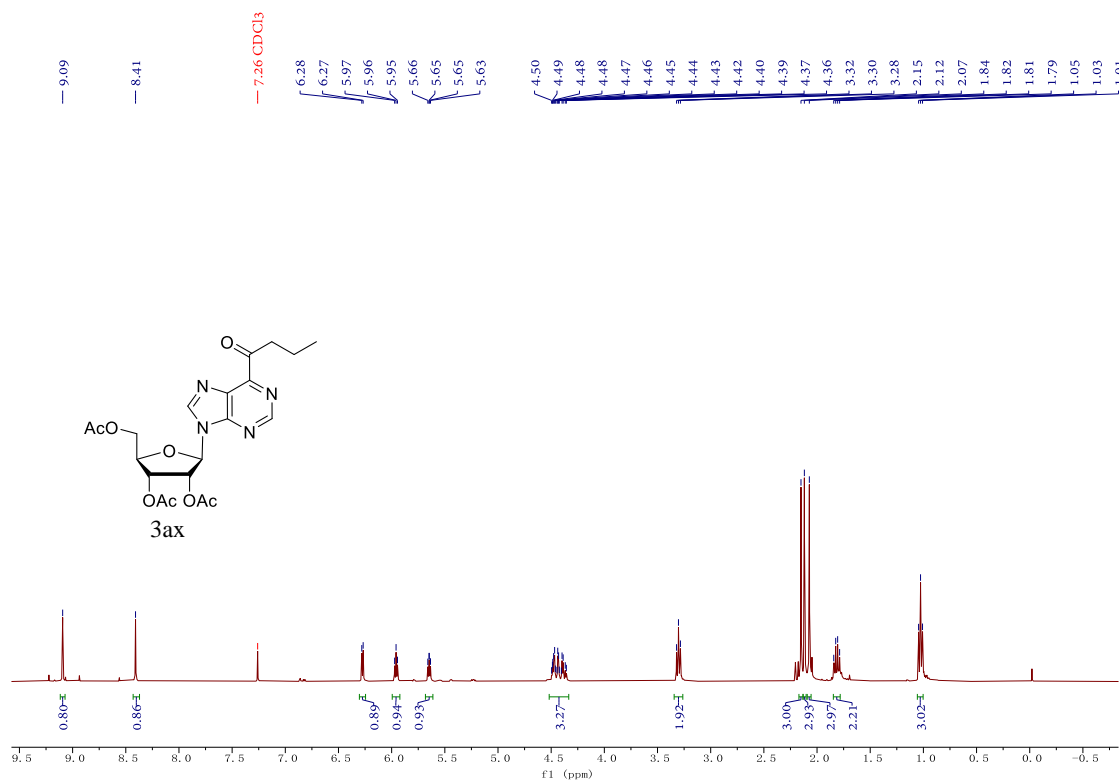

### $^{13}\text{C-NMR}$ spectrum for **3ax** (in $\text{CDCl}_3$ )

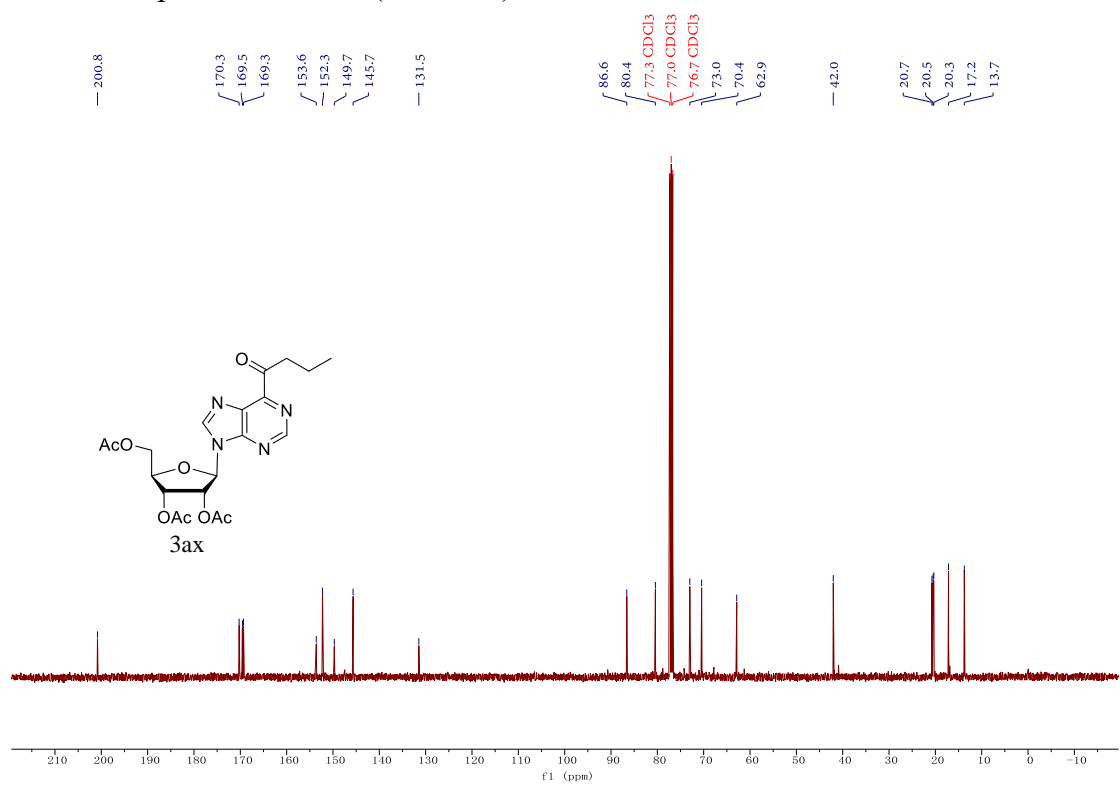

<sup>1</sup>H-NMR spectrum for **3ba** (in CDCl<sub>3</sub>)

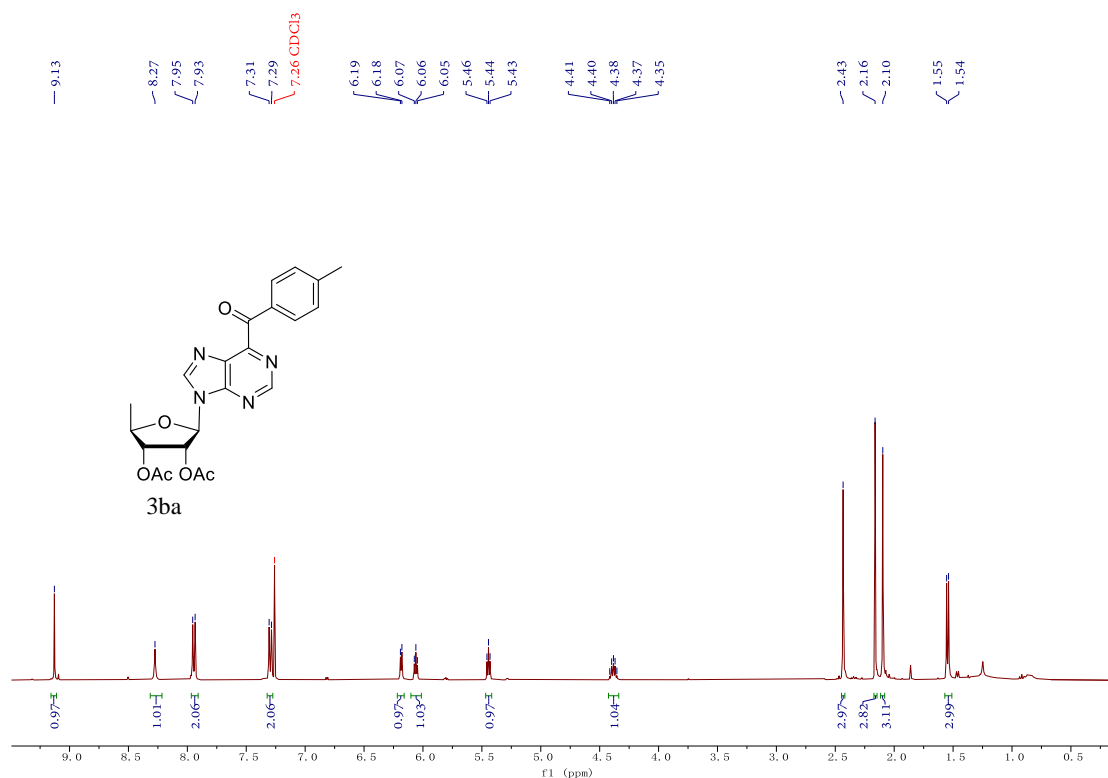

<sup>13</sup>C-NMR spectrum for **3ba** (in CDCl<sub>3</sub>)

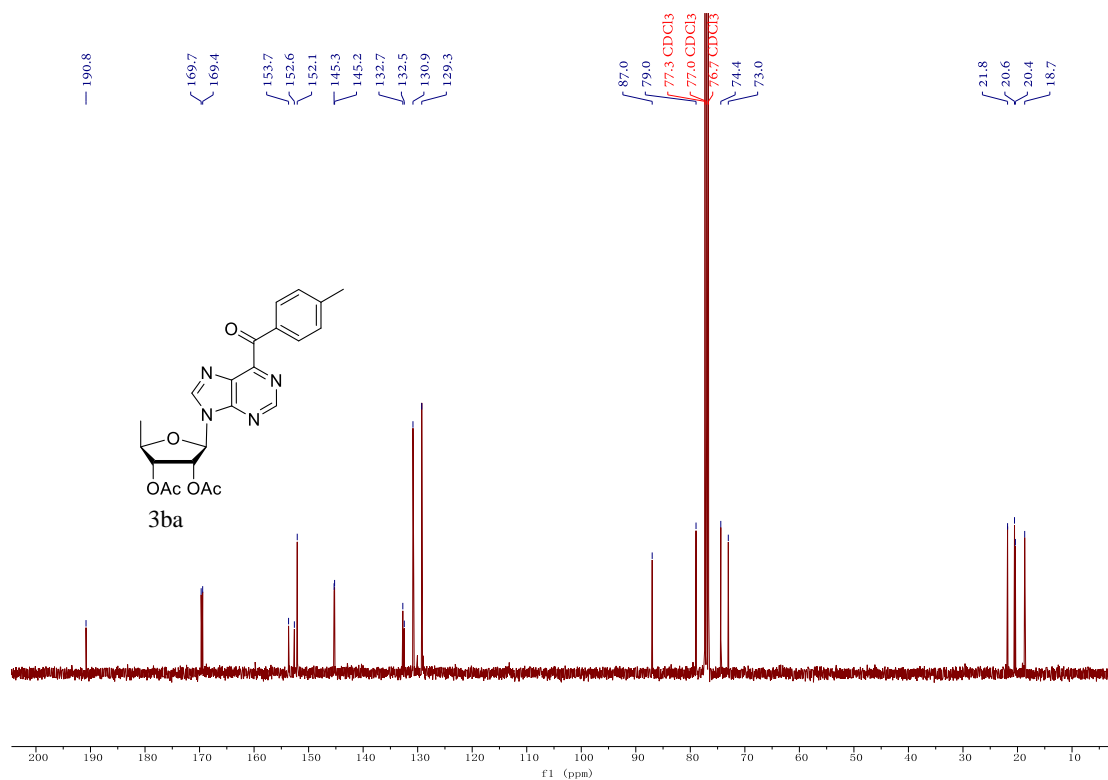

$^1\text{H-NMR}$  spectrum for **3ca** (in  $\text{CDCl}_3$ )

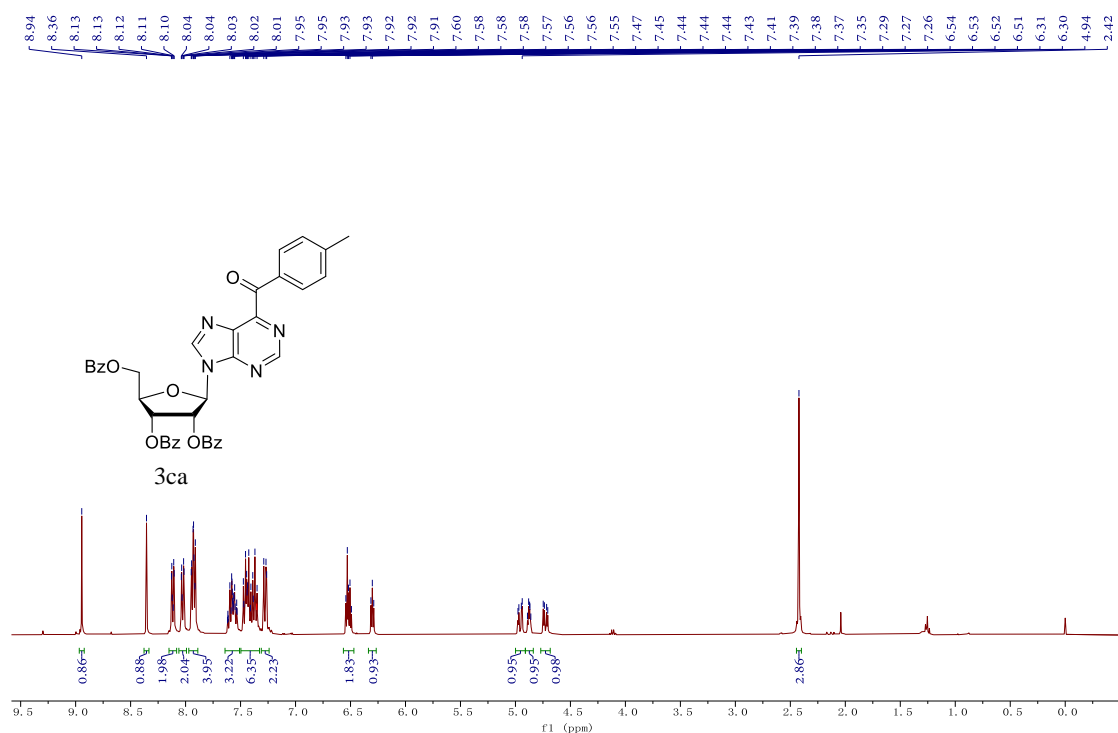

$^{13}\text{C-NMR}$  spectrum for **3ca** (in  $\text{CDCl}_3$ )

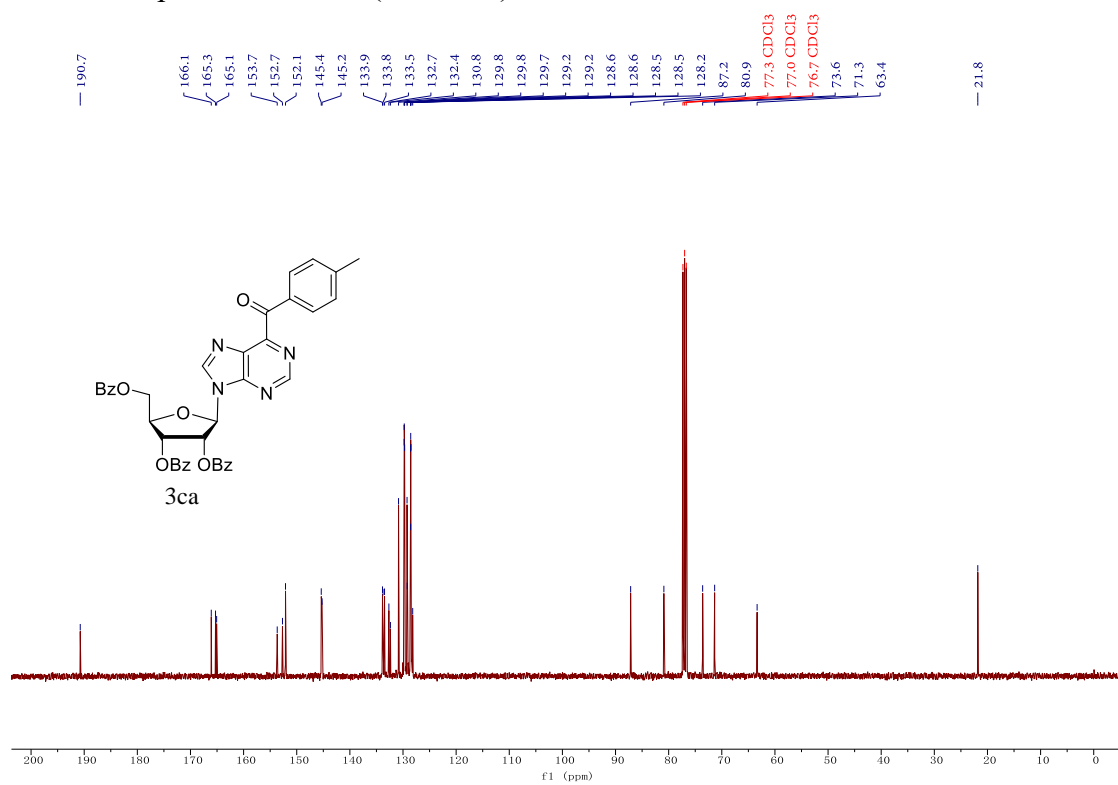



### $^1\text{H-NMR}$ spectrum for **3da** (in $\text{CDCl}_3$ )

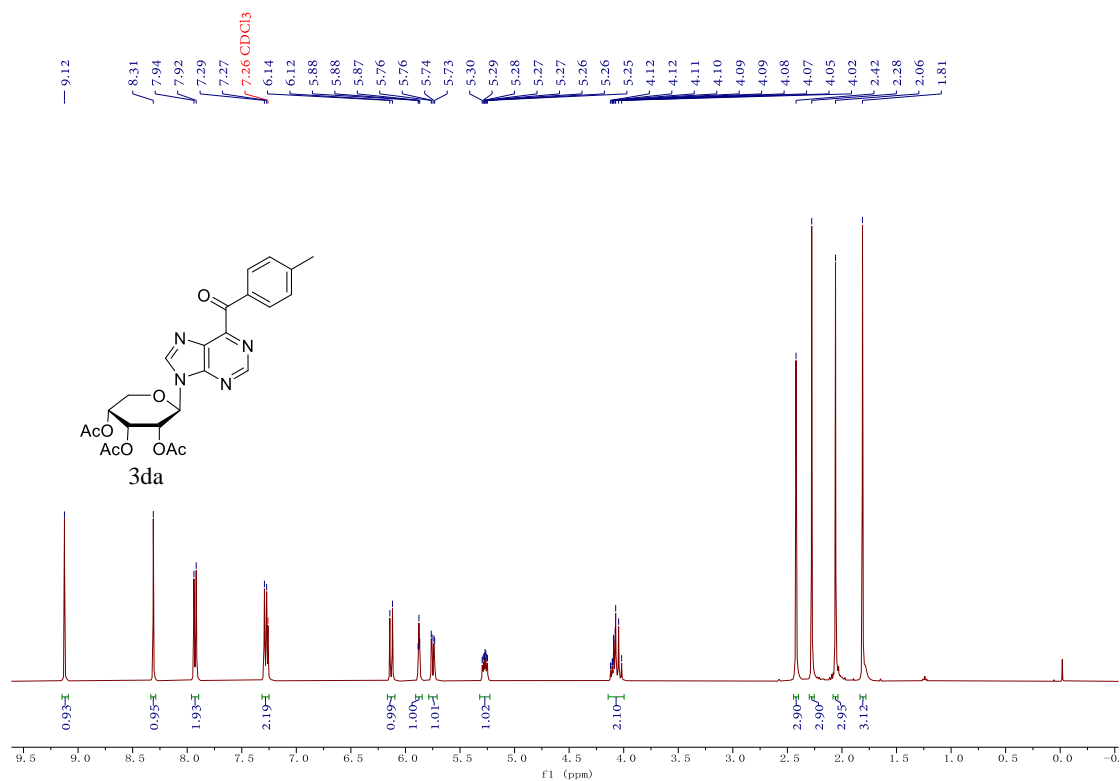

### $^{13}\text{C-NMR}$ spectrum for **3da** (in $\text{CDCl}_3$ )

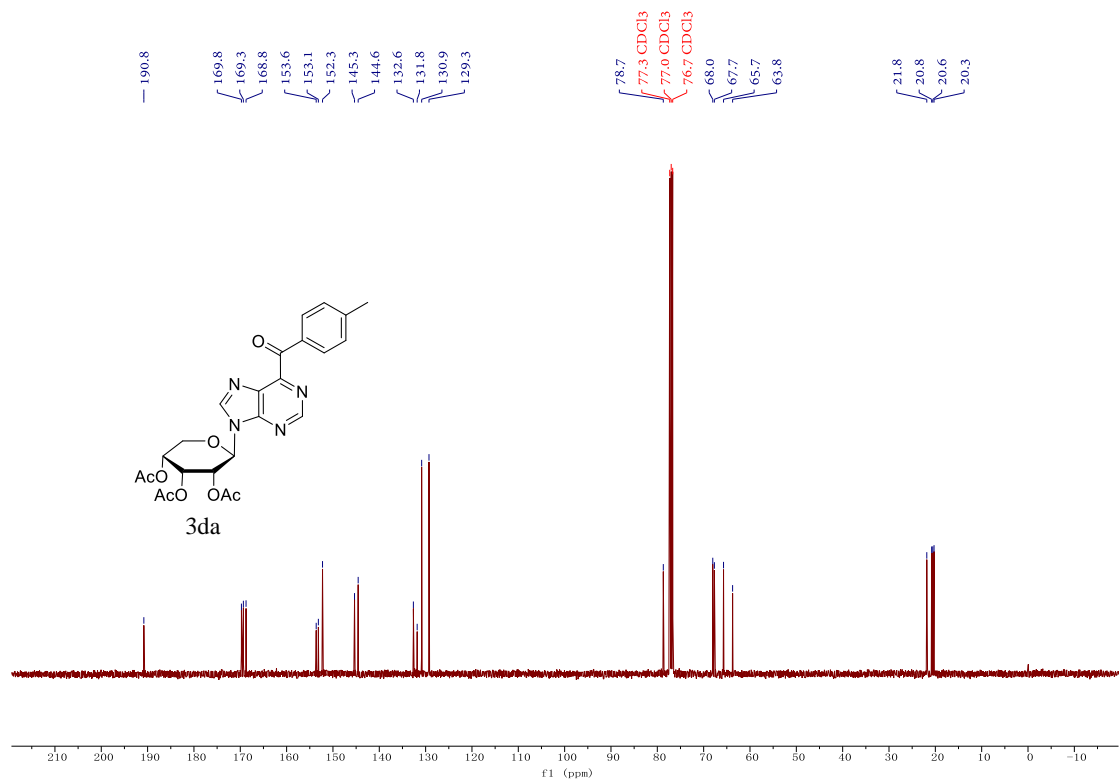

### <sup>1</sup>H-NMR spectrum for **3ea** (in CDCl<sub>3</sub>)

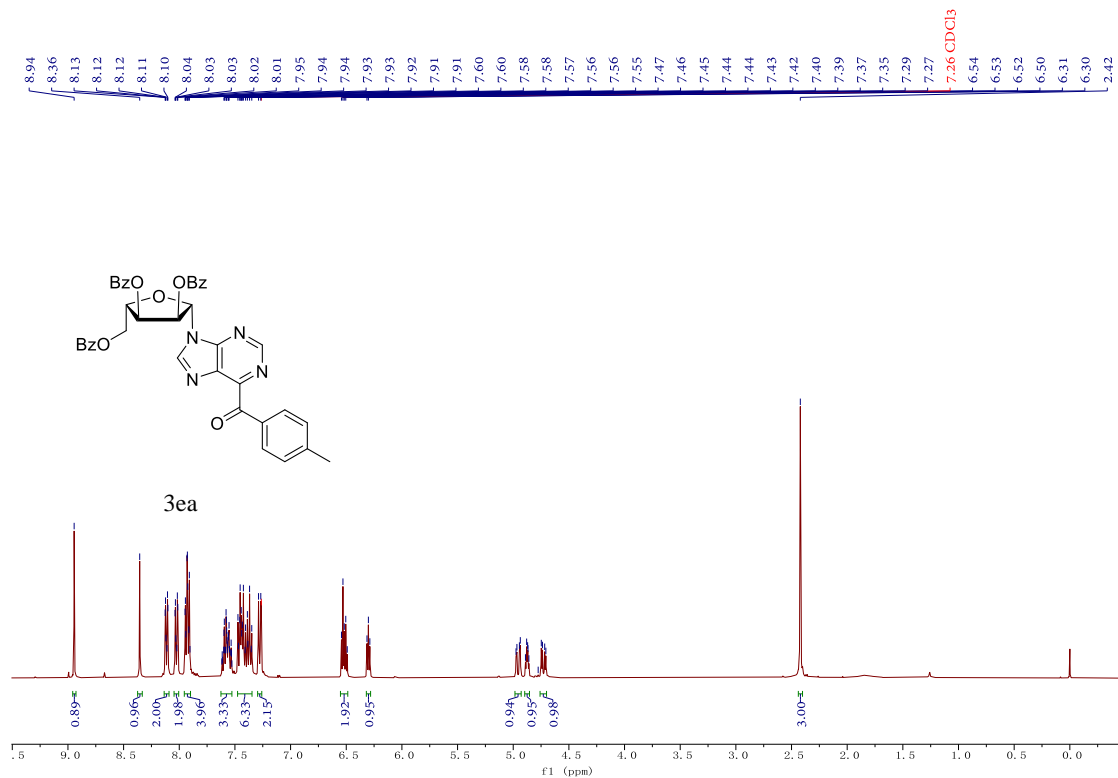

### <sup>13</sup>C-NMR spectrum for **3ea** (in CDCl<sub>3</sub>)

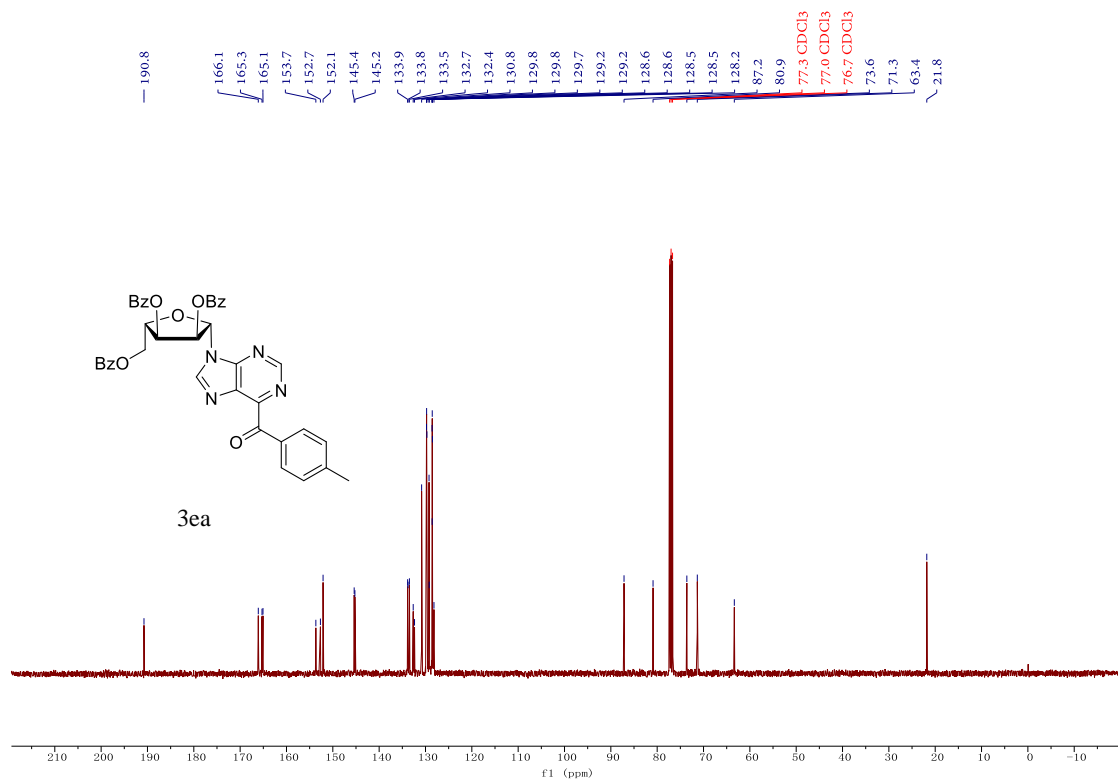

$^1\text{H-NMR}$  spectrum for **3fa** (in  $\text{CDCl}_3$ )

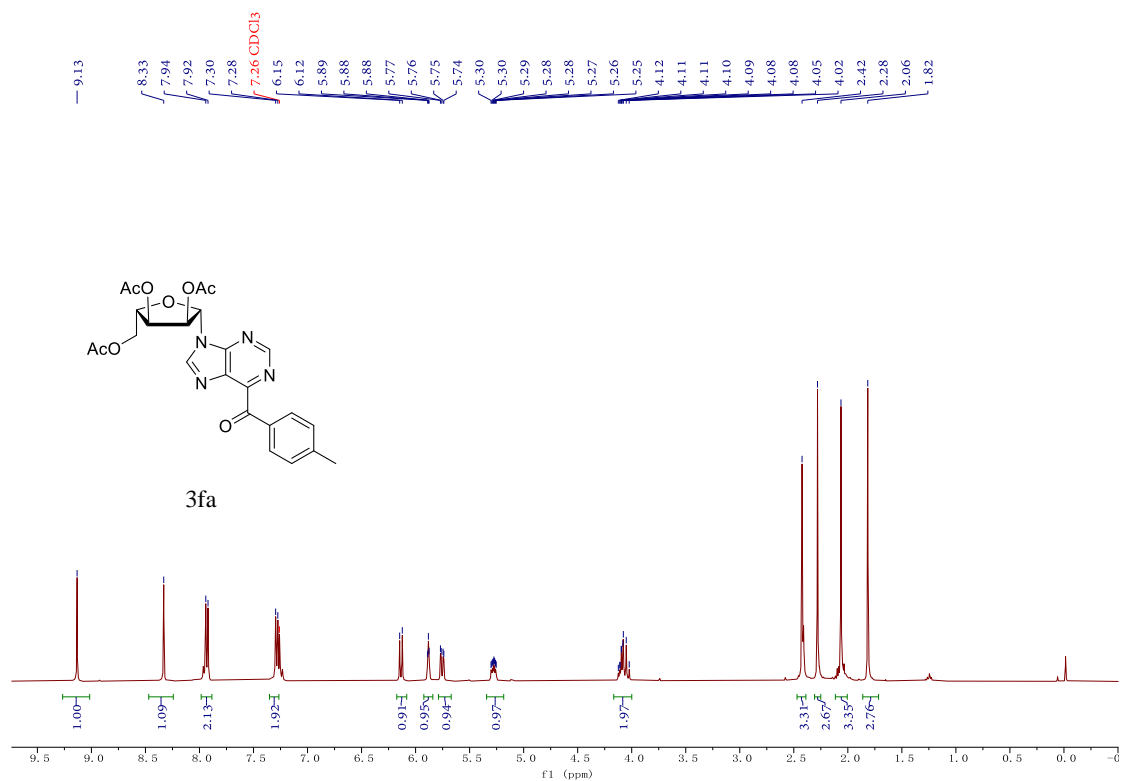

$^{13}\text{C-NMR}$  spectrum for **3fa** (in  $\text{CDCl}_3$ )

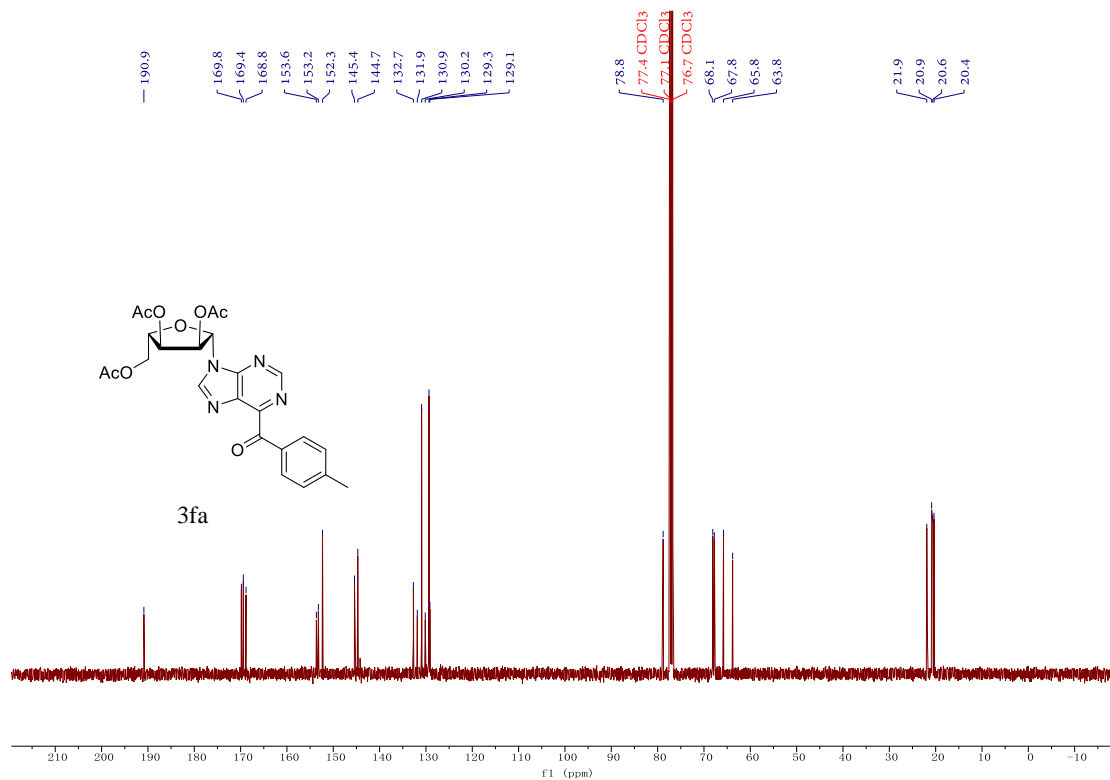

<sup>1</sup>H-NMR spectrum for **3ga** (in CDCl<sub>3</sub>)

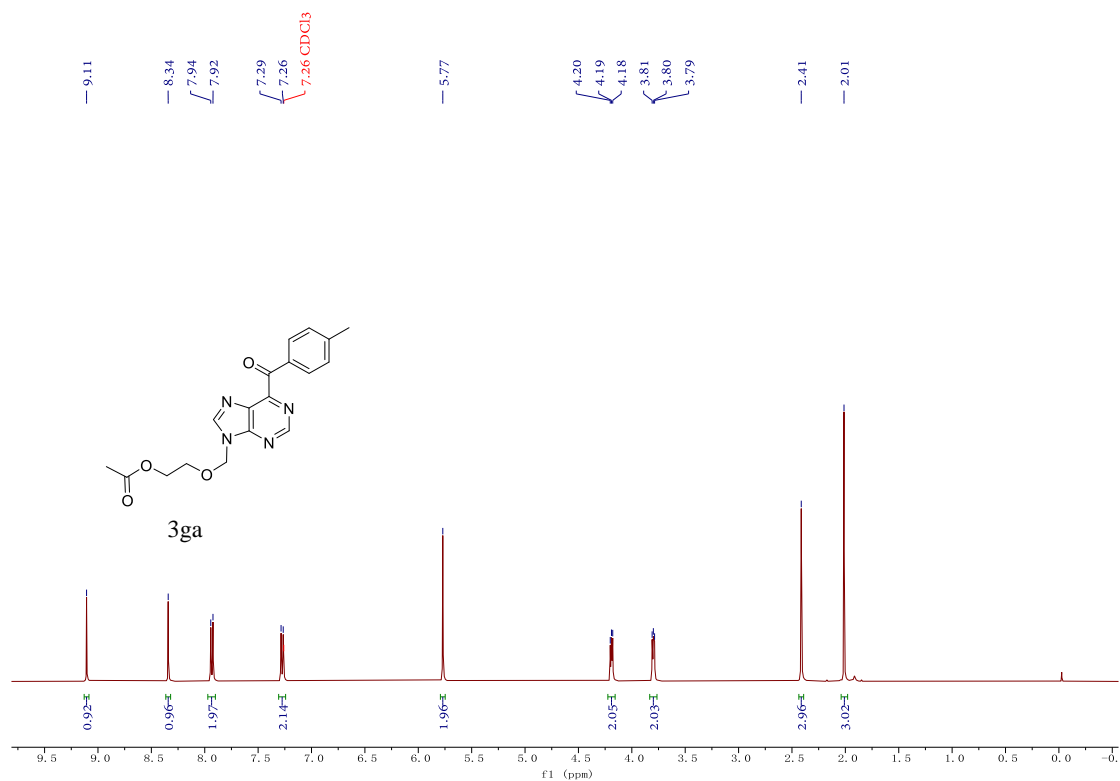

<sup>13</sup>C-NMR spectrum for **3ga** (in CDCl<sub>3</sub>)

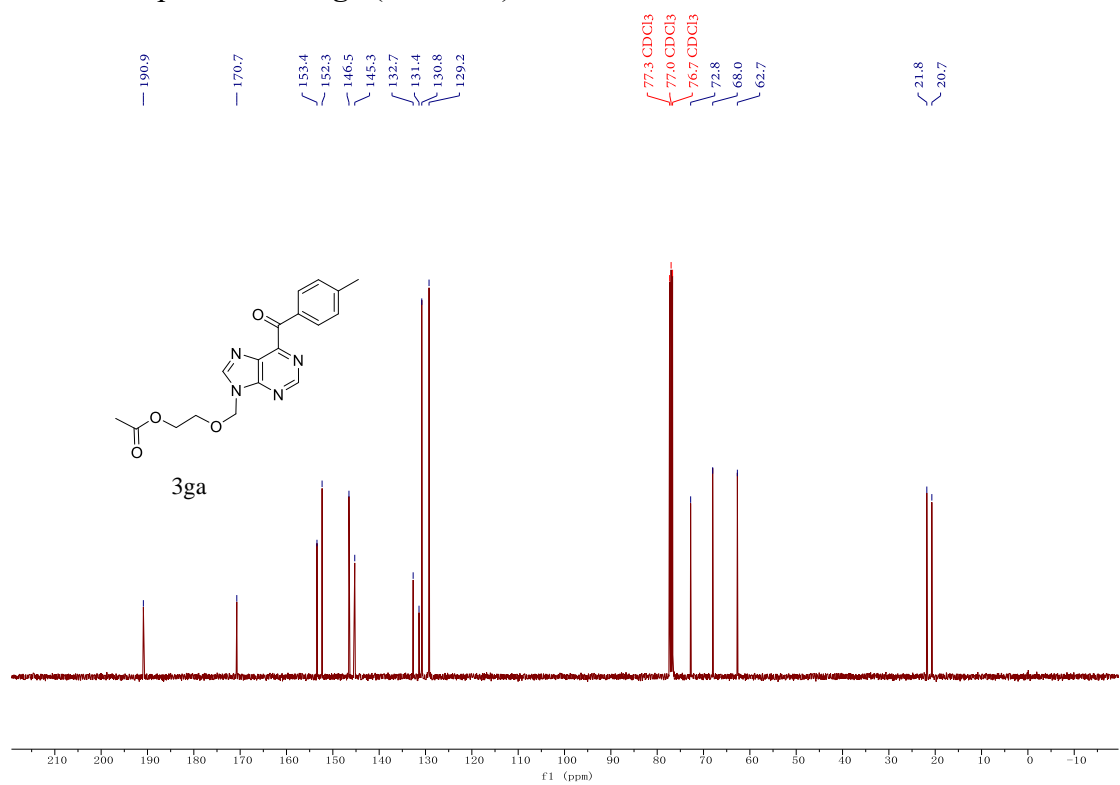

<sup>1</sup>H-NMR spectrum for **3ha** (in CDCl<sub>3</sub>)

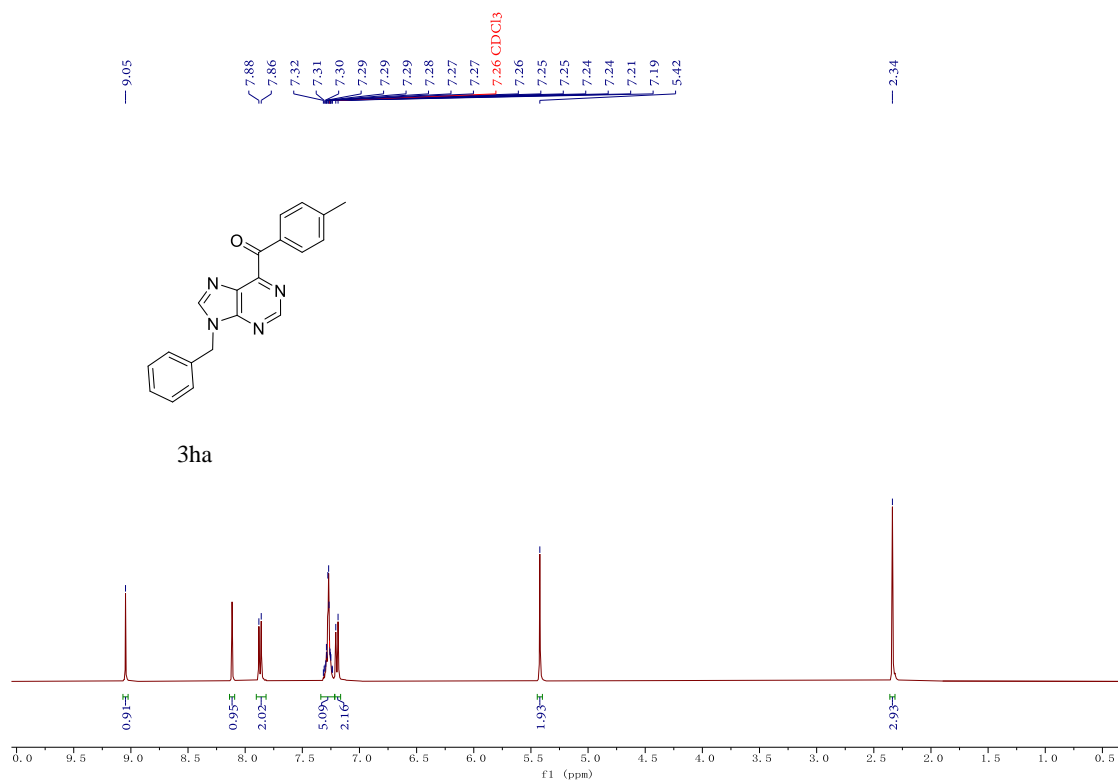

<sup>13</sup>C-NMR spectrum for **3ha** (in CDCl<sub>3</sub>)

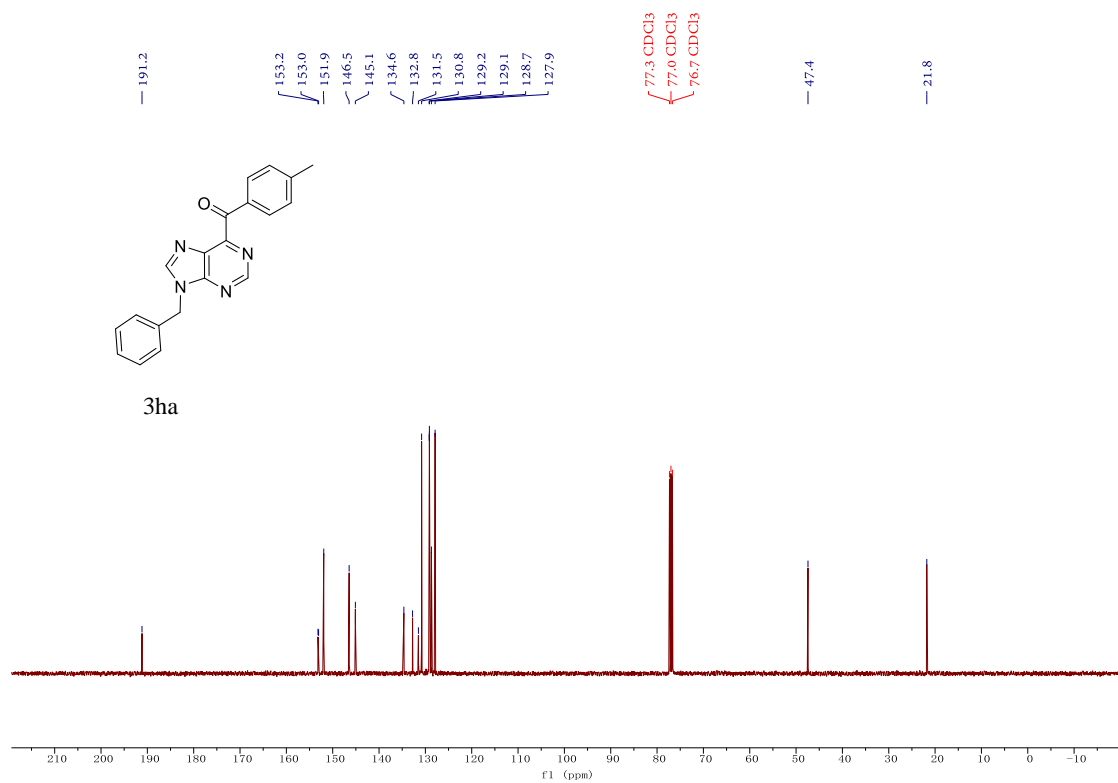

$^1\text{H-NMR}$  spectrum for **3ia** (in  $\text{CDCl}_3$ )

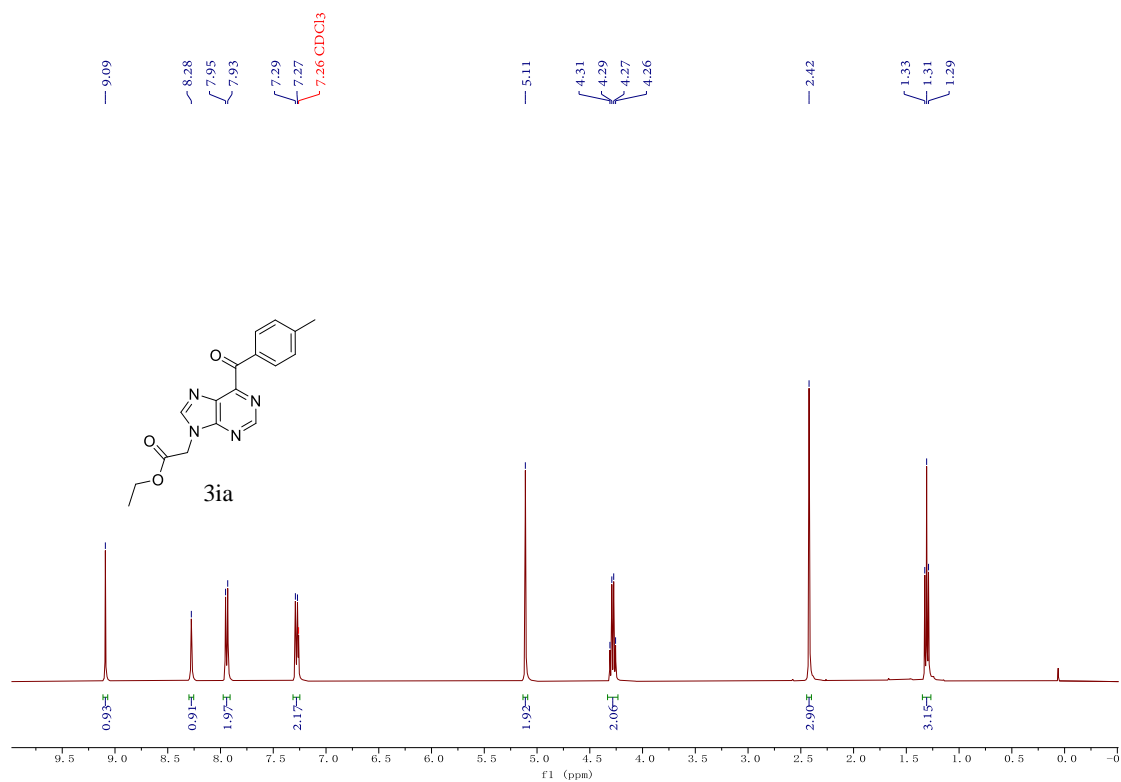

$^{13}\text{C-NMR}$  spectrum for **3ia** (in  $\text{CDCl}_3$ )

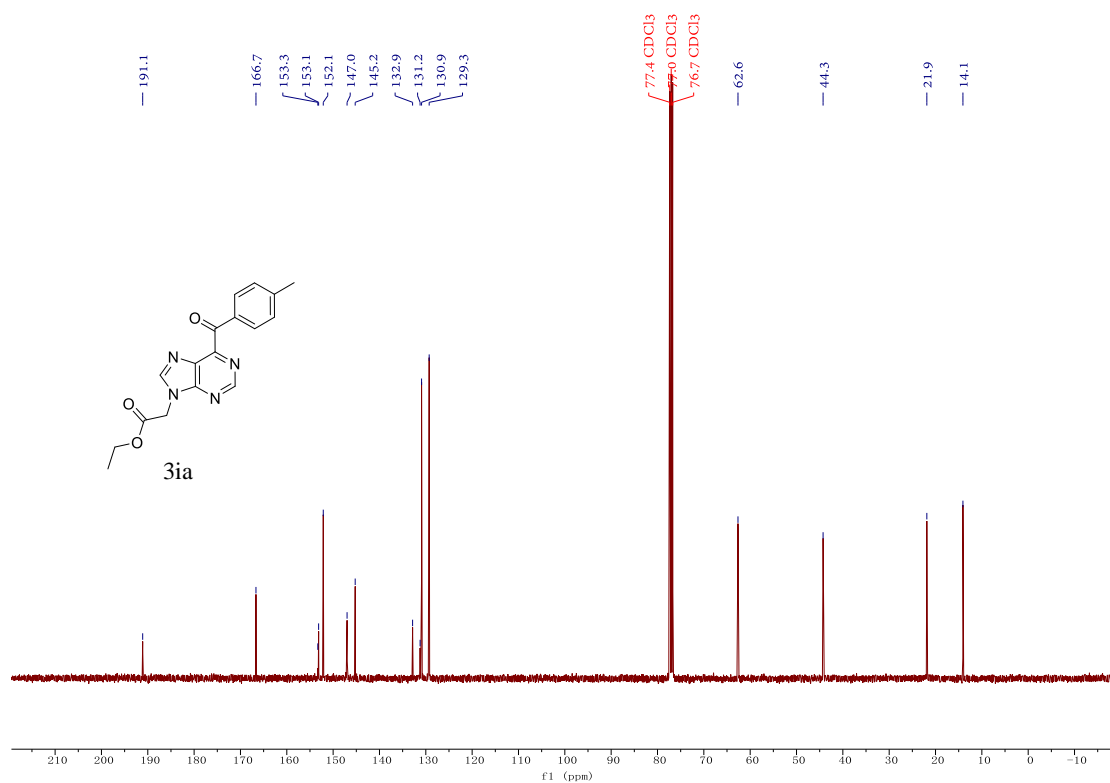

<sup>1</sup>H-NMR spectrum for **3ja** (in CDCl<sub>3</sub>)

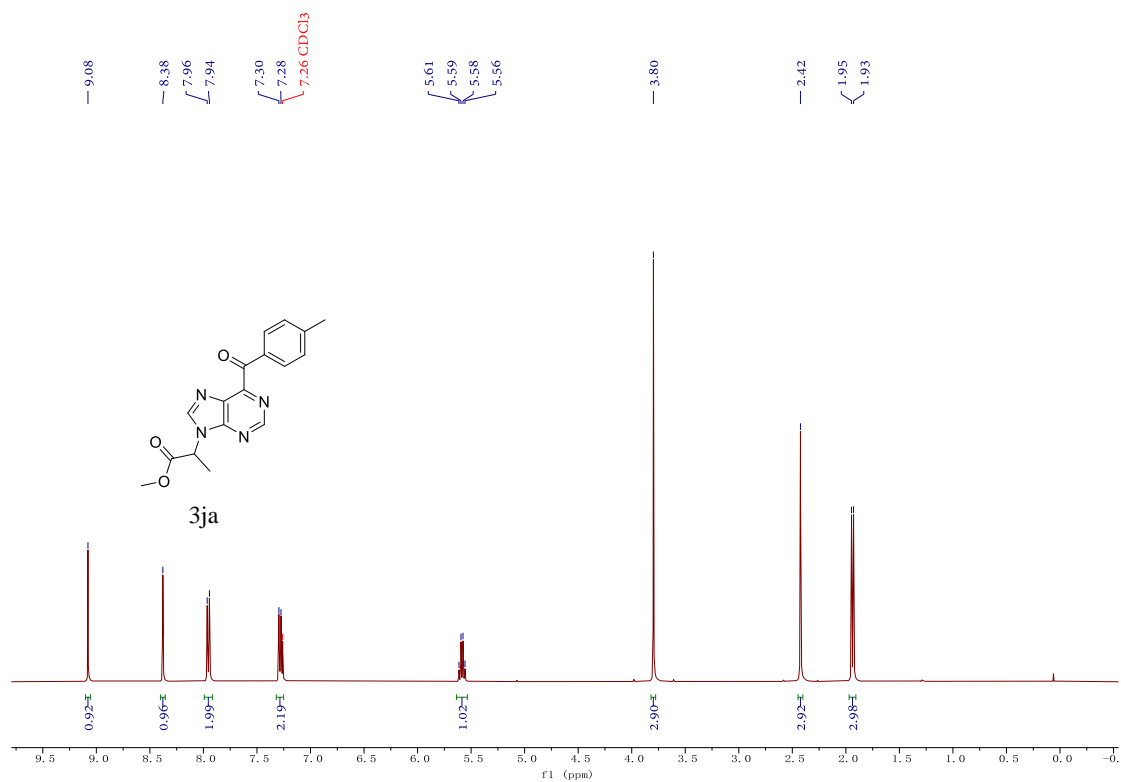

<sup>13</sup>C-NMR spectrum for **3ja** (in CDCl<sub>3</sub>)

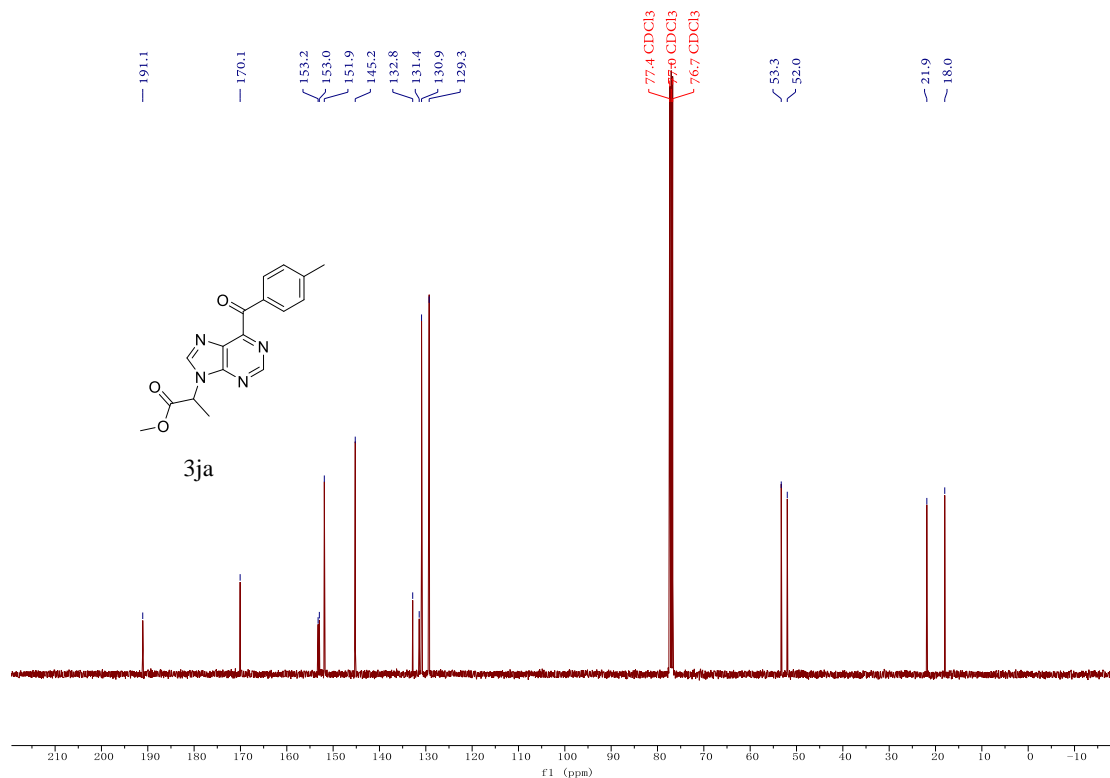

<sup>1</sup>H-NMR spectrum for **1a** (in CDCl<sub>3</sub>)

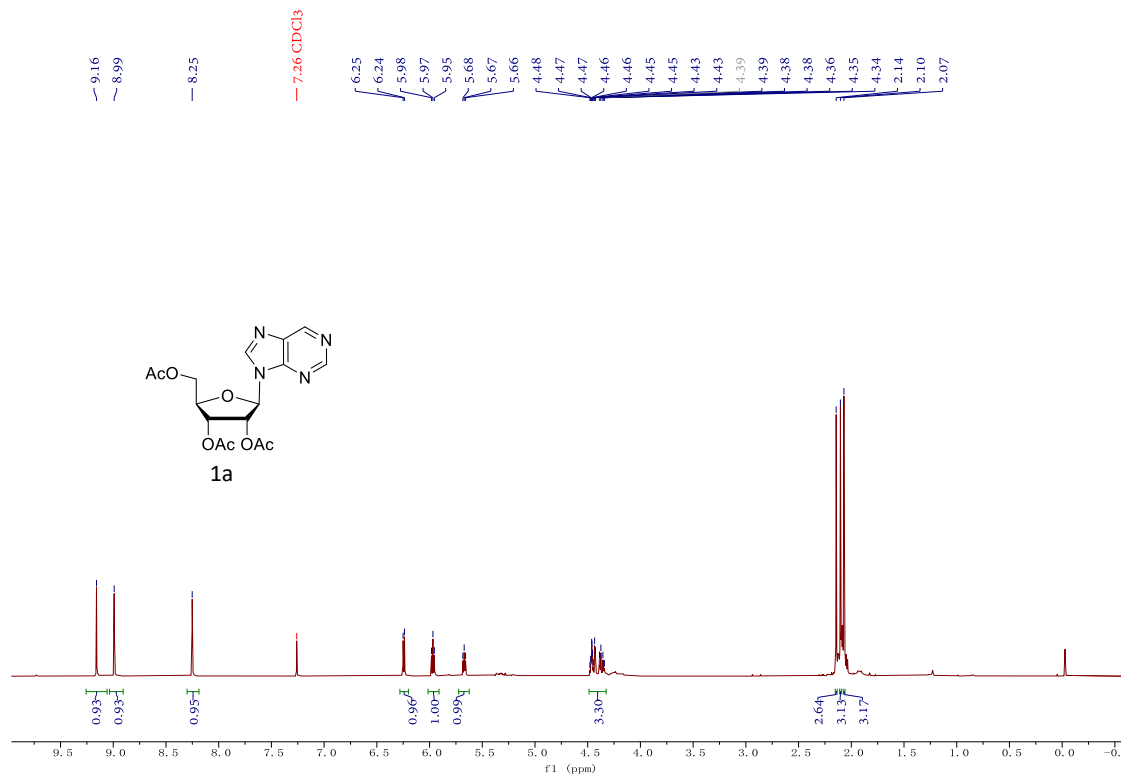

<sup>1</sup>H-NMR spectrum for **1a**+(1.5eq) TFA (in CDCl<sub>3</sub>)

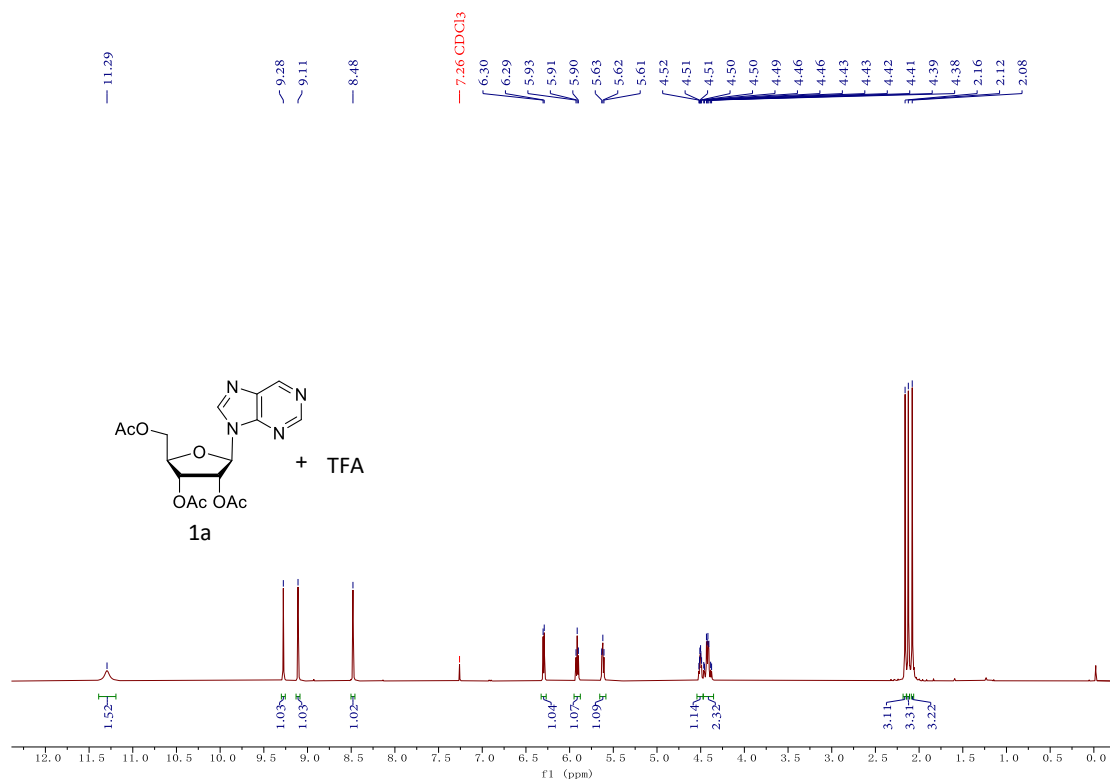



HSQC NMR Spectrum for **3aa** (in CDCl<sub>3</sub>)

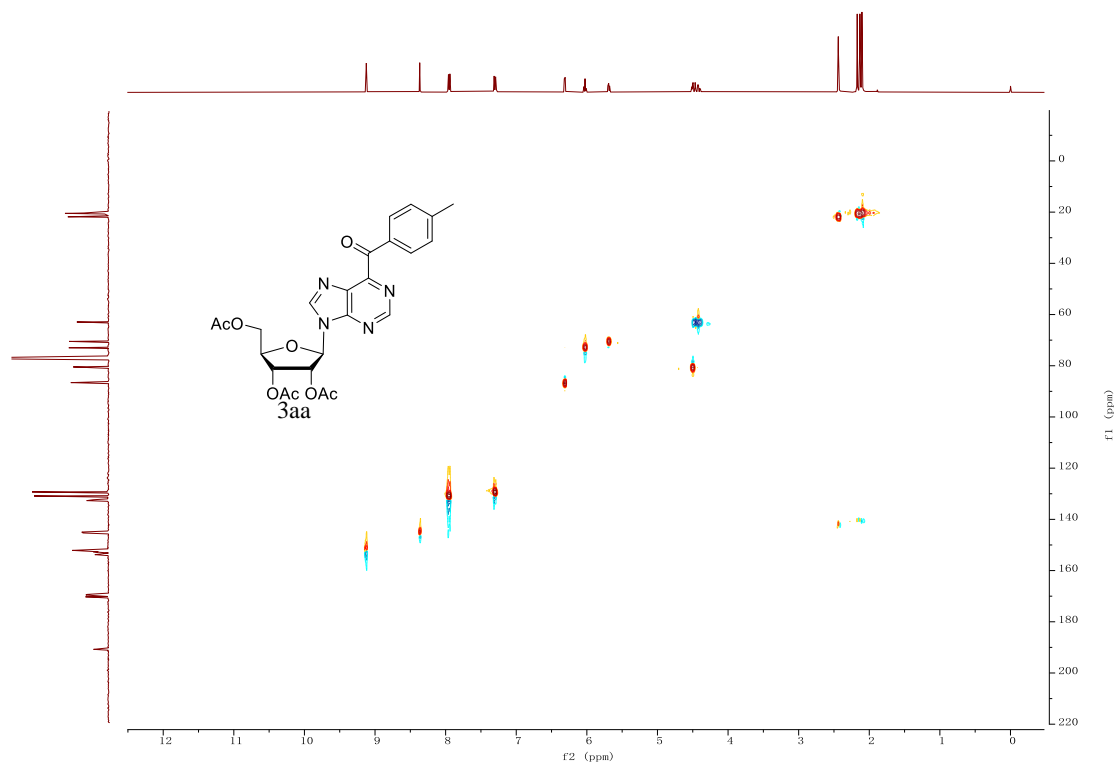

HMBC NMR Spectrum for **3aa** (in CDCl<sub>3</sub>)

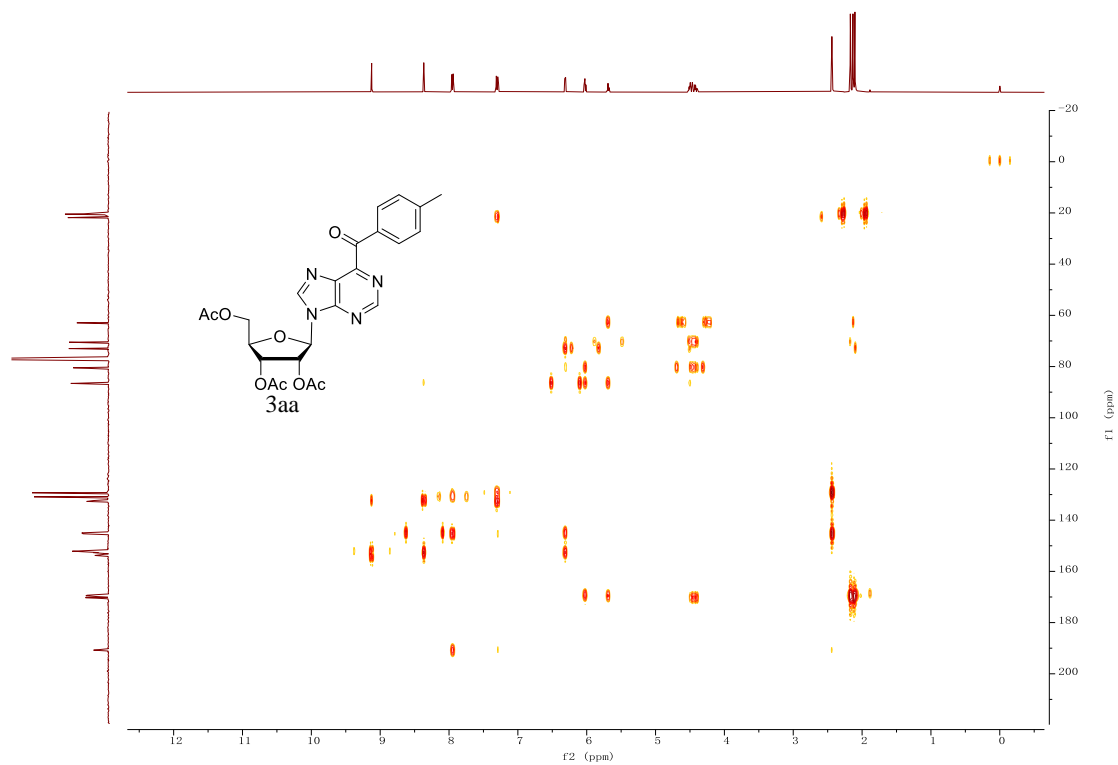

COSY NMR Spectrum for **3aa** (in CDCl<sub>3</sub>)

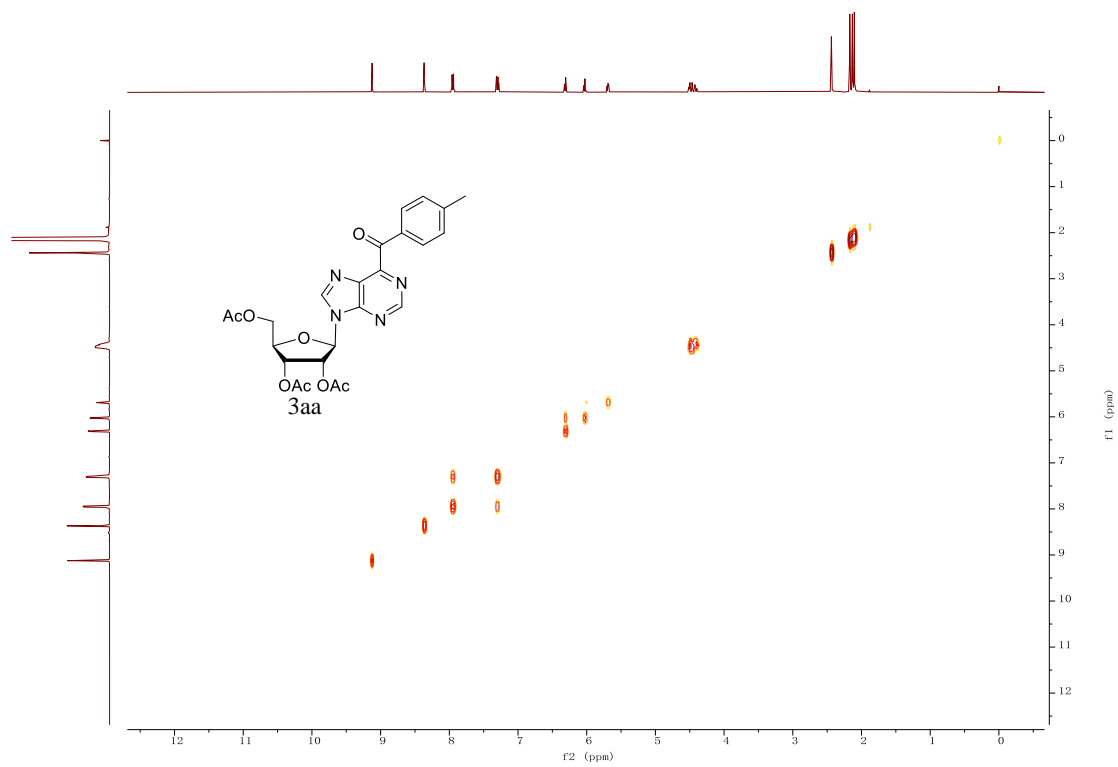

Supplement: d3cc00906h1.pdf [file d3cc00906h1.pdf]
